# Supplementary material
Source: publisher figshare collection journal article supplement (https://acs.figshare.com/ndownloader/files/4369108)
Supplement: Supplementary file 1 [file 4369108]

## Supporting Information for

### **Total Synthesis of Phorboxazole A via de novo Oxazole Formation:**

### **Convergent Total Synthesis**

Bo Wang, T. Matthew Hansen, Lynn Weyer, Dimao Wu, Ting Wang, Mathias Christmann, Yingtao Lu, Lu Ying, Mary M. Engler, Russell D. Cink, Chi-Sing Lee, Feryan Ahmed, and Craig J. Forsyth<sup>\*</sup>

Department of Chemistry, The Ohio State University, 100 West 18<sup>th</sup> Avenue, Columbus, Ohio  
43210, USA

<sup>\*</sup>email: [forsyth@chemistry.ohio-state.edu](mailto:forsyth@chemistry.ohio-state.edu)

Phone: (614) 688-5347

Fax: (614) 292-1685

|                                                                           |              |
|---------------------------------------------------------------------------|--------------|
| Contents:                                                                 | Page         |
| General Methods                                                           | S-2          |
| Experimentals for synthetic compounds                                     | S-3 to S-34  |
| <sup>1</sup> H NMR and <sup>13</sup> C NMR spectra of synthetic compounds | S-35 to S-98 |

## General Methods

All air and moisture sensitive reactions were carried out under argon in oven-dried glassware using standard syringe, cannula and septa techniques. Unless otherwise noted, all reactions were carried out at room temperature (20-25 °C). Molecular sieves were activated by heating at 120 °C for 24 hours. Tetrahydrofuran (THF), methylene chloride (CH<sub>2</sub>Cl<sub>2</sub>), diethyl ether (diethyl ether), toluene and dimethylformamide (DMF) were either purified using a Pure Solv solvent purification system or by the following methods: THF and diethyl ether were distilled from Na/benzylphenone ketyl under nitrogen. CH<sub>2</sub>Cl<sub>2</sub>, toluene, benzene, acetonitrile (CH<sub>3</sub>CN), triethylamine (Et<sub>3</sub>N), *N,N*-diisopropylethylamine (*i*-Pr<sub>2</sub>NEt), hexanes, and *n*-pentane were distilled from CaH<sub>2</sub> under nitrogen. Dimethylsulfoxide (DMSO) and DMF were dried over activated 4 Å molecular sieves. Methanol was dried over activated 3 Å molecular sieves. Trifluoroacetic acid (TFA) was distilled under argon. Deuterated chloroform (CDCl<sub>3</sub>) was neutralized with anhydrous potassium carbonate. Other reagents were used as received from commercial sources unless otherwise noted. Flash column chromatography was performed using Baker Flash silica gel 60 or Silicylce Silicaflash P60 silica gel. Analytical TLC was performed with 25 µm Merck Kieselgel (EM Science) silica gel 60 F<sub>254</sub> plates, visualized by fluorescence upon 254 nm irradiation and/or staining with anisaldehyde reagent (450 mL of 90% ethanol, 25 mL of sulfuric acid, 15 mL of acetic acid, and 25 mL of anisaldehyde). The solvent combinations for flash column chromatography, TLC, and recrystallization are shown in volume ratio. <sup>1</sup>H NMR and <sup>13</sup>C NMR spectra were obtained in CDCl<sub>3</sub> and referenced to the residual CDCl<sub>3</sub> at 7.27 ppm (<sup>1</sup>H) and 77.0 ppm (<sup>13</sup>C) unless otherwise indicated, using 300 or 500 MHz Varian instruments, and 300, 400, or 500 MHz Bruker instruments. Optical rotations were obtained using a JASCO, DIP-370 digital polarimeter at sodium D line (589 nm) using 3.5 i.d. × 50 mm cylindrical glass cell and were reported in concentration (*c* = g/100 mL) at 23 °C. Infrared (IR) spectra of neat compounds were obtained as thin films on 5 mm NaCl plates using a MIDAC Prospect FT-IR spectrophotometer. High-resolution mass spectrometric analyses were performed on Bruker Biotof II or Bruker Microtof (ESI) mass spectrometers using methanol as the solvent.

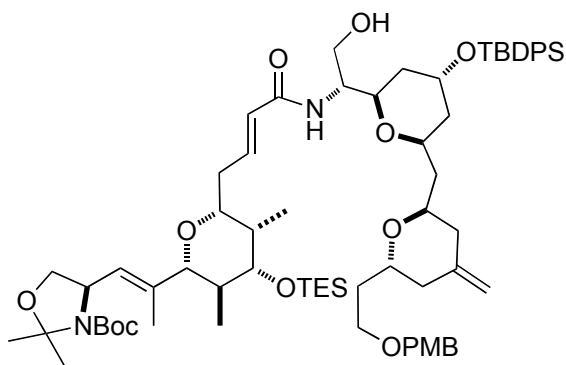

### Amide **8**.

To a solution of carboxylic acid **7**<sup>1</sup> (149 mg, 262  $\mu\text{mol}$ ) and amino-alcohol **6**<sup>1</sup> (176 mg, 261  $\mu\text{mol}$ ) in  $\text{CH}_2\text{Cl}_2$  (25 mL) were added EDCI·MeI (116 mg, 390  $\mu\text{mol}$ ) and HOBT·H<sub>2</sub>O (6 mg, 40  $\mu\text{mol}$ ). The mixture was stirred for 3 h then concentrated by rotary evaporation. The residue was purified by silica gel chromatography (hexanes–ethyl acetate, 1:1) to afford **8** (278 mg, 227  $\mu\text{mol}$ , 87%) as an amorphous solid: mp 60–67 °C;  $R_f$  0.55 (hexanes–ethyl acetate, 1:1);  $[\alpha]_D^{23}$  –1.2 ( $c$  1.73,  $\text{CHCl}_3$ ); IR 3440, 3080, 2960, 1695, 1515, 1385, 1245  $\text{cm}^{-1}$ ;  $^1\text{H}$  NMR (500 MHz)  $\delta$  7.63 (d,  $J$  = 6.5 Hz, 2H), 7.61 (d,  $J$  = 7.0 Hz, 2H), 7.42 (t,  $J$  = 7.3 Hz, 2H), 7.37 (t,  $J$  = 7.3 Hz, 4H), 7.25 (d,  $J$  = 9.0 Hz, 2H), 6.87 (d,  $J$  = 9.0 Hz, 2H), 6.81 (ddd,  $J$  = 14.9, 7.4, 7.4 Hz, 1H), 6.23 (d,  $J$  = 9.0 Hz, 1H), 5.86 (d,  $J$  = 15.5 Hz, 1H), 5.33 (m, 1H), 4.78 (s, 1H), 4.76 (s, 1H), 4.60 (m, 1H), 4.44 (s, 2H), 4.27 (d,  $J$  = 12.0 Hz, 1H), 4.20 (m, 1H), 4.05 (m, 3H), 3.96 (m, 1H), 3.86 (m, 2H), 3.79 (s, 3H), 3.76 (d,  $J$  = 9.0 Hz, 1H), 3.67 (m, 2H), 3.57 (m, 1H), 3.50 (m, 1H), 3.43 (m, 1H), 3.37 (m, 1H), 3.27 (d,  $J$  = 10.0 Hz, 1H), 2.45 (ddd,  $J$  = 14.4, 7.1, 7.1 Hz, 1H), 2.39 (dd,  $J$  = 13.2, 4.8 Hz, 1H), 2.26 (m, 2H), 2.01 (m, 4H), 1.77–1.17 (m, 11H), 1.43 (s, 9H), 1.26 (s, 6H), 1.09 (s, 9H), 0.94 (m, 12H), 0.75 (m, 3H), 0.59 (m, 6H);  $^{13}\text{C}$  NMR (75 MHz)  $\delta$  165.9, 159.1, 141.6, 141.4, 135.64, 135.60, 134.0, 133.5, 130.4, 129.8, 129.7, 129.1, 127.7, 127.6, 125.2, 113.7, 110.5, 79.6, 75.3, 72.7, 71.1, 70.3, 69.9, 66.9, 65.83, 65.76, 55.2, 54.6, 52.3, 40.4, 40.2, 39.0, 38.7, 35.7, 35.4, 34.1, 32.4, 28.5, 27.0, 19.3, 6.9, 5.8, 5.0; HRMS calcd for  $\text{C}_{70}\text{H}_{106}\text{O}_{12}\text{N}_2\text{Si}_2$   $[\text{M}+\text{Na}]^+$  1245.7182, found 1245.7175. . Copies of  $^1\text{H}$  NMR and  $^{13}\text{C}$  NMR spectra of compound **8** are included below.

<sup>1</sup> Wang, B.; Hansen, T. M.; Wang, T.; Wu, D.; Weyer, L.; Ying, L.; Engler, M. M.; Sanville, M.; Leitheiser, C.; Christmann, M.; Lu, Y.; Chen, J.; Zunker, N.; Cink, R. D.; Ahmed, F.; Lee, C. S.; Forsyth, C. J. *J. Am. Chem. Soc.* **2010**, *132*, xxx.

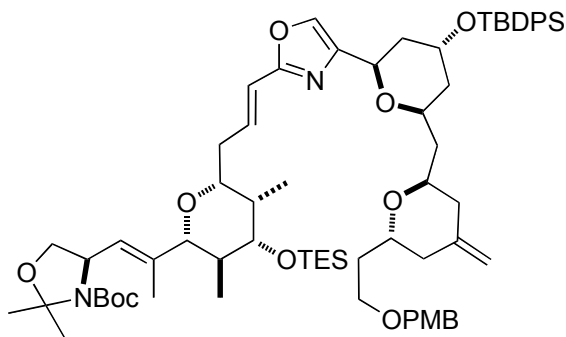

### Oxazole 10.

To a solution of amide **8** (145 mg, 118  $\mu\text{mol}$ ) in  $\text{CH}_2\text{Cl}_2$  (2.5 mL) were added *t*-butanol (0.25 mL),  $\text{NaHCO}_3$  (120 mg, 1.4 mmol) and Dess-Martin periodinane<sup>2</sup> (140 mg, 470  $\mu\text{mol}$ ). The mixture was stirred for 20 min then filtered through a plug of silica gel, eluting with hexanes : ethyl acetate (5:1 to 3:2, v/v). The eluent solution was concentrated to afford the aldehyde. This was dissolved in  $\text{CH}_2\text{Cl}_2$  (20 mL) and  $\text{Ph}_3\text{P}$  (151 mg, 0.59 mmol), *i*- $\text{Pr}_2\text{NEt}$  (630  $\mu\text{L}$ , 2.4 mmol) and 1,2-dibromo-1,1,2,2-tetrachloroethane [ $(\text{BrCCl}_2)_2$ , 187 mg, 0.59 mmol] were added sequentially. The resulting mixture was stirred for 30 min before diethyl ether and saturated aqueous  $\text{NH}_4\text{Cl}$  were added. The separated aqueous phase was extracted with diethyl ether. The combined organic phase was washed with brine, dried over  $\text{Na}_2\text{SO}_4$ , filtered, concentrated and purified by flash chromatography (hexanes–ethyl acetate, 4:1) to give **10** (129 mg, 107  $\mu\text{mol}$ , 91% for two steps) as an amorphous solid: mp 53-59  $^\circ\text{C}$ ;  $R_f$  0.65 (hexanes–ethyl acetate, 2:1);  $[\alpha]_D^{23} +1.9$  (*c* 0.83,  $\text{CHCl}_3$ ); IR 3080, 2960, 1700, 1515, 1385, 1245  $\text{cm}^{-1}$ ;  $^1\text{H}$  NMR (500 MHz)  $\delta$  7.67 (t,  $J = 8.0$  Hz, 4H), 7.39 (m, 7H), 7.23 (d,  $J = 8.5$  Hz, 2H), 6.85 (d,  $J = 8.5$  Hz, 2H), 6.64 (ddd,  $J = 15.5, 8.5, 6.5$  Hz, 1H), 6.33 (d,  $J = 16.0$  Hz, 1H), 5.35 (m, 1H), 5.01 (d,  $J = 11.5$  Hz, 1H), 4.76 (s, 1H), 4.72 (s, 1H), 4.62 (m, 1H), 4.40 (d,  $J = 11.5$  Hz, 1H), 4.36 (d,  $J = 11.5$  Hz, 1H), 4.31 (m, 1H), 4.19 (ddd,  $J = 11.0, 6.0, 6.0$  Hz, 1H), 4.04 (m, 2H), 3.90 (dddd,  $J = 8.0, 8.0, 4.0, 4.0$  Hz, 1H), 3.78 (s, 3H), 3.77 (m, 1H), 3.51 (m, 2H), 3.47 (ddd,  $J = 7.0, 7.0, 1.5$  Hz, 1H), 3.40 (m, 1H), 3.29 (d,  $J = 10.0$  Hz, 1H), 2.52 (ddd,  $J = 14.0, 6.8, 6.8$  Hz, 1H), 2.41 (dd,  $J = 13.0, 5.0$  Hz, 1H), 2.29 (m, 2H), 2.05-1.33 (m, 21H), 1.44 (s, 9H), 1.11 (s, 9H), 0.97 (m, 12H), 0.77 (m, 3H), 0.62 (m, 6H);  $^{13}\text{C}$  NMR (75 MHz)  $\delta$  161.0, 159.0, 142.9, 142.1, 136.0, 135.7, 135.6, 134.1, 134.0, 133.8, 130.6, 129.7, 129.6, 129.1, 127.62, 127.60, 118.4, 113.7, 110.2, 79.6, 77.3, 72.6, 69.3, 69.0, 68.7, 67.5, 66.7, 65.8, 55.2, 54.6, 40.1, 39.2, 39.0, 38.8, 38.4, 37.7, 36.4, 34.4, 34.1, 28.5, 27.0, 19.3, 6.9, 5.8, 5.0; HRMS calcd for  $\text{C}_{70}\text{H}_{102}\text{O}_{11}\text{N}_2\text{Si}_2$   $[\text{M}+\text{Na}]^+$  1225.6920, found 1225.6926. Copies of  $^1\text{H}$  NMR and  $^{13}\text{C}$  NMR spectra of compound **10** are included below.

<sup>2</sup> Dess-Martin periodinane was prepared following the procedure described in: Boeckman, Jr., R. K.; Shao, P.; Mullins, J. J. *Org. Synth.* **2004**, *Coll. Vol.* 10, 696.

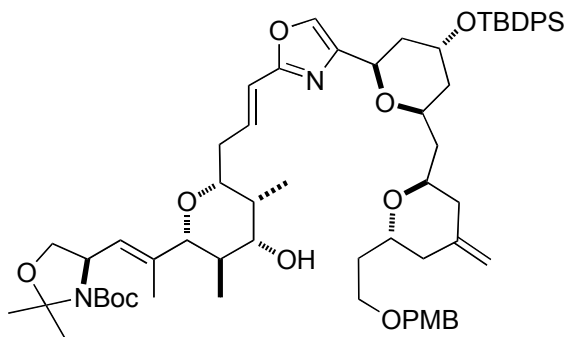

### Alcohol 11.

To a solution of **10** (129 mg, 107  $\mu\text{mol}$ ) in THF (10 mL) was added TBAF (1.0 M in THF, 214  $\mu\text{L}$ , 214  $\mu\text{mol}$ ). The solution was stirred for 2 h before diethyl ether and saturated aqueous  $\text{NH}_4\text{Cl}$  were added. The separated aqueous phase was extracted with diethyl ether. The combined organic phase was dried over  $\text{Na}_2\text{SO}_4$ , filtered, concentrated, and purified by flash chromatography (hexanes–ethyl acetate, 2:1) to give **11** (110 mg, 101  $\mu\text{mol}$ , 94%) as an amorphous solid: mp 65–69  $^\circ\text{C}$ ;  $R_f$  0.20 (hexanes–ethyl acetate, 2:1);  $[\alpha]_D^{23} +2.3$  ( $c$  1.03,  $\text{CHCl}_3$ ); IR 3470, 3070, 2930, 1730, 1690, 1380, 1240  $\text{cm}^{-1}$ ;  $^1\text{H}$  NMR (500 MHz)  $\delta$  7.67 (t,  $J = 7.8$  Hz, 4H), 7.42 (m, 3H), 7.37 (m, 4H), 7.22 (d,  $J = 8.5$  Hz, 2H), 6.84 (d,  $J = 8.5$  Hz, 2H), 6.62 (ddd,  $J = 16.0, 8.0, 6.5$  Hz, 1H), 6.33 (d,  $J = 16.0$  Hz, 1H), 5.37 (m, 1H), 5.00 (d,  $J = 11.5$  Hz, 1H), 4.76 (s, 1H), 4.72 (s, 1H), 4.62 (m, 1H), 4.40 (d,  $J = 11.5$  Hz, 1H), 4.35 (d,  $J = 11.5$  Hz, 1H), 4.31 (m, 1H), 4.18 (m, 1H), 4.04 (m, 2H), 3.90 (m, 1H), 3.78 (s, 3H), 3.77 (m, 1H), 3.51 (m, 3H), 3.42 (m, 1H), 3.32 (d,  $J = 10.0$  Hz, 1H), 2.54 (ddd,  $J = 13.5, 6.5, 6.5$  Hz, 1H), 2.41 (dd,  $J = 13.2, 4.8$  Hz, 1H), 2.34 (m, 1H), 2.30 (dd,  $J = 13.0, 3.5$  Hz, 1H), 2.05–1.33 (m, 22H), 1.44 (s, 9H), 1.10 (s, 9H), 0.96 (d,  $J = 6.5$  Hz, 3H), 0.84 (m, 3H);  $^{13}\text{C}$  NMR (75 MHz)  $\delta$  160.9, 159.0, 142.9, 142.1, 135.73, 135.66, 135.5, 134.2, 134.0, 133.9, 130.6, 129.71, 129.66, 129.2, 127.6, 118.6, 113.7, 110.2, 79.7, 77.3, 76.7, 72.6, 69.3, 69.0, 68.8, 67.5, 66.8, 65.8, 60.4, 55.2, 54.6, 40.1, 39.0, 38.9, 38.4, 37.9, 37.8, 36.1, 34.4, 33.8, 28.5, 27.0, 19.3, 14.2, 5.4; HRMS calcd for  $\text{C}_{64}\text{H}_{88}\text{O}_{11}\text{N}_2\text{Si}$   $[\text{M}+\text{Na}]^+$  1111.6055, found 1111.6047. Copies of  $^1\text{H}$  NMR and  $^{13}\text{C}$  NMR spectra of compound **11** are included below.

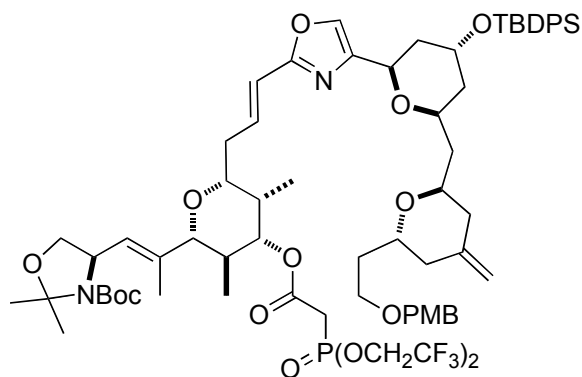

## Phosphonate 12.

To a solution of alcohol **11** (214 mg, 196  $\mu\text{mol}$ ) in  $\text{CH}_2\text{Cl}_2$  (20 mL) were added bis-(2,2,2-trifluoroethoxy)phosphono-acetic acid<sup>3</sup> (597 mg, 1.96 mmol), EDCI·HCl (583 mg, 1.96 mmol) and HOBT·H<sub>2</sub>O (15 mg, 10  $\mu\text{mol}$ ). The mixture was stirred for 12 h before diethyl ether and saturated aqueous  $\text{NH}_4\text{Cl}$  were added. The separated aqueous phase was extracted with diethyl ether. The combined organic phase was dried over  $\text{Na}_2\text{SO}_4$ , filtered, concentrated, and purified by flash chromatography (hexanes–ethyl acetate, 2:1) to give **12** (248 mg, 183  $\mu\text{mol}$ , 93%) as an amorphous solid: mp 50–55  $^\circ\text{C}$ ;  $R_f$  0.67 (hexanes–ethyl acetate, 1:1);  $[\alpha]_D^{23} +1.3$  ( $c$  1.59,  $\text{CHCl}_3$ ); IR 3070, 2940, 1735, 1690, 1510, 1385  $\text{cm}^{-1}$ ;  $^1\text{H}$  NMR (500 MHz)  $\delta$  7.67 (t,  $J$  = 8.0 Hz, 4H), 7.39 (m, 7H), 7.23 (d,  $J$  = 8.5 Hz, 2H), 6.85 (d,  $J$  = 8.5 Hz, 2H), 6.58 (ddd,  $J$  = 15.5, 8.5, 6.5 Hz, 1H), 6.32 (d,  $J$  = 16.0 Hz, 1H), 5.38 (m, 1H), 5.00 (d,  $J$  = 11.5 Hz, 1H), 4.76 (m, 2H), 4.71 (s, 1H), 4.61 (m, 1H), 4.46 (m, 4H), 4.40 (d,  $J$  = 11.5 Hz, 1H), 4.35 (d,  $J$  = 11.5 Hz, 1H), 4.30 (m, 1H), 4.18 (ddd,  $J$  = 10.5, 6.0, 6.0 Hz, 1H), 4.04 (m, 2H), 3.90 (dddd,  $J$  = 8.0, 8.0, 4.2, 4.2 Hz, 1H), 3.78 (s, 3H), 3.77 (m, 1H), 3.57 (ddd,  $J$  = 6.8, 6.8, 1.5 Hz, 1H), 3.51 (m, 2H), 3.40 (d,  $J$  = 10.0 Hz, 1H), 3.21 (s, 1H), 3.17 (s, 1H), 2.53 (ddd,  $J$  = 14.0, 6.8, 6.8 Hz, 1H), 2.40 (dd,  $J$  = 13.2, 4.8 Hz, 1H), 2.30 (m, 2H), 2.12–1.33 (m, 21H), 1.43 (s, 9H), 1.10 (s, 9H), 0.96 (d,  $J$  = 7.0 Hz, 3H), 0.75 (m, 3H);  $^{13}\text{C}$  NMR (75 MHz)  $\delta$  163.9, 160.7, 159.0, 151.7, 142.9, 142.0, 135.7, 135.6, 134.9, 134.2, 134.0, 133.8, 130.6, 129.65, 129.60, 129.1, 127.6, 124.2, 124.1, 120.5, 120.4, 118.8, 113.6, 110.1, 81.0, 79.6, 76.7, 72.5, 69.3, 69.0, 68.7, 67.9, 67.4, 66.7, 65.8, 63.3, 63.2, 62.74, 62.67, 62.24, 62.17, 61.73, 61.66, 60.3, 55.1, 54.5, 40.0, 39.0, 38.8, 38.3, 37.7, 35.9, 35.2, 34.9, 34.4, 33.0, 31.3, 28.4, 27.0, 20.9, 19.2, 14.1, 5.9; HRMS calcd for  $\text{C}_{70}\text{H}_{93}\text{F}_6\text{N}_2\text{O}_{15}\text{PSi}$   $[\text{M}+\text{Na}]^+$  1397.5879, found 1397.5882. Copies of  $^1\text{H}$  NMR and  $^{13}\text{C}$  NMR spectra of compound **12** are included below.

<sup>3</sup> Bis-(2,2,2-trifluoroethoxy)phosphonoacetic acid was prepared in quantitative yield by hydrogenation of the corresponding benzyl ester. The benzyl ester was prepared by substituting benzyl chloroformate in the procedure described in: Patois, C.; Savignac, P.; About-Jaudet, E.; Collignon, N. *Org. Synth.* **1995**, 73, 152–158.

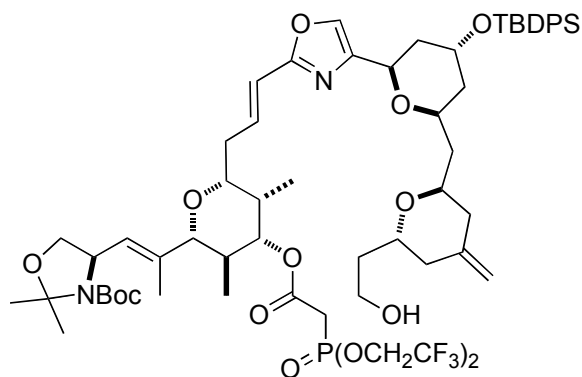

### Alcohol **12a**.

To a solution of **12** (140 mg, 102  $\mu$ mol) in  $\text{CH}_2\text{Cl}_2$  (23 mL) were added *t*-BuOH (2.3 mL), aqueous phosphate buffer (pH 7, 226  $\mu$ L) and DDQ (230 mg, 1.04 mmol). The mixture was immersed in an aqueous sonication bath and sonicated for 1.5 min before additional phosphate buffer (226  $\mu$ L, pH 7) and DDQ (230 mg, 1.04 mmol) were added and sonication continued for 2 min. Diethyl ether (80 mL) was added to the reaction mixture then it was washed with aqueous  $\text{NaHCO}_3$  (30 mL), water (30 mL), and brine (30 mL). The combined aqueous washes were extracted with diethyl ether (40 mL). The combined organic phases were dried over  $\text{MgSO}_4$ , filtered through a plug of silica gel and concentrated by rotary evaporation. Flash chromatography (hexanes–ethyl acetate, 1:1 to 2:3) of the residue afforded **12a** (117 mg, 102  $\mu$ mol, 100%) as an amorphous solid: mp 65–70  $^\circ\text{C}$ ;  $R_f$  0.18 (hexanes–ethyl acetate, 1:1);  $[\alpha]_D^{23} +2.9$  (*c* 1.37,  $\text{CHCl}_3$ ); IR 3490, 3070, 2940, 1740, 1695, 1390  $\text{cm}^{-1}$ ;  $^1\text{H}$  NMR (500 MHz)  $\delta$  7.65 (t,  $J$  = 8.5 Hz, 4H), 7.39 (m, 7H), 6.58 (ddd,  $J$  = 15.5, 8.5, 6.5 Hz, 1H), 6.31 (d,  $J$  = 16.0 Hz, 1H), 5.37 (m, 1H), 4.99 (dd,  $J$  = 11.5, 1.5 Hz, 1H), 4.76 (s, 1H), 4.73 (m, 1H), 4.71 (s, 1H), 4.60 (m, 1H), 4.45 (m, 4H), 4.32 (m, 1H), 4.17 (ddd,  $J$  = 10.8, 5.4, 5.4 Hz, 1H), 4.06 (m, 2H), 3.96 (dddd,  $J$  = 8.4, 8.4, 4.1, 4.1 Hz, 1H), 3.77 (d,  $J$  = 9.0 Hz, 1H), 3.69 (m, 2H), 3.57 (t,  $J$  = 6.5 Hz, 1H), 3.39 (d,  $J$  = 10.0 Hz, 1H), 3.20 (s, 1H), 3.16 (s, 1H), 2.89 (m, 1H), 2.52 (ddd,  $J$  = 14.0, 6.5, 6.5 Hz, 1H), 2.37 (dd,  $J$  = 13.2, 4.8 Hz, 1H), 2.28 (m, 2H), 2.05 (m, 4H), 1.96–1.38 (m, 17H), 1.42 (s, 9H), 1.09 (s, 9H), 0.95 (d,  $J$  = 7.0 Hz, 3H), 0.75 (m, 3H);  $^{13}\text{C}$  NMR (75 MHz)  $\delta$  163.9, 160.9, 151.7, 142.6, 141.8, 135.65, 135.63, 135.1, 134.3, 134.1, 133.8, 129.7, 127.6, 124.2, 124.1, 120.5, 120.4, 118.7, 110.3, 81.1, 79.7, 76.7, 70.3, 69.9, 69.7, 67.2, 65.8, 63.3, 63.2, 62.8, 62.7, 62.3, 62.2, 61.8, 61.7, 60.0, 54.5, 40.0, 39.0, 38.6, 38.5, 37.3, 36.2, 35.9, 35.3, 35.0, 33.1, 31.3, 28.4, 27.0, 19.3, 6.0; HRMS calcd for  $\text{C}_{62}\text{H}_{85}\text{F}_6\text{N}_2\text{O}_{14}\text{PSi}$   $[\text{M}+\text{Na}]^+$  1277.5310, found 1277.5315. Copies of  $^1\text{H}$  NMR and  $^{13}\text{C}$  NMR spectra of compound **12a** are included below.

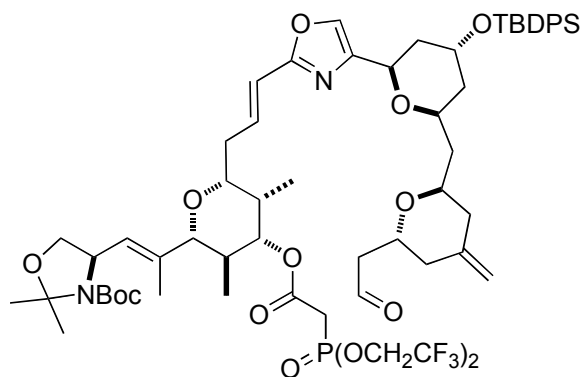

### Aldehyde **5**.

To a stirred, 0 °C solution of **12a** (100 mg, 800 μmol) in CH<sub>2</sub>Cl<sub>2</sub> (2 mL) were added NaHCO<sub>3</sub> (500 mg, 6.0 mmol) and Dess-Martin periodinane<sup>4</sup> (460 mg, 1.1 mmol). The cold bath was removed and the mixture was stirred for 20 min. The mixture was filtered through silica gel, eluting with hexanes–EtOAc (4:1), and the eluant was concentrated to give the derived aldehyde **5** (100 mg, 80 μmol, 100%) as an amorphous solid: mp 68-72 °C; *R*<sub>f</sub> 0.21 (hexanes–ethyl acetate, 2:1); IR 3070, 2930, 2860, 2730, 1725, 1695, 1385 cm<sup>-1</sup>; <sup>1</sup>H NMR (500 MHz) δ 9.71 (t, *J* = 2.3 Hz, 1H), 7.66 (t, *J* = 7.8 Hz, 4H), 7.42 (m, 3H), 7.37 (m, 4H), 6.59 (ddd, *J* = 15.6, 8.4, 6.5 Hz, 1H), 6.33 (d, *J* = 16.0 Hz, 1H), 5.38 (m, 1H), 5.01 (d, *J* = 12 Hz, 1H), 4.80 (s, 1H), 4.77 (s, 1H), 4.75 (m, 1H), 4.62 (m, 1H), 4.46 (m, 4H), 4.31 (m, 2H), 4.18 (m, 1H), 4.06 (m, 1H), 4.01 (m, 1H), 3.77 (d, *J* = 8.5 Hz, 1H), 3.57 (ddd, *J* = 7.0, 7.0, 1.5 Hz, 1H), 3.39 (d, *J* = 11.0 Hz, 1H), 3.21 (s, 1H), 3.17 (s, 1H), 2.57 (ddd, *J* = 16.0, 7.0, 2.5 Hz, 1H), 2.52 (m, 1H), 2.48 (ddd, *J* = 16.5, 6.0, 2.0 Hz, 1H), 2.41 (dd, *J* = 13.5, 4.5 Hz, 1H), 2.37 (dd, *J* = 13.0, 3.5 Hz, 1H), 2.30 (ddd, *J* = 14.3, 7.3, 7.3 Hz, 1H), 2.10-1.86 (m, 7H), 1.80-1.31 (m, 12H), 1.43 (s, 9H), 1.09 (s, 9H), 0.96 (d, *J* = 6.5 Hz, 3H), 0.75 (m, 3H); HRMS calcd for C<sub>62</sub>H<sub>83</sub>F<sub>6</sub>N<sub>2</sub>O<sub>14</sub>PSi [M+Na]<sup>+</sup> 1275.5153, found 1275.5155. A copy of the <sup>1</sup>H NMR spectrum compound **5** is included below.

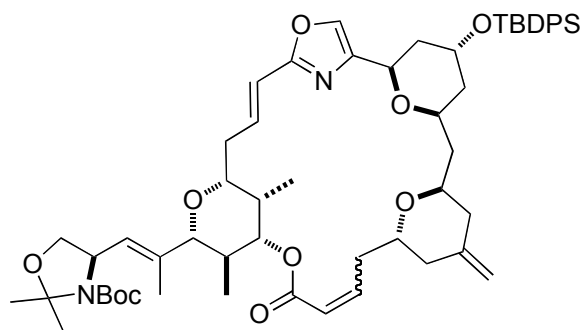

### Macrolides **14** and **15** (**14** : **15** = 4 : 1).

To a solution of 18-crown-6 (307 mg, 1.13 mmol) in toluene (98 mL) was added K<sub>2</sub>CO<sub>3</sub> (80 mg, 0.47 mmol), and the resulting suspension was stirred for 3 h, before a solution of **5** (120 mg, 95.7 μmol) in toluene (98 mL) was added. After stirring for 9 h, the mixture was diluted by diethyl ether (50 mL), washed with water (30 mL), and brine (30 mL). The separated aqueous phase was extracted with diethyl ether (3 × 50 mL) and the combined

organic phase was dried over Na<sub>2</sub>SO<sub>4</sub>, filtered, and concentrated. The residue was purified by flash chromatography (hexanes–ethyl acetate–CH<sub>2</sub>Cl<sub>2</sub>, 3:1:1) to afford a 4:1 mixture of (2Z)-**14**/(2E)-**15** (88 mg, 88.7 μmol, 93%): R<sub>f</sub> 0.21 (hexanes–ethyl acetate, 2:1); HRMS calcd for C<sub>58</sub>H<sub>78</sub>F<sub>6</sub>N<sub>2</sub>O<sub>10</sub>Si [M+Na]<sup>+</sup> 1013.5318, found 1013.5324. A copy of the <sup>1</sup>H NMR spectrum of the mixture of compounds **14** and **15** (**14** : **15** = 4 : 1) is included below.

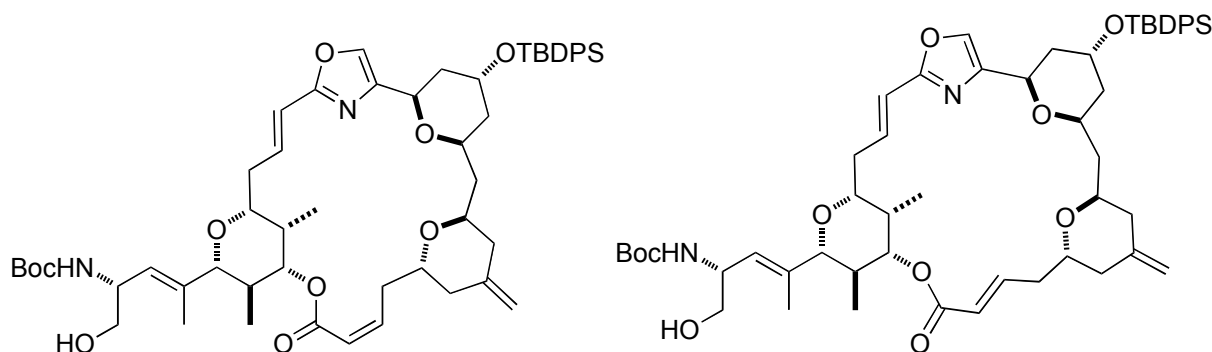

#### Alcohols **16** and **17**.

To a solution of **14** and **15** (**14** : **15** = 4 : 1, 73.4 mg, 74.0 μmol) in methanol (50 mL) was added *p*-TsOH·H<sub>2</sub>O (58.3 mg, 250 μmol). The resulting solution was stirred for 3 h. Ethyl acetate (180 mL) was added and the resulting mixture was washed with saturated aqueous NaHCO<sub>3</sub> (20 mL), and brine (20 mL), and the combined aqueous phases were extracted with ethyl acetate (2 × 20 mL). The combined organic phases were dried over MgSO<sub>4</sub>, filtered, and concentrated by rotary evaporation. The residue was eluted through a pad of silica gel, with ethyl acetate to afford a mixture of (2Z)-**16** and (2E)-**17** (**16** : **17** = 4 : 1, 57 mg, 60.0 μmol, 81%). Compounds **16** and **17** were initially purified by flash column chromatography then separated by preparative TLC (hexanes–ethyl acetate–CH<sub>2</sub>Cl<sub>2</sub>, 2:2:1). A sample of **16** was recrystallized from hexanes–ethyl acetate (4:1) for X-ray analysis.<sup>4</sup>

Analytical data for **16**: mp 182–184 °C; R<sub>f</sub> 0.31 (hexanes–ethyl acetate, 1:1); [α]<sub>D</sub><sup>23</sup> +20.8 (*c* 1.50, CHCl<sub>3</sub>); IR 3390, 3070, 2920, 1705 cm<sup>-1</sup>; <sup>1</sup>H NMR (500 MHz) δ 7.64 (t, *J* = 8.0 Hz, 4H), 7.40 (m, 7H), 6.71 (ddd, *J* = 16.0, 10.0, 6.0 Hz, 1H), 6.30 (d, *J* = 16.0 Hz, 1H), 5.93 (m, 2H), 5.32 (d, *J* = 9.0 Hz, 1H), 5.03 (s, 1H), 4.96 (m, 1H), 4.91 (d, *J* = 12.0 Hz, 1H), 4.64 (s, 1H), 4.47 (dd, *J* = 11.5, 4.5 Hz, 1H), 4.43 (m, 1H), 4.33 (m, 1H), 4.20 (m, 2H), 3.98 (m, 1H), 3.47 (m, 5H), 2.77 (d, *J* = 12.0 Hz, 1H), 2.55 (m, 2H), 2.41 (m, 3H), 2.29 (m, 1H), 2.08 (d, *J* = 13.5 Hz, 1H), 1.95 (m, 3H), 1.84 (ddd, *J* = 12.5, 12.5, 5.0 Hz, 1H), 1.77 (s, 3H), 1.75 (m, 1H), 1.54 (d, *J* = 15.0 Hz, 1H), 1.43 (s, 9H), 1.35 (m, 2H), 1.08 (s, 9H), 0.96 (d, *J* = 7.5 Hz, 3H), 0.73 (d, *J* = 7.0 Hz, 3H); <sup>13</sup>C NMR (75 MHz) δ 165.8, 161.3, 144.7, 142.2, 141.8, 137.0, 135.7, 134.1, 133.9, 133.8, 129.80, 129.76, 127.7, 126.9, 120.9, 119.3, 110.1, 89.2, 79.6, 78.1, 73.4, 69.0, 67.3, 65.8, 65.3, 50.6, 41.2, 39.2, 38.9, 37.0, 35.1, 34.4,

<sup>4</sup> Forsyth, C. J.; Ahmed, F.; Cink, R. D.; Lee, C. S. *J. Am. Chem. Soc.* **1998**, *120*, 5597–5598.

32.5, 31.1, 30.3, 28.3, 27.0, 19.3, 13.3, 11.8, 6.0.; HRMS calcd for C<sub>55</sub>H<sub>74</sub>N<sub>2</sub>O<sub>10</sub>Si [M+Na]<sup>+</sup> 973.5005, found 973.5009. Copies of <sup>1</sup>H NMR and <sup>13</sup>C NMR spectra of compound **16** are included below.

Analytical data for **17**: R<sub>f</sub> 0.35 (hexanes–ethyl acetate, 1:1); [α]<sub>D</sub><sup>23</sup> +13.3 (*c* 1.9, CHCl<sub>3</sub>); IR 3385, 3062, 2913, 1702 cm<sup>-1</sup>; <sup>1</sup>H NMR (500 MHz) δ 7.68 (m, 4H), 7.44 (m, 7H), 7.00 (m, 1H), 6.66 (m, 1H), 6.25 (d, *J* = 16.2 Hz, 1H), 5.93 (d, *J* = 15.3 Hz, 1H), 5.72 (d, *J* = 7.2 Hz, 1H), 5.64 (dd, *J* = 8.7 Hz, 1H), 5.06 (dd, *J* = 11.1, 3.6 Hz, 1H), 4.93 (m, 2H), 4.82 (s, 1H), 4.54 (m, 1H), 4.34 (m, 1H), 3.89 (m, 1H), 3.80-3.40 (m, 5H), 2.64 (d, *J* = 12.9 Hz, 1H), 2.53 (dd, *J* = 12.9, 4.8 Hz, 1H), 2.33 (m, 4H), 2.04 (m, 4H), 1.81 (s, 3H), 1.66 (d, *J* = 12.3 Hz, 2H), 1.47 (m, 12H), 1.16 (s, 9H), 0.95 (d, *J* = 6.6 Hz, 3H), 0.80 (d, *J* = 6.3 Hz, 3H); <sup>13</sup>C NMR (75 MHz) δ 167.3, 161.3, 155.7, 147.8, 141.9, 141.6, 135.5, 135.3, 134.0, 133.8, 133.7, 129.7, 128.4, 127.6, 127.59, 125.4, 122.2, 117.7, 111.0, 90.1, 78.8, 77.1, 70.4, 69.9, 68.4, 67.4, 66.1, 65.4, 65.0, 56.0, 49.6, 40.6, 40.1, 38.6, 37.9, 36.8, 34.9, 34.9, 34.8, 31.3, 30.2, 29.6, 28.3, 27.0, 19.3, 13.2, 11.5, 5.7; HRMS calcd for C<sub>55</sub>H<sub>74</sub>N<sub>2</sub>O<sub>10</sub>Si [M+Na]<sup>+</sup> 973.5005, found 973.5005. Copies of <sup>1</sup>H NMR and <sup>13</sup>C NMR spectra of compound **17** are included below.

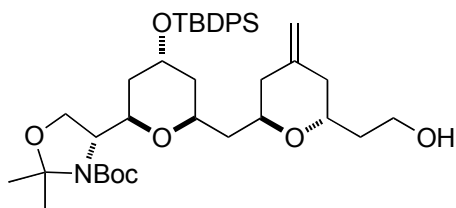

### Alcohol 51.

To a solution of PMB ether **20**<sup>1</sup> (171 mg, 210 μmol) in CH<sub>2</sub>Cl<sub>2</sub> (2 mL) were added *t*-BuOH (0.2 mL), aqueous phosphate buffer (pH 7, 0.2 mL), and DDQ (95 mg, 0.42 mmol). The mixture was immersed in an aqueous sonication bath and sonicated for 5 min before saturated aqueous NaHCO<sub>3</sub> and diethyl ether were added. The separated aqueous phase was extracted with diethyl ether and the combined organic phase was washed with brine, dried over Na<sub>2</sub>SO<sub>4</sub>, filtered, and concentrated. The residue was purified by flash chromatography (hexanes–ethyl acetate, 3:2) to give **51** (140 mg, 202 μmol, 96 %) as a colorless oil. R<sub>f</sub> 0.26 (hexanes–ethyl, 7:3 acetate); [α]<sub>D</sub><sup>23</sup> +1.1 (*c* 0.93, CHCl<sub>3</sub>); IR 3490, 3072, 2933, 2858, 1700, 1398, 1105 cm<sup>-1</sup>; <sup>1</sup>H NMR (500 MHz, a mixture of carbamate rotamers) δ 7.63 (m, 4H), 7.37 (m, 6H), 4.79 (s, 1H), 4.74 (s, 1H), 4.41-4.30 (d, *J* = 12.0 Hz, 1H), 4.26 (m, 1H), 4.10 (m, 1H), 4.04 (m, 1H), 3.98-3.94 (m, 2H), 3.86 (dd, *J* = 6.5, 9.0 Hz, 1H), 3.71 (m, 2H), 2.41 (d, *J* = 12.5 Hz, 1H), 2.29 (dt, *J* = 13.0, 3.5 Hz, 1H), 2.06 (m, 2H), 1.83 (m, 1H), 1.78 (dt, *J* = 7.5, 6.5 Hz, 1H), 1.63-1.43 (m, 21H), 1.32 (q, *J* = 12.0 Hz, 2H), 1.08 (d, *J* = 6.0 Hz, 9H); <sup>13</sup>C NMR (125 MHz, a mixture of carbamate rotamers) δ 152.6, 141.8, 135.8, 135.6, 133.8, 110.4, 93.9, 93.4, 80.3, 79.9, 71.1, 70.3, 69.8, 65.9, 63.6, 63.4, 60.8, 60.3, 59.3, 56.6, 40.3, 39.5, 38.7, 38.4, 36.5, 36.3, 32.7, 32.4, 28.4, 27.1, 27.0, 26.7, 25.9, 23.9, 22.5, 21.9, 19.4, 19.3, 14.2 1.1; HRMS calc. for C<sub>40</sub>H<sub>59</sub>NO<sub>7</sub>Si [M+Na]<sup>+</sup> 716.3959, found 716.3961. Copies of <sup>1</sup>H NMR and <sup>13</sup>C NMR spectra of compound **51** are included below.

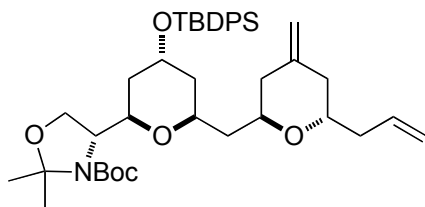

### Alkene 21.

Alcohol **51** (140 mg, 202  $\mu\text{mol}$ ) was dissolved in  $\text{CH}_2\text{Cl}_2$  (4 mL) and cooled to 0  $^\circ\text{C}$ .  $\text{NaHCO}_3$  (125 mg, 1.50 mmol) and Dess-Martin periodinane (300 mg, 700  $\mu\text{mol}$ ) were added. The cold bath was removed and the mixture was stirred for 20 min. Then the mixture was filtered through silica gel, eluted with hexanes and ethyl acetate (hexanes–ethyl acetate, 4:1), and the filtrate was concentrated to give the aldehyde as a colorless oil. To a 0  $^\circ\text{C}$  suspension of  $\text{Ph}_3\text{PCH}_3\text{Br}$  (536 mg, 1.45 mmol) in THF (5 mL) was added a solution of *n*-BuLi (0.57 mL, 1.4 mmol, 2.5 M in hexane) dropwise. The resulting orange mixture was stirred for 5 min before being warmed to rt then stirred for 30 min. A solution of the aldehyde in THF (2.5 mL) was added via cannula. The reaction mixture was stirred at rt for 10 min before saturated aqueous  $\text{NH}_4\text{Cl}$  and diethyl ether were added. The separated aqueous phase was extracted with diethyl ether. The combined organic phase was washed with brine, dried over  $\text{Na}_2\text{SO}_4$ , and concentrated. The residue was purified by flash chromatography (hexanes–ethyl acetate, 9:1) to give **21** (131 mg, 190  $\mu\text{mol}$ , 94%) as a colorless oil:  $R_f$  0.42 (hexanes–ethyl acetate, 9:1);  $[\alpha]_D^{23}$   $-4.0$  ( $c$  4.9,  $\text{CHCl}_3$ ); IR 3072, 2933, 2858, 1700, 1386, 1365, 1094  $\text{cm}^{-1}$ ;  $^1\text{H}$  NMR (500 MHz, a mixture of carbamate rotamers)  $\delta$  7.65 (m, 4H), 7.38 (m, 6H), 5.79 (ddt,  $J$  = 18.5, 10.0, 7.5 Hz, 1H), 5.06 (d,  $J$  = 18.5 Hz, 1H), 5.03 (d,  $J$  = 10.0 Hz, 1H), 4.79 (s, 1H), 4.76 (s, 1H), 4.46–4.32 (m, 1H), 4.26 (d,  $J$  = 13 Hz, 1H), 4.11–3.96 (m, 4H), 3.85 (dd,  $J$  = 9.0, 6.0 Hz, 1H), 3.82–3.78 (m, 1H), 2.40 (dd,  $J$  = 13.5, 4.0 Hz, 1H), 2.34–2.23 (m, 2H), 2.23 (dt,  $J$  = 14.5, 7.0 Hz, 1H), 2.04 (dd,  $J$  = 12.5, 6.0 Hz, 2H), 1.86 (dt,  $J$  = 14.0, 7.0 Hz, 1H), 1.78 (m, 1H), 1.64 (d,  $J$  = 13.5 Hz, 1H), 1.58 (d,  $J$  = 14.0 Hz, 1H), 1.51–1.43 (m, 15H), 1.33–1.27 (m, 2H), 1.09 (s, 9H);  $^{13}\text{C}$  NMR (125 MHz, a mixture of carbamate rotamers)  $\delta$  152.4, 142.2, 135.9, 135.7, 134.9, 134.1, 133.8, 129.6, 129.5, 127.8, 127.6, 116.9, 110.3, 93.9, 93.4, 81.1, 80.6, 80.1, 79.8, 79.1, 73.2, 71.6, 71.3, 70.9, 69.8, 69.3, 69.0, 66.0, 63.5, 63.3, 59.4, 39.2, 39.1, 39.0, 38.7, 38.4, 32.7, 32.3, 28.4, 27.1, 27.0, 25.9, 23.8, 22.4, 19.4, 19.3; HRMS calc. for  $\text{C}_{41}\text{H}_{59}\text{NO}_6\text{Si}$   $[\text{M}+\text{Na}]^+$  712.4009, found 712.4010. Copies of  $^1\text{H}$  NMR and  $^{13}\text{C}$  NMR spectra of compound **21** are included below.

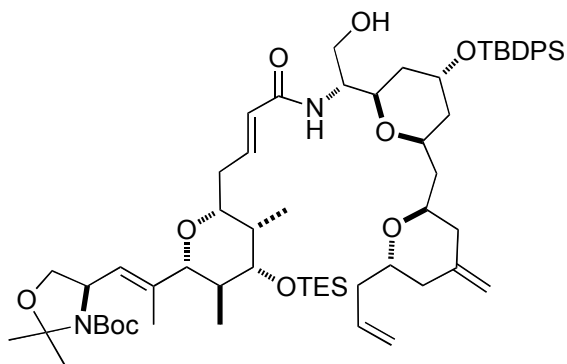

### Amide **23**.

To MeOH (0.5 mL) at 0 °C, was added acetyl chloride (20  $\mu$ L). After stirring for 20 min, this mixture was added to diene **21** (35 mg, 50  $\mu$ mol). After stirring at 0 °C for 2 h, the solvent was removed under a gentle flow of N<sub>2</sub>. The residue was dried in high vacuum for 1 h, dissolved CH<sub>2</sub>Cl<sub>2</sub> (0.5 mL) and treated with *i*-Pr<sub>2</sub>NEt (30  $\mu$ L, 110  $\mu$ mol). Then carboxylic acid **7**<sup>1</sup> (28 mg, 50  $\mu$ mol) in CH<sub>2</sub>Cl<sub>2</sub> (0.5 mL) was added followed by EDCI·HCl (14 mg, 75  $\mu$ mol) and HOBT·H<sub>2</sub>O (1.5 mg, 9  $\mu$ mol). The resulting mixture was stirred for 10 h. Separation of this mixture directly by flash chromatography (hexanes–ethyl acetate, 4:1 to 1:1) to give compound **23** (44 mg, 40  $\mu$ mol, 80%) as a colorless oil: *R*<sub>f</sub> 0.58 (hexanes–ethyl acetate, 1:1); [ $\alpha$ ]<sub>D</sub><sup>23</sup> –1.4 (*c* 0.86, CHCl<sub>3</sub>); IR 3436, 3073, 2956, 2877, 1700, 1387, 1105, 1077 cm<sup>–1</sup>; <sup>1</sup>H NMR (500 MHz, a mixture of carbamate rotamers)  $\delta$  7.66 (m, 4H), 7.45–7.35 (m, 7H), 6.80 (dt, *J* = 15.0, 8.5 Hz, 1H), 6.26 (d, *J* = 8.5 Hz, 1H), 5.87 (d, *J* = 15.5 Hz, 1H), 5.82 (m, 1H), 5.36–5.28 (m, 1H), 5.12 (dd, *J* = 14.5 Hz, 1H), 5.09 (d, *J* = 11.0 Hz, 1H), 4.80 (s, 1H), 4.76 (s, 1H), 4.63–4.56 (m, 1H), 4.26 (d, *J* = 11.5 Hz, 1H), 4.19 (m, 1H), 4.02 (m, 3H), 3.96 (m, 2H), 3.83 (m, 2H), 3.76 (d, *J* = 8.5 Hz, 1H), 3.69 (dd, *J* = 11.0, 4.0 Hz, 1H), 3.43 (dt, *J* = 7.5, 1.5 Hz, 1H), 3.36 (m, 1H), 3.27 (d, *J* = 10.0 Hz, 1H), 2.47 (m, 1H), 2.42 (dd, *J* = 13.5, 5.0 Hz, 1H), 2.25 (d, *J* = 14.5 Hz, 1H), 2.19 (m, 1H), 2.06 (d, *J* = 13.0 Hz, 1H), 1.99 (m, 1H), 1.74–1.62 (m, 3H), 1.56–1.36 (m, 12H), 1.43 (s, 9H), 1.36–1.25 (m, 3H), 1.19 (t, *J* = 4.0 Hz, 1H), 1.08 (s, 9H), 0.94 (m, 12H), 0.77 (m, 3H), 0.59 (m, 6H); <sup>13</sup>C NMR (75 MHz, a mixture of carbamate rotamers) (partial)  $\delta$  165.8, 141.7, 141.3, 135.7, 135.6, 135.2, 134.1, 133.7, 129.8, 129.7, 125.3, 116.7, 110.6, 80.4, 80.0, 79.9, 79.7, 75.6, 72.0, 71.4, 70.5, 66.1, 65.9, 54.6, 52.2, 41.0, 40.7, 39.5, 39.1, 38.8, 38.1, 36.5, 35.8, 35.4, 34.1, 29.7, 28.6, 27.0, 23.6, 22.7, 19.3, 14.2, 11.6, 7.1, 7.0, 6.1, 5.8, 5.7, 5.1, 5.0. HRMS calc. for C<sub>63</sub>H<sub>98</sub>N<sub>2</sub>O<sub>10</sub>Si<sub>2</sub> [M+Na]<sup>+</sup> 1121.6658, found 1121.6654. Copies of <sup>1</sup>H NMR and <sup>13</sup>C NMR spectra of compound **23** are included below.

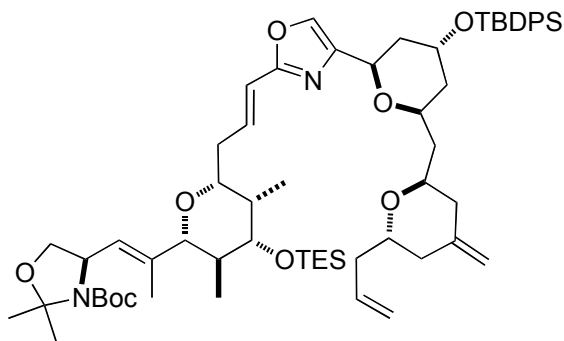

#### Oxazole 24.

To a solution of amide **23** (44 mg, 40  $\mu$ mol) in  $\text{CH}_2\text{Cl}_2$  (1 mL) were added *t*-BuOH (0.1 mL),  $\text{NaHCO}_3$  (32 mg, 0.38 mmol) and Dess-Martin periodinane<sup>2</sup> (48 mg, 0.16 mmol). The mixture was stirred for 20 min then filtered through a plug of silica gel, eluting with hexanes–ethyl acetate (5:1 to 3:2). Concentration of the eluent gave an *N*-acyl- $\alpha$ -aminoaldehyde, which was dissolved in  $\text{CH}_2\text{Cl}_2$  (2 mL).  $\text{Ph}_3\text{P}$  (52 mg, 0.20 mmol), *i*- $\text{Pr}_2\text{NEt}$  (220  $\mu$ L, 0.83 mmol) and  $(\text{BrCCl}_2)_2$  (65 mg, 0.20 mmol) were added sequentially. The resulting mixture was stirred for 30 min before diethyl ether and saturated aqueous  $\text{NH}_4\text{Cl}$  were added. The separated aqueous phase was extracted with diethyl ether. The combined organic phase was washed with brine, dried over  $\text{Na}_2\text{SO}_4$ , filtered, concentrated and purified by flash chromatography (hexanes–ethyl acetate, 4:1) to give compound **24** (38 mg, 35  $\mu$ mol, 87%) as an oil:  $R_f$  0.57 (hexanes–ethyl acetate, 4:1);  $[\alpha]_D^{23}$   $-19.1$  (*c* 2.8,  $\text{CHCl}_3$ ); IR 3072, 3048, 2955, 2876, 2861, 1700, 1387, 1105, 1078  $\text{cm}^{-1}$ ;  $^1\text{H}$  NMR (500 MHz, a mixture of carbamate rotamers)  $\delta$  7.67 (m, 4H), 7.38 (m, 6H), 6.62 (ddd,  $J$  = 15.0, 8.5, 6.5 Hz, 1H), 6.56 (s, 1H), 6.32 (d,  $J$  = 15.0 Hz, 1H); 5.78 (ddd,  $J$  = 18.5, 10.0, 7.5 Hz, 1H), 5.39-5.32 (m, 1H), 5.07 (d,  $J$  = 18.5 Hz, 1H), 5.02 (d,  $J$  = 10.0 Hz, 1H), 4.77 (s, 1H), 4.75 (s, 1H), 4.66-4.58 (m, 1H), 4.31 (m, 1H), 4.23 (m, 1H), 4.03 (m, 2H), 3.79 (m, 2H), 3.46 (ddt,  $J$  = 19.0, 11.5, 6.5 Hz, 1H), 3.40 (m, 1H), 3.30 (t,  $J$  = 10.5 Hz, 1H), 2.51 (m, 1H), 2.40 (dd,  $J$  = 13.5, 4.5 Hz, 1H), 2.35-2.27 (m, 4H), 2.22 (m, 2H), 2.02 (m, 4H), 1.78-1.22 (m, 23H), 1.10 (d,  $J$  = 7.5 Hz, 9H), 0.96 (m, 12H), 0.79 (m, 3H), 0.62 (m, 6H),  $^{13}\text{C}$  NMR (75 MHz, a mixture of carbamate rotamers)  $\delta$  161.0, 151.7, 142.8, 142.0, 136.0, 135.7, 135.6, 134.7, 134.1, 133.9, 133.7, 129.6, 127.6, 118.3, 116.8, 110.2, 93.7, 88.4, 82.6, 80.8, 79.6, 79.1, 71.7, 71.5, 70.9, 69.2, 68.9, 68.0, 67.2, 65.6, 54.5, 42.4, 40.3, 39.1, 39.0, 38.9, 38.7, 38.1, 38.0, 37.5, 36.3, 34.0, 33.5, 28.4, 26.9, 24.9, 23.4, 19.2, 13.8, 13.6, 13.1, 11.4, 6.9, 6.8, 5.6, 5.5, 4.8; HRMS calc. for  $\text{C}_{63}\text{H}_{94}\text{N}_2\text{O}_9\text{Si}_2$   $[\text{M}+\text{Na}]^+$  1101.6396, found 1101.6625. Copies of  $^1\text{H}$  NMR and  $^{13}\text{C}$  NMR spectra of compound **24** are included below.

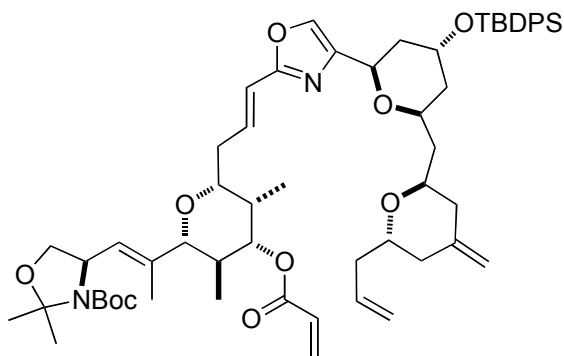

### Acrylate **19**.

To a solution of oxazole **24** (10 mg, 9.5  $\mu$ mol) in THF (0.2 mL) was added TBAF (50  $\mu$ L, 50  $\mu$ mol, 1 M in THF). The mixture was stirred for 10 min and then filtered through a plug of silica gel, eluting with hexanes–ethyl acetate (3:1) to give an alcohol. To a solution of acryloyl chloride (40  $\mu$ L, 0.5 mmol) in  $\text{CH}_2\text{Cl}_2$  (1 mL), at 0 °C, was added *i*-Pr<sub>2</sub>NEt (180  $\mu$ L, 1 mmol), and stirred 5 min. Then the alcohol in  $\text{CH}_2\text{Cl}_2$  (0.2 mL) was added. The resulting mixture was stirred at 0 °C for 10 min before saturated aqueous  $\text{NaHCO}_3$  was added. The separated aqueous phase was extracted with diethyl ether, and the combined organic phase was washed with brine, dried over  $\text{Na}_2\text{SO}_4$ , filtered, concentrated and purified by flash chromatography to give compound **19** (9.5 mg, 9.3  $\mu$ mol, 98 %) as an oil:  $R_f$  0.60 (hexanes–ethyl acetate, 7:3);  $[\alpha]_D^{23} +5.6$  (*c* 0.43,  $\text{CHCl}_3$ ); IR 3073, 2933, 2859, 1726, 1696, 1390, 1367, 1265, 1190, 1105  $\text{cm}^{-1}$ ;  $^1\text{H}$  NMR (500 MHz, a mixture of carbamate rotamers)  $\delta$  7.67 (t,  $J$  = 8.0 Hz, 4H), 7.45–7.35 (m, 7H), 6.60 (ddd,  $J$  = 15.5, 8.5, 6.5 Hz, 1H), 6.43 (d,  $J$  = 17.5 Hz, 2H), 6.32 (d,  $J$  = 16.0 Hz, 1H), 6.14 (dd,  $J$  = 17.5, 16.0 Hz, 1H), 5.85 (d,  $J$  = 15.5 Hz, 1H), 5.79 (ddt,  $J$  = 17.0, 9.5, 7.5 Hz, 1H), 5.43–5.32 (m, 1H), 5.05 (d,  $J$  = 17.0 Hz, 1H), 5.01 (d,  $J$  = 9.5 Hz, 1H), 4.76 (s, 1H), 4.73 (s, 1H), 4.65–4.58 (m, 1H), 4.31 (m, 1H), 4.21 (m, 1H), 4.06 (m, 1H), 4.00 (dd,  $J$  = 13.0, 5.0 Hz, 1H), 3.78 (m, 2H), 3.62 (m, 1H), 3.42 (d,  $J$  = 10.5 Hz, 1H), 2.54 (m, 1H), 2.40 (dd,  $J$  = 13.5, 5.0 Hz, 1H), 2.34–2.28 (m, 2H), 2.22 (q,  $J$  = 7.0 Hz, 1H), 2.11 (m, 1H), 2.06–1.98 (m, 3H), 1.88 (d,  $J$  = 13.0 Hz, 1H), 1.79–1.63 (m, 6H), 1.43 (m, 12H), 1.26 (s, 3H), 1.10 (s, 9H), 0.80 (d,  $J$  = 7.0 Hz, 3H), 0.78–0.66 (m, 6H);  $^{13}\text{C}$  NMR (75 MHz, a mixture of carbamate rotamers)  $\delta$  165.3, 160.8, 142.8, 142.0, 135.7, 135.6, 135.2, 134.7, 134.1, 133.9, 133.8, 130.8, 129.6, 128.4, 127.5, 118.6, 116.8, 79.6, 79.0, 78.6, 76.7, 70.9, 69.2, 68.9, 67.2, 65.6, 54.5, 39.9, 39.1, 39.0, 38.6, 38.0, 37.5, 35.9, 35.1, 31.8, 31.4, 30.2, 29.5, 28.4, 28.2, 26.9, 24.9, 22.5, 19.2, 14.0, 12.7, 11.1, 6.0, 0.8.; HRMS calc. for  $\text{C}_{60}\text{H}_{82}\text{N}_2\text{O}_{10}\text{Si}$   $[\text{M}+\text{Na}]^+$  1041.5636, found 1041.5633. Copies of  $^1\text{H}$  NMR and  $^{13}\text{C}$  NMR spectra of compound **19** are included below.

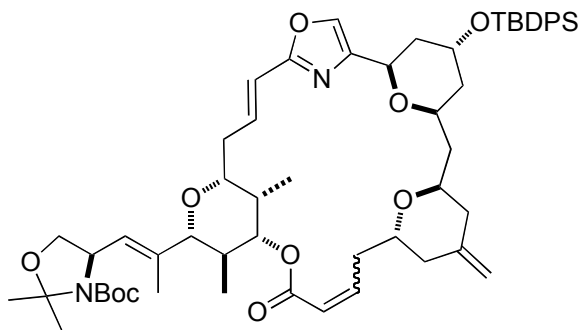

### Macrolides **14** and **15** (**14** : **15** > 10 : 1)

Preparation of **14** and **15** in hexane: To a solution of acrylate **19** (2.9 mg, 2.7  $\mu\text{mol}$ ) in argon-purged *n*-hexane (29 mL) at reflux was added a solution of Grubbs' second generation catalyst (0.6 mg, 0.7  $\mu\text{mol}$ ) in hexane (1 mL) dropwise over 45 min. The solution was maintained at reflux for an additional 15 min before it was cooled to 0 °C and filtered through a pad of silica gel. The filtrate was concentrated and chromatographed (hexanes–ethyl acetate, 6:1 to 4:1) to give a mixture of **14** and **15** (1.9 mg, 1.7  $\mu\text{mol}$ , 65%, > 10 : 1 ratio of **14** : **15** as assayed by  $^1\text{H}$  NMR spectroscopy). IR 3073, 2933, 2859, 1726, 1696, 1390, 1367, 1190, 1105  $\text{cm}^{-1}$ ; HRMS calc. for  $\text{C}_{60}\text{H}_{82}\text{N}_2\text{O}_{10}\text{Si}$   $[\text{M}+\text{Na}]^+$  1041.5636, found 1041.5633; A copy of the  $^1\text{H}$  NMR spectrum of the mixture of **14** and **15** (**14** : **15** > 10 : 1) thus prepared is included below.

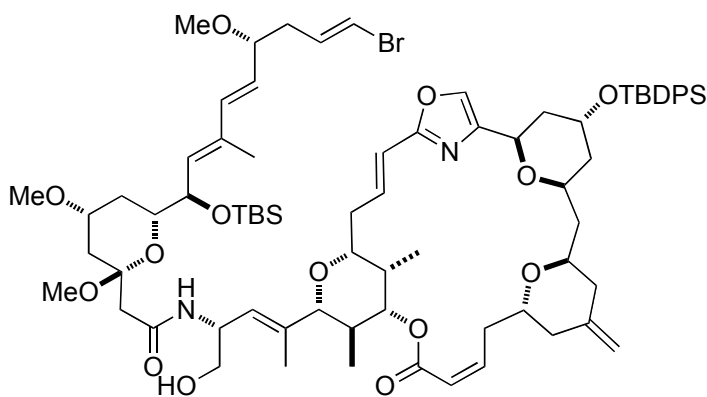

### (2Z)-Amide (**26**).

To a solution of (2Z)-macrolide **16** (2.0 mg, 2.1  $\mu\text{mol}$ ) in  $\text{CH}_2\text{Cl}_2$  (0.5 mL) was added TFA (50  $\mu\text{L}$ ). The solution was stirred for 30 min before the volatile components were removed under a stream of dry nitrogen. The residue was concentrated under high vacuum for 1 h before an aqueous phosphate buffer (pH 5.7, 0.5 mL) was added. The mixture was stirred for 30 min before it was extracted with diethyl ether ( $5 \times 2$  mL). The combined extracts were dried over  $\text{Na}_2\text{SO}_4$ , filtered, and concentrated to give the crude ammonium salt. To a stirred solution of acid **7**<sup>1</sup> (1.3 mg, 2.1  $\mu\text{mol}$ ) in  $\text{CH}_2\text{Cl}_2$  (0.5 mL) was added (7-azabenzotriazol-1-yloxy)-tris(pyrrolidino)phosphonium hexafluorophosphate (PyAOP, 1.1 mg, 2.1  $\mu\text{mol}$ ) and *i*- $\text{Pr}_2\text{NEt}$  (1.1  $\mu\text{L}$ , 6.2  $\mu\text{mol}$ ). The mixture was stirred for 1 min before a solution of the crude ammonium salt in  $\text{CH}_2\text{Cl}_2$  (0.5 mL)

was added. The reaction mixture was stirred for 1 h before diethyl ether (1 mL) was added and the resultant mixture washed with saturated aqueous NaHCO<sub>3</sub> (1 mL). The aqueous phase was extracted with diethyl ether (2 × 1 mL), and the combined organic phase was dried over Na<sub>2</sub>SO<sub>4</sub>, filtered, and concentrated. Silica gel column chromatography (hexanes–ethyl acetate, 1:1 to 1:2) of the residue gave hydroxy amide **26** (2.5 mg, 1.8 μmol, 85%) as white film: *R<sub>f</sub>* 0.51 (ethyl acetate); [ $\alpha$ ]<sub>D</sub><sup>23</sup> +19 (c 0.25, CHCl<sub>3</sub>); <sup>1</sup>H NMR (500 MHz)  $\delta$  7.65 (t, *J* = 7.8 Hz, 4H), 7.40 (m, 7H), 6.86 (d, *J* = 7.5 Hz, 1H), 6.71 (ddd, *J* = 16.0, 10.0, 6.0 Hz, 1H), 6.29 (d, *J* = 16.0 Hz, 1H), 6.19 (m, 2H), 6.10 (dd, *J* = 13.5, 1.0 Hz, 1H), 5.92 (m, 2H), 5.48 (dd, *J* = 15.8, 7.7 Hz, 1H), 5.40 (m, 1H), 5.03 (s, 1H), 4.91 (d, *J* = 12.0 Hz, 1H), 4.78 (m, 1H), 4.65 (s, 1H), 4.50 (dd, *J* = 9.5, 7.0 Hz, 1H), 4.47 (dd, *J* = 11.5, 4.5 Hz, 1H), 4.33 (m, 1H), 4.20 (m, 2H), 3.98 (m, 1H), 3.74 (dd, *J* = 11.0, 4.0 Hz, 1H), 3.65 (m, 2H), 3.60 (m, 1H), 3.50 (m, 3H), 3.43 (d, *J* = 10.0 Hz, 1H), 3.30 (s, 3H), 3.27 (s, 3H), 3.20 (s, 3H), 2.77 (d, *J* = 12.0 Hz, 1H), 2.74 (d, *J* = 14.5 Hz, 1H), 2.52 (m, 1H), 2.50 (d, *J* = 14.5 Hz, 1H), 2.42 (m, 2H), 2.29 (m, 5H), 2.08 (d, *J* = 15.0 Hz, 1H), 1.91 (m, 5H), 1.80 (d, *J* = 1.0 Hz, 1H), 1.79 (d, *J* = 1.0 Hz, 1H), 1.74 (m, 1H), 1.55 (d, *J* = 14.0 Hz, 1H), 1.36 (m, 3H), 1.12 (m, 1H), 1.08 (s, 9H), 0.95 (d, *J* = 7.0 Hz, 3H), 0.88 (s, 9H), 0.72 (d, *J* = 6.5 Hz, 3H), 0.07 (s, 3H), 0.03 (s, 3H); HRMS calc. for C<sub>76</sub>H<sub>109</sub>N<sub>2</sub>O<sub>14</sub>Si<sub>2</sub>Br [M+Na]<sup>+</sup> 1431.6498, found 1431.6597. A copy of <sup>1</sup>H NMR spectrum of compound **26** is included below.

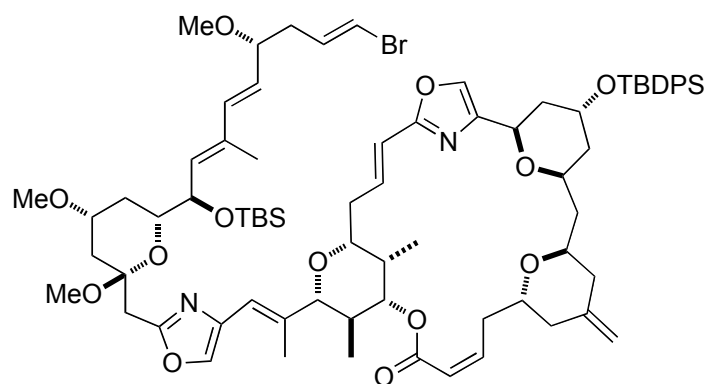

#### (2Z)-Bisoxazole (**27**).

NaHCO<sub>3</sub> (100 mg, 127 μmol), Dess-Martin periodinane<sup>2</sup> (50 mg, 80 μmol), and *t*-butanol (25 μL) were stirred in CH<sub>2</sub>Cl<sub>2</sub> (2.85 mL) for 5 min then cooled to 0 °C. A pre-cooled solution of amide **26** (5.7 mg, 4.0 μmol) in CH<sub>2</sub>Cl<sub>2</sub> (1.0 mL) was added. After stirring for 45 min, approximately one-half of the CH<sub>2</sub>Cl<sub>2</sub> solvent was evaporated from the reaction mixture with a stream of N<sub>2</sub>, and the volume was made up with diethyl ether. Dissolution was ensured by use of sonication. Flash column chromatography (diethyl ether) of the mixture gave the aldehyde free of Dess-Martin periodinane derived impurities. The diethyl ether was removed under a stream of N<sub>2</sub>, and the aldehyde was placed on the high vacuum for 30 min. To this crude aldehyde in CH<sub>2</sub>Cl<sub>2</sub> (3.0 mL) was sequentially added Ph<sub>3</sub>P (10 mg, 12.2 μmol), *i*-Pr<sub>2</sub>NEt (28 μL, 159 μmol) and (BrCCl<sub>2</sub>)<sub>2</sub> (12.7 mg, 12.2 μmol). The mixture was stirred for 9 h before additional *i*-Pr<sub>2</sub>NEt (50 μL) was added. After 2.5 h, the solution

was diluted with diethyl ether and saturated aqueous  $\text{NH}_4\text{Cl}$ . The separated aqueous phase was extracted with diethyl ether ( $3 \times 5$  mL). The combined organic phase was dried over  $\text{Na}_2\text{SO}_4$ , filtered, concentrated and purified by flash chromatography (hexanes–ethyl acetate, 2:1) to give bisoxazole **27** (4.0 mg, 2.8  $\mu\text{mol}$ , 71% for two steps) as a white film:  $R_f$  0.33 (hexanes–ethyl acetate, 3:2);  $[\alpha]_D^{23} +43.0$  (c 0.07,  $\text{CHCl}_3$ ); IR 3070, 2925, 2850, 1735, 1715, 1180, 1090  $\text{cm}^{-1}$ ;  $^1\text{H}$  NMR (500 MHz)  $\delta$  7.65 (t,  $J = 8.0$  Hz, 4H), 7.55 (s, 1H), 7.40 (m, 7H), 6.72 (ddd,  $J = 16.0, 10.0, 6.5$  Hz, 1H), 6.31 (d,  $J = 15.5$  Hz, 1H), 6.28 (s, 1H), 6.19 (m, 2H), 6.10 (dd,  $J = 13.5, 1.0$  Hz, 1H), 5.92 (m, 2H), 5.46 (dd,  $J = 15.8, 7.7$  Hz, 1H), 5.40 (d,  $J = 9.0$  Hz, 1H), 5.04 (s, 1H), 4.91 (d,  $J = 12.0$  Hz, 1H), 4.66 (s, 1H), 4.53 (dd,  $J = 11.3, 4.2$  Hz, 1H), 4.43 (dd,  $J = 9.5, 7.0$  Hz, 1H), 4.33 (m, 1H), 4.20 (m, 2H), 3.99 (m, 1H), 3.65 (q,  $J = 6.7$  Hz, 1H), 3.60 (d,  $J = 10.0$  Hz, 1H), 3.57 (m, 2H), 3.49 (m, 3H), 3.34 (s, 3H), 3.32 (d,  $J = 15.0$  Hz, 1H), 3.30 (s, 3H), 3.27 (s, 3H), 2.99 (d,  $J = 15.0$  Hz, 1H), 2.78 (d,  $J = 12.5$  Hz, 1H), 2.55 (m, 1H), 2.45 (m, 2H), 2.30 (m, 5H), 2.09 (d,  $J = 13.0$  Hz, 1H), 2.04 (m, 1H), 1.99 (s, 3H), 1.90 (m, 4H), 1.79 (s, 3H), 1.75 (m, 1H), 1.55 (m, 1H), 1.36 (m, 3H), 1.09 (s, 9H), 1.04 (m, 1H), 0.99 (d,  $J = 7.0$  Hz, 3H), 0.89 (s, 9H), 0.76 (d,  $J = 6.5$  Hz, 3H), 0.07 (s, 3H), 0.03 (s, 3H);  $^{13}\text{C}$  NMR (125 MHz)  $\delta$  165.6, 161.4, 159.3, 144.3, 142.4, 141.8, 137.9, 137.3, 136.2, 135.7, 134.2, 134.1, 133.9, 133.7, 132.4, 129.8, 128.1, 127.7, 125.5, 121.0, 119.3, 110.1, 106.3, 99.8, 89.3, 81.2, 79.5, 78.0, 73.6, 73.5, 72.1, 70.0, 69.1, 68.9, 67.2, 66.0, 56.6, 55.3, 55.6, 47.9, 41.4, 39.3, 39.1, 39.0, 38.9, 37.0, 35.6, 35.3, 34.4, 32.6, 31.8, 30.5, 30.3, 27.0, 25.8, 22.7, 21.1, 19.3, 18.2, 15.2, 14.2, 13.4, 13.4, 6.0, -4.5, -4.6; HRMS calc. for  $\text{C}_{76}\text{H}_{105}\text{N}_2\text{O}_{13}\text{Si}_2\text{Br}$   $[\text{M}+\text{Na}]^+$  1411.6236, found 1411.6245. Copies of  $^1\text{H}$  NMR and  $^{13}\text{C}$  NMR spectra of compound **27** are included below.

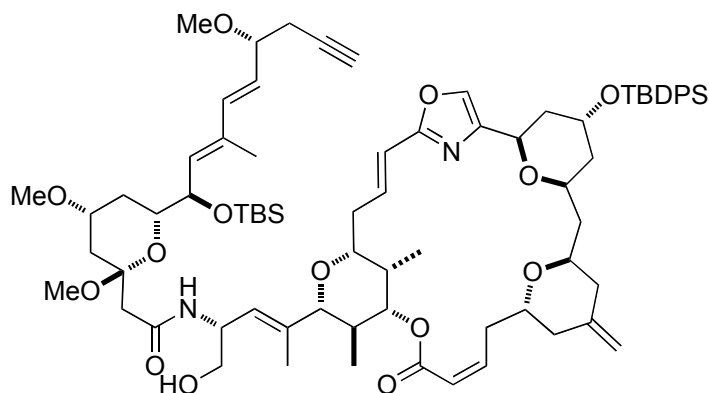

#### (2Z)-45,46-Dehydrobromo-amide (**32**).

To a solution of (2Z)-macrolide **16** (9.2 mg, 9.6  $\mu\text{mol}$ ) in  $\text{CH}_2\text{Cl}_2$  (2.3 mL) was added TFA (0.23 mL). The solution was stirred for 30 min and the volatile components were removed under a stream of  $\text{N}_2$ . The residue was dried under vacuum for 1 h before an aqueous phosphate buffer (pH 5.7, 2.4 mL) was added. The mixture was stirred for 1 h, then extracted with diethyl ether ( $5 \times 4$  mL). The combined extracts were dried over  $\text{Na}_2\text{SO}_4$ , filtered, and concentrated by rotary evaporation to give the crude ammonium salt. To a stirred solution of carboxylic acid **31**<sup>1</sup> (5.0 mg, 10  $\mu\text{mol}$ ) in  $\text{CH}_2\text{Cl}_2$  (2.4 mL) was added PyAOP (5.1 mg, 10  $\mu\text{mol}$ ) and *i*-

Pr<sub>2</sub>NEt (51  $\mu$ L, 0.32 mmol). The solution was stirred for 1 min before a solution of the crude ammonium salt of the macrolide in CH<sub>2</sub>Cl<sub>2</sub> (2.3 mL) was added. After stirring for 9 h, the reaction mixture was diluted with diethyl ether (5 mL) and washed with saturated aqueous NaHCO<sub>3</sub> (10 mL). The aqueous phase was extracted with diethyl ether (5  $\times$  5 mL), and the combined organic phase was dried over Na<sub>2</sub>SO<sub>4</sub>, filtered and concentrated. Flash column chromatography (hexanes–ethyl acetate, 1:1 to 1:2) gave **32** (12.1 mg, 9.1  $\mu$ mol, 92%) as a white film: *R*<sub>f</sub> 0.3 (hexanes–ethyl acetate, 1:2); [ $\alpha$ ]<sub>D</sub><sup>23</sup> +9.3 (c 0.22, CHCl<sub>3</sub>); IR 3374, 3311, 3070, 2927, 2856, 1717, 1653, 1521, 1461, 1428, 1360, 1302, 1248, 1188, 1158, 1092, 1052, 971, 938, 913, 887, 846, 776, 740, 702 cm<sup>-1</sup>; <sup>1</sup>H NMR (500 MHz)  $\delta$  7.64 (t, *J* = 7.0 Hz, 4H), 7.40 (m, 7H), 6.84 (d, *J* = 8.0 Hz, 1H), 6.70 (ddd, *J* = 16.0, 10.0, 6.0 Hz, 1H), 6.28 (dd, *J* = 12.0, 16.0 Hz, 1H), 5.92 (s, 2H), 5.62 (dd, *J* = 15.7, 7.5 Hz, 1H), 5.40 (dd, *J* = 21.5, 9.0 Hz, 1H), 5.02 (m, 2H), 4.95 (d, *J* = 11.5 Hz, 1H), 4.77 (m, 1H), 4.64 (s, 1H), 4.50 (dd, *J* = 9.5, 7.0 Hz, 1H), 4.47 (dd, *J* = 11.5, 4.5 Hz, 1H), 4.33 (app s, 1H), 3.80 (dd, *J* = 13.0, 6.0 Hz, 1H), 3.73 (m, 1H), 3.65 (m, 2H), 3.60 (m, 1H), 3.50 (m, 1H), 3.43 (d, *J* = 10.0 Hz, 1H), 3.30 (s, 3H), 3.29 (s, 3H), 3.20 (s, 3H), 2.77 (m, 1H), 2.74 (m, 1H), 2.52 (m, 1H), 2.50 (d, *J* = 14.5 Hz, 1H), 2.42 (m, 2H), 2.29 (m, 5H), 2.08 (d, *J* = 15.0 Hz, 1H), 1.91 (m, 5H), 1.80 (d, *J* = 1.0 Hz, 3H), 1.79 (d, *J* = 1.0 Hz, 3H), 1.74 (m, 1H), 1.55 (d, *J* = 14.0 Hz, 1H), 1.36 (m, 3H), 1.12 (m, 1H), 0.18 (s, 9H), 0.95 (d, *J* = 7.0 Hz, 3H), 0.88 (s, 9H), 0.72 (d, *J* = 6.5 Hz, 3H), 0.07 (s, 3H), 0.03 (s, 3H); <sup>13</sup>C NMR (75 MHz)  $\delta$  168.8, 165.5, 161.2, 144.3, 142.1, 141.6, 137.8, 136.9, 135.6, 134.1, 133.9, 133.6, 132.1, 129.6, 127.6, 126.1, 125.3, 120.9, 119.1, 109.9, 99.4, 88.8, 80.1, 79.3, 77.1, 73.7, 73.3, 73.0, 71.9, 69.9, 68.9, 68.8, 67.1, 65.8, 65.4, 56.5, 55.4, 49.1, 47.5, 43.8, 41.2, 39.2, 38.9, 37.8, 36.9, 35.1, 34.2, 31.1, 30.2, 29.6, 26.9, 25.7, 25.5, 22.6, 21.1, 19.2, 18.1, 13.3, 13.2, 11.9, 5.9, -4.5, -4.7; HRMS calcd for C<sub>76</sub>H<sub>108</sub>N<sub>2</sub>O<sub>14</sub>Si<sub>2</sub> [M+K]<sup>+</sup> 1367.6971, found 1367.6978. Copies of <sup>1</sup>H NMR and <sup>13</sup>C NMR spectra of compound **32** are included below.

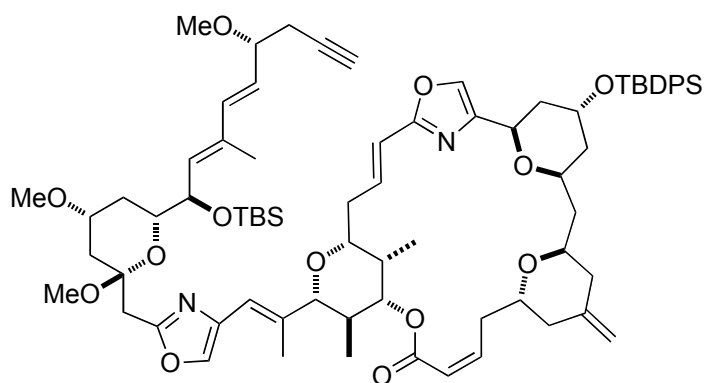

#### (2Z)-45,46-Dehydrobromo-bisoxazole (**33**).

NaHCO<sub>3</sub> (400 mg, 4.8 mmol), Dess-Martin periodinane<sup>2</sup> (381 mg, 0.9 mmol), and *t*-butanol (83  $\mu$ L, 0.9 mmol) were stirred in CH<sub>2</sub>Cl<sub>2</sub> (12 mL) for 5 min then cooled to 0 °C. A pre-cooled solution of amide **32** (19 mg, 14.1  $\mu$ mol) in CH<sub>2</sub>Cl<sub>2</sub> (0.55 mL) was added. After stirring for 45 min, one-half of CH<sub>2</sub>Cl<sub>2</sub> was evaporated under a

stream of N<sub>2</sub> and the original volume was made up with diethyl ether. Suspension of the resulting mixture was accomplished with sonication. Flash column chromatography (diethyl ether) of the mixture, followed by concentration gave the aldehyde free of Dess-Martin periodinane derived impurities. The diethyl ether was removed under a stream of N<sub>2</sub>, and the residual aldehyde was placed under high vacuum for 30 min. The aldehyde was then dissolved in CH<sub>2</sub>Cl<sub>2</sub> (10 mL), and Ph<sub>3</sub>P (50 mg, 0.19 mmol), *i*-Pr<sub>2</sub>NEt (135 μL, 0.77 mmol) and (BrCCl<sub>2</sub>)<sub>2</sub> (62 mg, 0.19 mmol) were sequentially added. The mixture was stirred for 9 h before additional *i*-Pr<sub>2</sub>NEt (135 μL, 0.77 mmol) was then added. After 2 h, diethyl ether and saturated aqueous NH<sub>4</sub>Cl were added. The separated aqueous phase was extracted with diethyl ether (3 × 5 mL). The combined organic phase was dried over Na<sub>2</sub>SO<sub>4</sub>, filtered, concentrated and purified by flash chromatography (hexanes–ethyl acetate, 2:1) to give bisoxazole **33** (12.6 mg, 9.6 μmol, 71% for two steps) as a white film: *R*<sub>f</sub> 0.4 (hexanes–ethyl acetate, 2:1); [α]<sub>D</sub><sup>23</sup> +56.5 (c 0.17, CHCl<sub>3</sub>); IR 3640, 3310, 3071, 3049, 2927, 2855, 2358, 2121, 1719, 1657, 1640, 1579, 1553, 1462, 1428, 1379, 1359, 1320, 1300, 1259, 1188, 1156, 1092, 1052, 938, 914, 887, 836, 813, 778, 739, 702, 665, 636, 609 cm<sup>-1</sup>; <sup>1</sup>H NMR (500 MHz) δ 7.65 (t, *J* = 8.0 Hz, 4H), 7.55 (s, 1H), 7.40 (m, 7H), 6.72 (ddd, *J* = 16.0, 10.0, 6.5 Hz, 1H), 6.31 (d, *J* = 15.5 Hz, 1H), 6.28 (s, 1H), 5.92 (m, 2H), 5.60 (dd, *J* = 15.8, 7.7 Hz, 1H), 5.40 (d, *J* = 9.0 Hz, 1H), 5.04 (s, 2H), 4.91 (d, *J* = 12.0 Hz, 1H), 4.66 (s, 1H), 4.53 (dd, *J* = 11.3, 4.2 Hz, 1H), 4.43 (dd, *J* = 9.5, 7.0 Hz, 1H), 4.33 (m, 1H), 4.20 (m, 2H), 3.99 (m, 1H), 3.82 (dd, *J* = 14.0, 6.5 Hz, 1H), 3.60 (d, *J* = 10.0 Hz, 1H), 3.57 (m, 2H), 3.49 (m, 2H), 3.34 (s, 3H), 3.32 (s, 3H), 3.30 (s, 3H), 2.99 (d, *J* = 15.0 Hz, 1H), 2.78 (d, *J* = 12.5 Hz, 1H), 2.55 (m, 1H), 2.45 (m, 2H), 2.30 (m, 4H), 2.29 (m, 3H), 2.09 (d, *J* = 13.0 Hz, 1H), 2.04 (m, 1H), 1.99 (s, 3H), 1.90 (m, 4H), 1.79 (s, 3H), 1.75 (m, 1H), 1.6–1.5 (m, 2H), 1.36 (m, 3H), 0.19 (s, 9H), 0.99 (d, *J* = 7.0 Hz, 3H), 0.89 (s, 9H), 0.76 (d, *J* = 6.5 Hz, 3H), 0.07 (s, 3H), 0.03 (s, 3H); <sup>13</sup>C NMR (125 MHz) δ 165.6, 161.4, 159.3, 144.4, 142.2, 141.7, 137.6, 137.1, 136.3, 135.7, 134.2, 134.0, 133.9, 133.8, 132.5, 129.8, 127.7, 127.4, 125.5, 121.0, 119.4, 119.2, 110.2, 99.8, 89.3, 80.6, 80.3, 79.4, 78.0, 73.6, 73.5, 72.1, 71.7, 71.5, 71.4, 70.0, 69.1, 68.9, 67.2, 65.9, 56.6, 55.7, 47.9, 41.3, 39.3, 39.1, 38.9, 37.0, 35.6, 35.2, 34.4, 32.6, 31.8, 30.5, 30.3, 29.7, 27.0, 25.8, 25.7, 19.3, 18.2, 14.2, 13.5, 13.3, 6.0, -4.5, -4.6; HRMS calcd for C<sub>76</sub>H<sub>104</sub>N<sub>2</sub>O<sub>13</sub>Si<sub>2</sub> [M+Na]<sup>+</sup> 1331.6973, found 1331.6976. Copies of <sup>1</sup>H NMR and <sup>13</sup>C NMR spectra of compound **33** are included below.

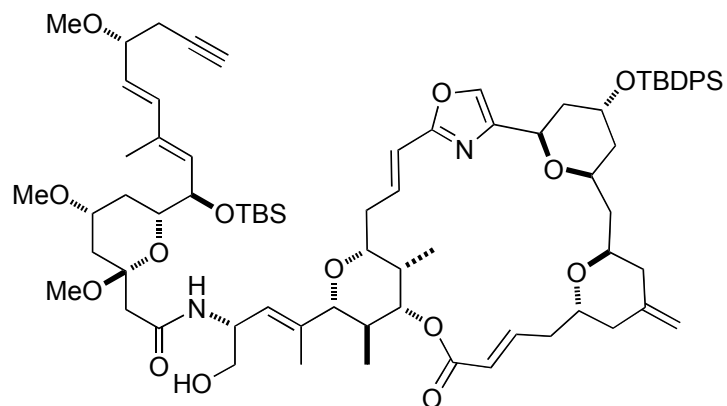

**(2E)-45,46-Dehydrobromo-amide (38).**

To a solution of (2E)-macrolide **17** (37 mg, 39  $\mu\text{mol}$ ) in  $\text{CH}_2\text{Cl}_2$  (10.5 mL) was added TFA (1.0 mL). The solution was stirred for 40 min before the volatile components were removed under a stream of  $\text{N}_2$ . The residue was dried under vacuum for 1 h before an aqueous phosphate buffer (pH 5.7, 11 mL) was added. The mixture was stirred for 1 h, then extracted with diethyl ether ( $5 \times 10$  mL). The combined extracts were dried over  $\text{Na}_2\text{SO}_4$ , filtered, and concentrated by rotary evaporation to give the crude ammonium salt. To a stirred solution of carboxylic acid **31**<sup>1</sup> (23 mg, 44  $\mu\text{mol}$ ) in  $\text{CH}_2\text{Cl}_2$  (10.5 mL) was added PyAOP (24 mg, 229  $\mu\text{mol}$ ) and *i*- $\text{Pr}_2\text{NEt}$  (230  $\mu\text{L}$ , 1.3 mmol). The solution was stirred for 1 min before a solution of the crude ammonium salt of the macrolide  $\text{CH}_2\text{Cl}_2$  (10.5 mL) was added. After stirring for 9 h, the reaction mixture was diluted with diethyl ether (20 mL) and washed with saturated aqueous  $\text{NaHCO}_3$  (20 mL). The aqueous phase was extracted with diethyl ether ( $5 \times 20$  mL), and the combined organic phase was dried over  $\text{Na}_2\text{SO}_4$ , filtered and concentrated. Flash column chromatography (hexanes–ethyl acetate, 1:1 to 1:2) gave **38** (52 mg, 37  $\mu\text{mol}$ , 96%) as a white film:  $R_f$  0.25 (hexanes–ethyl acetate, 1:2);  $[\alpha]_{\text{D}}^{23}$   $-45.5$  (c 0.25,  $\text{CHCl}_3$ ); IR 3374, 3311, 3071, 2930, 2856, 1709, 1654, 1526, 1461, 1427, 1379, 1359, 1324, 1308, 1248, 1153, 1089  $\text{cm}^{-1}$ ;  $^1\text{H}$ NMR (500 MHz)  $\delta$  7.64 (t,  $J$  = 6.0 Hz, 4H), 7.42 (m, 7H), 6.84 (d,  $J$  = 8.0 Hz, 1H), 6.58 (ddd,  $J$  = 16.0, 10.0, 6.0 Hz, 1H), 6.26 (dd,  $J$  = 15.5, 5.0 Hz, 1H), 5.87 (d,  $J$  = 15.5 Hz, 1H), 5.60 (dd,  $J$  = 16.0, 7.5 Hz, 1H), 5.40 (dd,  $J$  = 19.5, 8.5 Hz, 1H), 5.02 (m, 1H), 4.92 (d,  $J$  = 11.5 Hz, 1H), 4.84–4.77 (m, 2H), 4.48 (dd,  $J$  = 8.5, 6.5 Hz, 1H), 4.31 (s, 1H), 4.16 (m, 1H), 3.85 (m, 1H), 3.80 (m, 1H), 3.70 (m, 1H), 3.62 (m, 2H), 3.60 (m, 1H), 3.50 (m, 1H), 3.46 (d,  $J$  = 6.5 Hz, 1H), 3.43 (d,  $J$  = 9.5 Hz, 1H), 3.31 (s, 3H), 3.28 (s, 3H), 3.18 (s, 3H), 2.71 (m, 1H), 2.70 (m, 1H), 2.50–2.40 (m, 2H), 2.40–2.22 (m, 4H), 2.00–1.40 (m, 10H), 1.36 (d,  $J$  = 4.5 Hz, 3H), 1.12 (m, 1H), 0.18 (s, 9H), 0.95 (d,  $J$  = 7.0 Hz, 3H), 0.88 (s, 9H), 0.72 (d,  $J$  = 6.5 Hz, 3H), 0.07 (s, 3H), 0.03 (s, 3H);  $^{13}\text{C}$ NMR (75 MHz)  $\delta$  168.9, 167.00, 161.1, 146.9, 142.3, 141.4, 137.9, 137.0, 135.5, 134.1, 133.8, 132.1, 129.7, 127.6, 126.0, 125.4, 122.8, 118.6, 111.1, 99.4, 88.9, 80.4, 80.1, 78.3, 74.6, 73.6, 73.0, 71.9, 70.4, 70.2, 70.0, 68.4, 66.0, 65.7, 65.5, 56.6, 56.1, 55.5, 49.1, 47.6, 43.7, 40.3, 38.9, 38.2, 37.8, 36.5, 34.2, 31.3, 30.2, 29.6, 26.9, 25.7, 25.5, 19.2, 18.1, 13.3, 13.2, 11.9, 5.8,  $-4.5$ ,  $-4.7$ ; HRMS calcd for  $\text{C}_{76}\text{H}_{108}\text{N}_2\text{O}_{14}\text{Si}_2$   $[\text{M}+\text{Na}]^+$  1351.7231, found 1351.7239. Copies of  $^1\text{H}$  NMR and  $^{13}\text{C}$  NMR spectra of compound **38** are included below.

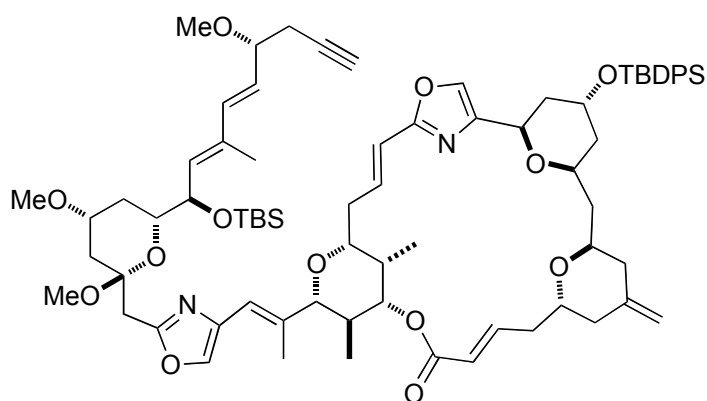

**(2E)- 45,46-Dihydrobromo-bisoxazole (39).**

NaHCO<sub>3</sub> (800 mg, 9.5 mmol), Dess-Martin periodinane<sup>2</sup> (790 mg, 1.9 mmol), and *t*-butanol (173  $\mu$ L, 1.9 mmol) were stirred in CH<sub>2</sub>Cl<sub>2</sub> (12 mL) for 5 min then cooled to 0 °C. A pre-cooled solution of amide **38** (38 mg, 28  $\mu$ mol) in CH<sub>2</sub>Cl<sub>2</sub> (12 mL) was added. After stirring for 45 min, one-half of CH<sub>2</sub>Cl<sub>2</sub> was evaporated under a stream of N<sub>2</sub> and the volume was made up with diethyl ether. The resulting mixture was briefly sonicated. Flash column chromatography (diethyl ether) of the mixture gave the aldehyde free of Dess-Martin periodinane derived impurities. The diethyl ether was removed under a stream of N<sub>2</sub>, and the aldehyde was placed under high vacuum for 30 min. To this crude aldehyde in CH<sub>2</sub>Cl<sub>2</sub> (21 mL) was added Ph<sub>3</sub>P (102 mg, 125  $\mu$ mol), *i*-Pr<sub>2</sub>NEt (300  $\mu$ L, 1.7 mmol) and (BrCCl<sub>2</sub>)<sub>2</sub> (127.3 mg, 0.19 mmol) sequentially. The mixture was stirred for 9 h before additional *i*-Pr<sub>2</sub>NEt (300  $\mu$ L, 125  $\mu$ mol) was added. After 2 h, the solution was diluted with diethyl ether (10 mL) and saturated aqueous NH<sub>4</sub>Cl. The separated aqueous phase was extracted with diethyl ether (3  $\times$  10 mL). The combined organic phase was dried over Na<sub>2</sub>SO<sub>4</sub>, filtered, concentrated and purified by flash chromatography (hexanes–ethyl acetate, 2:1) to give bisoxazole **39** (25 mg, 19  $\mu$ mol, 68% for two steps) as a white film: *R*<sub>f</sub> 0.5 (hexanes–ethyl acetate, 2:1); [ $\alpha$ ]<sub>D</sub><sup>23</sup> –11.4 (c 0.35, CHCl<sub>3</sub>); IR 2934, 1717, 1654, 1640, 1463, 1357, 1098, 911, 839 cm<sup>–1</sup>; <sup>1</sup>HNMR (500 MHz)  $\delta$  7.65 (t, *J* = 8.0 Hz, 4H), 7.55 (s, 1H), 7.40 (m, 7H), 6.72 (ddd, *J* = 16.0, 10.0, 6.5 Hz, 1H), 6.31 (d, *J* = 15.5 Hz, 1H), 6.28 (s, 1H), 5.92 (m, 2H), 5.46 (dd, *J* = 15.8, 7.7 Hz, 1H), 5.40 (d, *J* = 9.0 Hz, 1H), 5.04 (s, 2H), 4.91 (d, *J* = 12.0 Hz, 1H), 4.66 (s, 1H), 4.53 (dd, *J* = 11.3, 4.2 Hz, 1H), 4.43 (dd, *J* = 9.5, 7.0 Hz, 1H), 4.33 (m, 1H), 4.20 (m, 2H), 3.99 (m, 1H), 3.82 (dd, *J* = 14.0, 6.5 Hz, 1H), 3.60 (d, *J* = 10.0 Hz, 1H), 3.57 (m, 2H), 3.49 (m, 2H), 3.34 (s, 3H), 3.32 (s, 3H), 3.30 (s, 3H), 2.99 (d, *J* = 15.0 Hz, 1H), 2.78 (d, *J* = 12.5 Hz, 1H), 2.55 (m, 1H), 2.45 (m, 2H), 2.30 (m, 5H), 2.29 (m, 4H), 2.09 (d, *J* = 13.0 Hz, 1H), 2.04 (m, 1H), 1.99 (s, 3H), 1.90 (m, 4H), 1.79 (s, 3H), 1.75 (m, 1H), 1.6–1.5 (m, 2H), 1.36 (m, 3H), 0.19 (s, 9H), 0.99 (d, *J* = 7.0 Hz, 3H), 0.89 (s, 9H), 0.76 (d, *J* = 6.5 Hz, 3H), 0.07 (s, 3H), 0.03 (s, 3H); <sup>13</sup>CNMR (75 MHz)  $\delta$  166.9, 161.1, 159.1, 146.8, 142.3, 141.4, 137.7, 137.5, 137.0, 136.1, 135.5, 134.5, 134.0, 133.8, 133.7, 132.3, 129.7, 127.2, 125.4, 122.8, 119.2, 118.7, 110.0, 99.7, 89.3, 80.5, 80.2, 78.3, 76.7, 73.4, 73.3, 70.4, 69.9, 68.4, 66.0, 65.6, 56.5, 55.6, 47.9, 40.5, 40.3, 39.0, 38.9, 38.3, 37.5, 36.5, 35.5, 34.5, 34.3, 32.5, 32.0, 30.2,

29.6, 25.7, 25.6, 19.2, 18.1, 14.2, 13.4, 13.1, 5.9, -4.65, -4.71; HRMS calcd for  $C_{76}H_{104}N_2O_{13}Si_2$   $[M+Na]^+$  1331.6973, found 1331.6979. Copies of  $^1H$  NMR and  $^{13}C$  NMR spectra of compound **39** are included below.

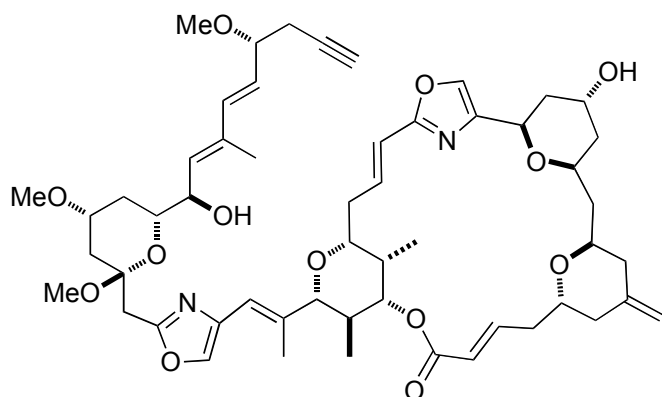

**(2E)-33-O-Methyl-45,46-Dehydrobromo-phorboxazole A (40).**

To bisoxazole **39** (0.7 mg, 0.5  $\mu$ mol) in ethyl acetate (0.5 mL) was added TBAF (1.0 M in THF, 0.2 mL, 0.2 mmol). The mixture was stirred for 5 d then washed with saturated aqueous  $NH_4Cl$  (0.5 mL). The aqueous phase was extracted with ethyl acetate ( $5 \times 1$  mL), and the combined organic phase was dried over  $Na_2SO_4$ , filtered, concentrated and purified by flash chromatography (EtOAc) to give **40** (0.4 mg, 0.4  $\mu$ mol, 80%) as a white film:  $R_f$  0.46 (ethyl acetate);  $[\alpha]_D^{23}$   $-31.7$  (c 1.2,  $CHCl_3$ ); IR 3447, 2929, 1643, 1456, 1371, 1180, 1156, 1092, 1040  $cm^{-1}$ ;  $^1H$  NMR (500 MHz)  $\delta$  7.58 (s, 1H), 7.43 (s, 1H), 6.61 (ddd,  $J = 16.5, 10.5, 5.0$  Hz, 1H), 6.31 (d,  $J = 6.5$  Hz, 1H), 6.28 (m, 2H), 5.64 (dd,  $J = 15.5, 7.5$  Hz, 1H), 5.49 (d,  $J = 9.0$  Hz, 1H), 4.76 (dd,  $J = 11.0, 3.5$  Hz, 1H), 4.87 (d,  $J = 12.0$  Hz, 1H), 4.78 (d,  $J = 12.0$  Hz, 1H), 4.40 (m, 2H), 4.07 (d,  $J = 9.5$  Hz, 1H), 3.95 (t,  $J = 11.0$  Hz, 1H), 3.80 (m, 1H), 3.74 (m, 1H), 3.67 (dd,  $J = 11.5, 5.4$  Hz, 1H), 3.60 (app d,  $J = 10.0$  Hz, 2H), 3.55-3.49 (m, 3H), 3.36 (s, 3H), 3.31 (s, 3H), 3.25 (d,  $J = 11.5$  Hz, 1H), 3.10 (d,  $J = 15.0$  Hz, 1H), 2.78 (m, 1H), 2.65 (m, 1H), 2.45 (m, 1H), 2.35 (app q,  $J = 10.5$  Hz, 1H), 2.25 (dd,  $J = 12.5, 4.0$  Hz, 1H), 2.04 (bd,  $J = 13.0$  Hz, 1H), 2.01 (t,  $J = 3.0$  Hz, 1H), 1.98 (s, 3H), 1.90 (m, 2H), 1.79 (s, 3H), 1.42 (ddd,  $J = 13.0, 10.0, 3.1$  Hz, 1H), 1.37 (q,  $J = 7.5$  Hz, 1H), 1.11 (m, 1H), 0.99 (d,  $J = 7.0$  Hz, 3H), 0.77 (d,  $J = 6.5$  Hz, 3H);  $^{13}C$  NMR (75 MHz)  $\delta$  161.0, 158.8, 142.0, 140.4, 137.7, 137.2, 137.0, 136.8, 136.3, 134.3, 134.1, 129.8, 128.2, 119.3, 118.9, 11.5, 99.9, 89.1, 80.4, 80.1, 79.4, 77.1, 75.0, 73.0, 72.8, 71.0, 69.9, 69.1, 67.4, 65.5, 64.3, 64.0, 57.7, 53.3, 49.4, 48.1, 43.5, 39.5, 39.0, 36.5, 35.5, 34.8, 34.6, 34.4, 32.7, 32.2, 29.6, 25.6, 20.6, 14.1, 13.9, 13.4, 13.1, 5.8; HRMS calc. for  $C_{54}H_{72}N_2O_{13}$   $[M+Na]^+$  979.4927, found 979.4933. Copies of  $^1H$  NMR and  $^{13}C$  NMR spectra of compound **40** are included below.

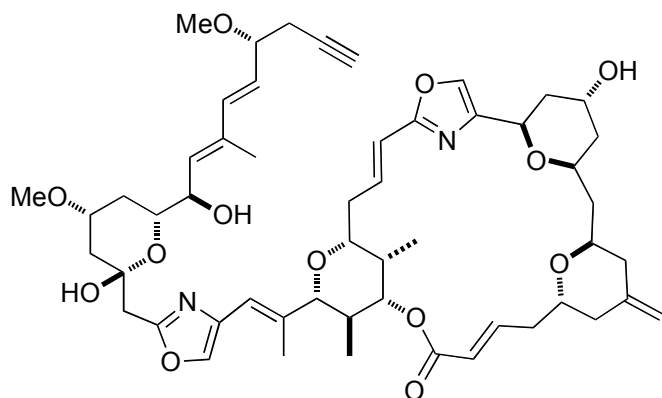

**(2E)-45,46-Dehydrobromo-phorboxazole A (41).**

To **40** (2.4 mg, 2.4  $\mu$ mol) in THF (3.0 mL) was added 6% aqueous HCl (0.7 mL). The mixture was stirred for 30 h, and washed with saturated aqueous NaHCO<sub>3</sub> (5.0 mL). The aqueous phase was extracted with ethyl acetate (5  $\times$  2 mL), and the combined organic phase was dried over Na<sub>2</sub>SO<sub>4</sub>, filtered, concentrated and purified by flash chromatography (ethyl acetate) to give **41** (1.6 mg, 1.6  $\mu$ mol, 67%) as a white film: *R<sub>f</sub>* 0.2 (ethyl acetate); [ $\alpha$ ]<sub>D</sub><sup>23</sup> -10.0 (c 0.7, CHCl<sub>3</sub>); IR 3414, 2961, 1744, 1650, 1411, 1357, 1323, 1260, 1188, 1091, 1015, 903, 871, 800 cm<sup>-1</sup>; <sup>1</sup>H NMR (800 MHz, CHCl<sub>3</sub>)  $\delta$  7.58 (m, 1H), 7.45 (s, 1H), 6.63 (ddd, *J* = 16.5, 10.5, 5.0 Hz, 1H), 6.31 (d, *J* = 6.5 Hz, 1H), 6.28 (s, 2H), 5.64 (dd, *J* = 15.5, 7.5 Hz, 1H), 5.37 (d, *J* = 9.0 Hz, 1H), 5.31 (d, *J* = 2.0 Hz, 1H), 5.00 (dd, *J* = 10.5, 4.0 Hz, 1H), 4.88 (d, *J* = 12.0 Hz, 1H), 4.78 (dd, *J* = 12.0, 2.0 Hz, 1H), 4.40 (m, 2H), 4.32 (t, *J* = 8.0 Hz, 1H), 4.07 (t, *J* = 10.5 Hz, 1H), 3.95 (t, *J* = 11.0 Hz, 1H), 3.80-3.74 (m, 5H), 3.67 (dd, *J* = 11.5, 5.5 Hz, 4H), 3.60 (d, *J* = 10.0 Hz, 1H), 3.55 (d, *J* = 2.0 Hz, 1H), 3.52 (d, *J* = 1.5 Hz, 1H), 3.33 (s, 3H), 3.32 (s, 3H), 3.15 (d, *J* = 15.5 Hz, 1H), 3.10 (d, *J* = 15.5 Hz, 1H), 2.65 (m, 1H), 2.45 (m, 5H), 2.35 (m, 4H), 2.25 (dd, *J* = 12.5, 4.0 Hz, 1H), 2.04 (bd, *J* = 13.0 Hz, 1H), 2.00 (t, *J* = 3.0 Hz, 1H), 1.98 (s, 3H), 1.90 (m, 2H), 1.79 (s, 3H), 1.42 (ddd, *J* = 13.0, 10.0, 3.1 Hz, 1H), 1.13 (q, *J* = 7.5 Hz, 1H), 1.11 (m, 1H), 0.99 (d, *J* = 7.0 Hz, 3H), 0.77 (d, *J* = 6.5 Hz, 3H); HRMS calc. for C<sub>54</sub>H<sub>72</sub>N<sub>2</sub>O<sub>13</sub> [M+Na]<sup>+</sup> 965.4771, found 965.4763; A copy of <sup>1</sup>H NMR spectrum of **41** is included below.

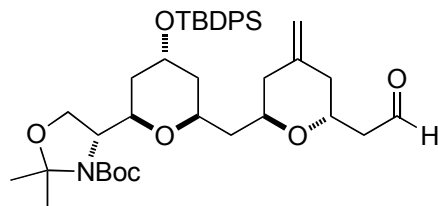

**Aldehyde 52.**

Alcohol **51** (100 mg, 144  $\mu$ mol) was dissolved in CH<sub>2</sub>Cl<sub>2</sub> (2.8 mL) and the solution was cooled to 0 °C. NaHCO<sub>3</sub> (89 mg, 1.0 mmol) and Dess-Martin periodinane (214 mg, 0.5 mmol) were added. The cold bath was removed and mixture was stirred for 20 min. Then the mixture was filtered through silica gel, eluted with hexanes–ethyl acetate (4:1), and the eluent was concentrated to give **52** (99 mg, 0.14 mmol, 99%) as a colorless

oil:  $R_f$  0.60 (hexanes–ethyl acetate, 7:3);  $[\alpha]_D^{23}$   $-0.3$  ( $c$  4.43,  $\text{CHCl}_3$ ); IR 3071, 2934, 2859, 1727, 1671, 1386, 1366, 1256, 1105, 1064  $\text{cm}^{-1}$ ;  $^1\text{H}$  NMR (500 MHz, a mixture of carbamate rotamers)  $\delta$  9.75 (s, 1H), 7.63 (m, 4H), 7.65 (m, 4H), 7.38 (m, 6H), 4.82 (s, 1H), 4.81 (s, 1H), 4.44–4.37 (m, 1H), 4.32 (d,  $J$  = 11.0 Hz, 1H), 4.26 (d,  $J$  = 13.0 Hz, 1H), 4.10–3.95 (m, 4H), 3.86 (dd,  $J$  = 9.0, 7.0 Hz, 1H), 2.64 (dt,  $J$  = 15.0, 7.5 Hz, 1H), 2.53 (m, 1H), 2.40 (m, 2H), 2.05 (m, 2H), 1.81 (ddd,  $J$  = 14.5, 7.5, 6.5 Hz, 0.5H), 1.74 (ddd,  $J$  = 13.5, 7.5, 6.5 Hz, 0.5H), 1.59–1.42 (m, 17H), 1.29 (m, 3H), 1.07 (d,  $J$  = 4.0 Hz, 9H);  $^{13}\text{C}$  NMR (125 MHz, a mixture of carbamate rotamers)  $\delta$  201.0, 200.7, 152.5, 152.4, 141.0, 135.8, 135.7, 135.6, 134.4, 134.0, 133.8, 129.8, 129.7, 129.6, 127.8, 127.7, 127.6, 112.7, 111.2, 11.1, 93.9, 93.4, 77.4, 77.1, 76.8, 71.0, 70.0, 69.5, 69.2, 69.0, 67.4, 67.3, 65.9, 63.6, 63.3, 59.4, 47.9, 39.7, 39.6, 39.2, 39.0, 38.7, 38.6, 32.7, 32.4, 29.7, 28.4, 27.0, 26.7, 25.9, 23.9, 22.5, 19.4, 19.3; HRMS calc. for  $\text{C}_{40}\text{H}_{57}\text{NO}_7\text{Si}$   $[\text{M}+\text{Na}]^+$  714.3802, found 714.3816. Copies of  $^1\text{H}$  NMR and  $^{13}\text{C}$  NMR spectra of compound **52** are included below.

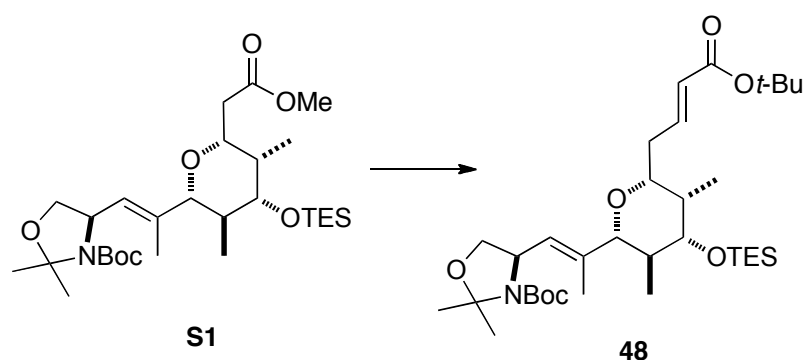

#### *t*-Butyl ester **48**

To a solution of ester **S1**<sup>1</sup> (445 mg, 801  $\mu\text{mol}$ ) in  $\text{CH}_2\text{Cl}_2$  (4 mL) at  $-78^\circ\text{C}$  was added diisobutylaluminum hydride (150  $\mu\text{L}$ , 840  $\mu\text{mol}$ ) dropwise. The resulting solution was allowed to stir for 5 h at  $-78^\circ\text{C}$ , before methanol (0.1 mL) was slowly added, followed by 10% aqueous HCl (5 mL) at  $-78^\circ\text{C}$ . Upon warming to rt, the aqueous layer was separated and extracted by diethyl ether ( $3 \times 10$  mL). The combined organic layers were dried over  $\text{Na}_2\text{SO}_4$ , filtered, and concentrated by rotary evaporation to give the crude aldehyde. To a portion of this aldehyde (69.2 mg, 131  $\mu\text{mol}$ ) in  $\text{CH}_3\text{CN}$  (0.65 mL) was added freshly prepared (*t*-butoxycarbonyl)methylene-triphenylphosphorane (86 mg, 228  $\mu\text{mol}$ ). After heating at  $60^\circ\text{C}$  for 14 h, the reaction mixture was cooled to rt, diluted with diethyl ether (10 mL) and washed with saturated aqueous  $\text{NH}_4\text{Cl}$  (10 mL). The aqueous phase was extracted with diethyl ether ( $3 \times 10$  mL), and the combined organic layers were dried over  $\text{Na}_2\text{SO}_4$ , filtered, and concentrated. The residue was subjected to flash column chromatography (hexanes–ethyl acetate, 5:1) to give **48** (55 mg, 98  $\mu\text{mol}$ , 75%) as a colorless oil:  $R_f$  0.4 (hexanes–ethyl acetate, 5:1);  $[\alpha]_D^{23}$   $+10.4$  ( $c$  2.8,  $\text{CHCl}_3$ ); IR 2976, 2961, 2875, 1698, 1653, 1457, 1385, 1365, 1250, 1155, 1105, 1076  $\text{cm}^{-1}$ ;  $^1\text{H}$  NMR (300 MHz, a mixture of carbamate rotamers)  $\delta$  6.84 (ddd,  $J$  = 13.8, 8.1, 6.3 Hz, 1H), 5.75 (d,  $J$  = 15.6 Hz, 1H), 5.33 (m, 1H), 4.55 (m, 1H), 3.99 (app t,  $J$  = 8.1 Hz, 1H), 3.73 (dd,  $J$  = 8.7, 1.2 Hz, 1H), 3.43–

3.34 (m, 3H), 3.24 (d,  $J = 10.2$  Hz, 1H), 2.41 (ddd,  $J = 14.0, 7.0, 7.0$  Hz, 1H), 2.20 (ddd,  $J = 14.0, 7.0, 7.0$  Hz, 1H), 1.70-1.50 (m, 11H), 1.43 (s, 9H), 1.39 (s, 9H), 0.90 (m, 12H), 0.74 (m, 3H), 0.56 (q,  $J = 7.8$  Hz, 6H);  $^{13}\text{C}$  NMR (75 MHz, a mixture of carbamate rotamers)  $\delta$  165.7, 151.7, 145.4, 143.9, 129.0, 127.7, 124.6, 105.3, 93.8, 88.5, 79.9, 79.5, 76.9, 68.8, 68.0, 54.5, 39.0, 35.4, 34.0, 28.4, 28.1, 28.0, 6.8, 5.6, 4.9; HRMS calcd. for  $\text{C}_{34}\text{H}_{61}\text{NO}_7\text{Si}$   $[\text{M}+\text{Na}]^+$  646.4110; found 646.4116. Copies of  $^1\text{H}$  NMR and  $^{13}\text{C}$  NMR spectra of compound **48** are included below.

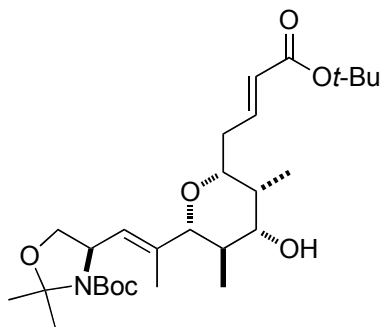

### Alcohol **53**.

To a 0 °C solution of **48** (90 mg, 0.14 mmol) in THF (1 mL) was added TBAF (0.16 mL, 1M in THF). The solution was stirred at rt for 30 min then concentrated. The residue was purified by flash chromatography (hexanes–ethyl acetate, 3:1) to give **53** (71 mg, 0.14 mmol, 97%) as a colorless oil:  $R_f$  0.32 (hexanes–ethyl acetate, 7:3);  $[\alpha]_D^{23} +2.7$  ( $c$  5.85,  $\text{CHCl}_3$ ); IR 3493, 2979, 2922, 2873, 1694, 1383, 1371, 1246, 1154, 1101, 1056  $\text{cm}^{-1}$ ;  $^1\text{H}$  NMR (500 MHz, a mixture of carbamate rotamers)  $\delta$  6.76 (ddd,  $J = 15.5, 8.5, 6.0$  Hz, 1H), 5.79 (d,  $J = 15.5$  Hz, 1H), 5.38-5.31 (m, 1H), 4.62-4.56 (m, 1H), 4.03 (m, 1H), 3.74 (d,  $J = 8.5$  Hz, 1H), 3.50 (dt,  $J = 7.0, 2.0$  Hz, 1H), 3.43 (m, 1H), 3.30 (d,  $J = 10.5$  Hz, 1H), 2.44 (ddd,  $J = 15.0, 7.0, 6.0$  Hz, 1H), 2.28 (ddd,  $J = 15.0, 8.5, 7.0$  Hz, 1H), 1.85 (dq,  $J = 5.0, 2.0$  Hz, 1H), 1.74 (m, 1H), 1.66 -1.41 (m, 27H), 0.92 (d,  $J = 7.0$  Hz, 3H), 0.84-0.79 (m, 3H);  $^{13}\text{C}$  NMR (125 MHz, a mixture of carbamate rotamers)  $\delta$  165.8, 151.9, 143.7, 135.9, 134.3, 129.3, 128.0, 124.8, 93.9, 93.2, 88.9, 88.4, 80.3, 79.7, 76.9, 76.5, 68.9, 68.0, 54.6, 38.0, 35.4, 33.7, 28.5, 28.3, 28.2, 28.1, 28.0, 27.6, 26.8, 25.1, 23.6, 13.7, 12.8, 11.6, 11.2, 5.4; HRMS calc. for  $\text{C}_{28}\text{H}_{47}\text{NO}_7$   $[\text{M}+\text{Na}]^+$  532.3250, found 532.3255. Copies of  $^1\text{H}$  NMR and  $^{13}\text{C}$  NMR spectra of **53** are included below.

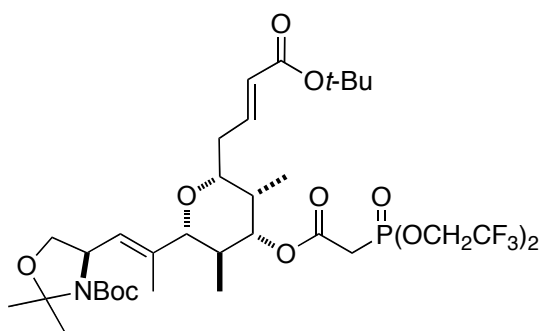

### Phosphonate **54**.

To a solution of alcohol **53** (71 mg, 0.14 mmol) in  $\text{CH}_2\text{Cl}_2$  (1.4 mL) was added bis(2,2,2-trifluoroethoxy)phosphono-acetic acid<sup>3</sup> (128 mg, 420  $\mu\text{mol}$ ) followed by EDCI·HCl (81 mg, 0.42 mmol) and HOBt (6 mg, 0.4 mmol). The mixture was stirred at rt for 20 min then chromatographed on silica gel (hexanes–ethyl acetate, 3:1) to give **54** (105 mg, 132  $\mu\text{mol}$ , 94%) as a colorless oil:  $R_f$  0.29 (hexanes–ethyl acetate, 7:3);  $[\alpha]_D^{23} +3.8$  ( $c$  2.92,  $\text{CHCl}_3$ ); IR 2979, 2937, 1733, 1700, 1394, 1367, 1299, 1266, 1172, 1102, 1074  $\text{cm}^{-1}$ ;  $^1\text{H}$  NMR (500 MHz, a mixture of carbamate rotamers)  $\delta$  6.76 (ddd,  $J = 15.5, 8.5, 6.0$  Hz, 1H), 5.80 (d,  $J = 15.5$  Hz, 1H), 5.42–5.36 (m, 1H), 4.75 (dd,  $J = 11.0, 4.0$  Hz, 1H), 4.62–4.59 (m, 1H), 4.46 (dq,  $J = 8.0, 1.5$  Hz, 4H), 4.06 (m, 1H), 3.76 (d,  $J = 8.5$  Hz, 1H), 3.55 (dt,  $J = 7.0, 2.0$  Hz, 1H), 3.39 (d,  $J = 10.5$  Hz, 1H), 3.21 (d,  $J_{P-H} = 21.5$  Hz, 2H), 2.45 (ddd,  $J = 15.0, 7.0, 6.0$  Hz, 1H), 2.24 (ddd,  $J = 15.0, 8.5, 7.0$  Hz, 1H), 2.05 (m, 1H), 1.91 (m, 1H), 1.77–1.40 (m, 27H), 0.94 (d,  $J = 7.0$  Hz, 3H), 0.77–0.71 (m, 3H);  $^{13}\text{C}$  NMR (125 MHz, a mixture of carbamate rotamers)  $\delta$  165.7, 164.0, 151.8, 143.0, 135.2, 133.5, 130.2, 128.6, 125.7, 125.6, 125.2, 123.5, 123.4, 121.3, 121.2, 119.1, 119.0, 112.7, 94.0, 93.1, 88.8, 88.1, 80.7, 80.3, 79.7, 78.8, 78.7, 76.4, 68.8, 67.9, 62.4, 54.6, 35.3, 34.6, 33.5, 31.4, 29.7, 28.5, 28.3, 28.1, 28.0, 27.5, 26.8, 25.1, 24.7, 23.5, 13.3, 12.7, 12.6, 11.5, 11.1, 6.0; HRMS calc. for  $\text{C}_{34}\text{H}_{52}\text{F}_6\text{NO}_{11}\text{P}$   $[\text{M}+\text{Na}]^+$  818.3080, found 818.3073. Copies of  $^1\text{H}$  NMR and  $^{13}\text{C}$  NMR spectra of **54** are included below.

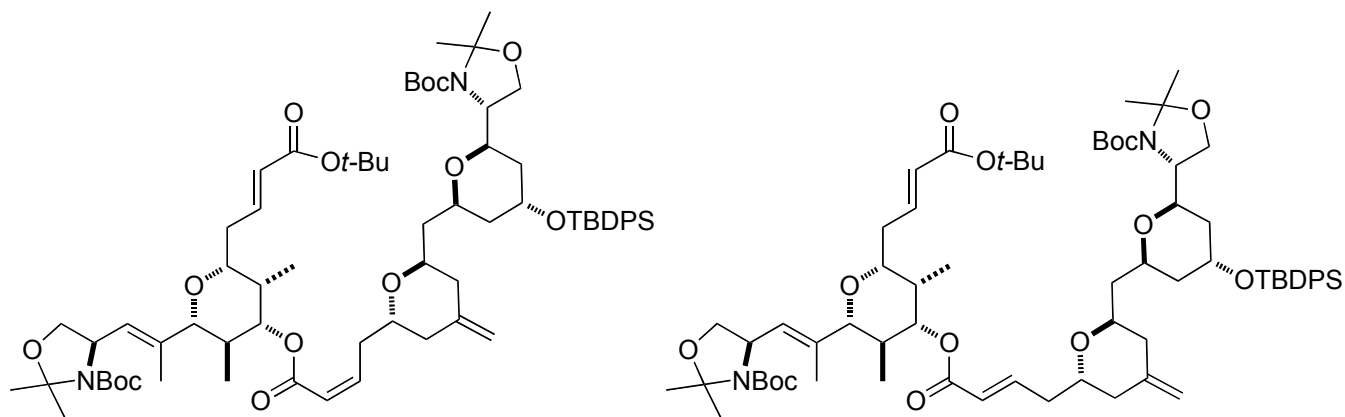

### Acrylate (2Z)-47 and (2E)-47.

To a solution of 18-crown-6 (391 mg, 1.48 mmol) in toluene (1.5 mL) was added  $\text{K}_2\text{CO}_3$  (102 mg, 738  $\mu\text{mol}$ ). The mixture was stirred for 10 h before being cooled to  $-40^\circ\text{C}$ . A solution of aldehyde **52** (98 mg, 0.12 mmol) and phosphonate **54** (85 mg, 0.12 mmol) in toluene (0.5 mL) was added. The resultant mixture was stirred at  $-40^\circ\text{C}$  for 2 h, then subjected directly to silica gel chromatography (hexanes–ethyl acetate, 3:1) to give a mixture of (2Z)-**47** and (2E)-**47** (2Z : 2E  $\approx$  3 : 1, as assayed by  $^1\text{H}$  NMR spectroscopy, 140 mg, 114  $\mu\text{mol}$ , 93%). Further flash chromatography provided (2Z)-**47** (98 mg, 80  $\mu\text{mol}$ , 65%) separated from (2E)-**8**.

Analytical data for (2Z)-**47**:  $R_f$  0.61 (hexanes–ethyl acetate, 7:3);  $[\alpha]_D^{23}$   $-4.8$  ( $c$  2.36,  $\text{CHCl}_3$ ); IR 3074, 3048, 2979, 2934, 2892, 2858, 1700, 1390, 1365, 1255, 1160, 1104, 1063  $\text{cm}^{-1}$ ;  $^1\text{H}$  NMR (500 MHz, a mixture of carbamate rotamers)  $\delta$  7.63 (m, 4H), 7.35 (m, 6H), 6.77 (ddd,  $J$  = 12.0, 8.0, 7.0 Hz, 1H), 6.38 (m, 1H), 5.79 (m, 2H), 4.78 (s, 1H), 4.75 (s, 1H), 4.71 (dd,  $J$  = 11.0, 4.5 Hz, 1H), 4.63–4.57 (m, 1H), 4.43 (d,  $J$  = 9.0 Hz, 0.5H), 4.32 (d,  $J$  = 10.5 Hz, 0.5H), 4.25 (m, 1H), 4.05 (m, 2H), 3.97 (t,  $J$  = 9.5 Hz, 1H), 3.94 (m, 1H), 3.88 (m, 1H), 3.84 (dd,  $J$  = 9.5, 6.5 Hz, 1H), 3.76 (d,  $J$  = 8.5 Hz, 1H), 3.58 (t,  $J$  = 6.0 Hz, 1H), 3.40 (d,  $J$  = 10.5 Hz, 1H), 2.95 (m, 1H), 2.81 (m, 1H), 2.45 (m, 1H), 2.40 (dd,  $J$  = 13.0, 3.5 Hz, 1H), 2.33 (appt,  $J$  = 13.0 Hz, 1H), 2.25 (m, 1H), 2.06 (m, 2H), 1.89 (m, 1H), 1.84 (m, 1H), 1.77–1.41 (m, 47H), 1.32–1.25 (m, 3H), 1.07 (d,  $J$  = 5.5 Hz, 9H), 0.92 (d,  $J$  = 6.5 Hz, 3H), 0.73–0.68 (m, 3H);  $^{13}\text{C}$  NMR (125 MHz, a mixture of carbamate rotamers)  $\delta$  165.8, 152.4, 151.8, 147.5, 143.4, 141.7, 135.7, 135.6, 134.4, 134.0, 133.7, 129.7, 129.5, 128.3, 127.7, 127.6, 125.1, 120.6, 112.4, 110.6, 93.9, 93.4, 89.0, 88.4, 80.3, 80.1, 79.7, 78.0, 76.6, 71.3, 70.9, 69.9, 69.5, 69.3, 69.1, 68.9, 68.0, 67.1, 65.9, 63.5, 63.3, 59.4, 54.6, 40.0, 39.8, 39.2, 38.9, 35.4, 33.9, 33.5, 32.7, 32.3, 31.7, 31.5, 30.3, 29.7, 28.6, 28.4, 28.2, 27.6, 27.0, 26.7, 25.9, 25.1, 24.7, 23.9, 23.6, 22.7, 22.4, 19.4, 15.3, 14.1, 13.5, 12.8, 11.7, 11.2, 6.3; HRMS calc. for  $\text{C}_{70}\text{H}_{104}\text{N}_2\text{O}_{14}\text{SiNa}^+$   $[\text{M}+\text{Na}]^+$  1247.7155, found 1247.7152. Copies of  $^1\text{H}$  NMR and  $^{13}\text{C}$  NMR spectra of (2Z)-**47** are included below.

Analytical data for (2E)-**47**:  $R_f$  0.61 (hexanes–ethyl acetate, 7:3);  $[\alpha]_D^{23}$   $+1.89$  ( $c$  3.91,  $\text{CHCl}_3$ );  $^1\text{H}$  NMR (500 MHz, a mixture of carbamate rotamers)  $\delta$  7.63 (m, 4H), 7.35 (m, 6H), 6.93 (m, 1H), 6.77 (ddd,  $J$  = 15.0, 8.0, 6.0

Hz, 1H), 5.86 (d,  $J = 15.5$  Hz, 1H), 5.78 (d,  $J = 15.5$  Hz, 1H), 5.42-5.35 (m, 1H), 4.87 (s, 1H), 4.78 (app d,  $J = 6.5$  Hz, 1H), 4.73 (dd,  $J = 10.5, 3.5$  Hz, 1H), 4.63-4.58 (m, 1H), 4.44 (d,  $J = 9.0$  Hz, 0.5H), 4.32 (d,  $J = 10.5$  Hz, 0.5H), 4.25 (d,  $J = 15.5$  Hz, 1H), 4.05 (m, 4H), 4.00 (d,  $J = 15.5$  Hz, 1H), 3.95 (t,  $J = 5.0$  Hz, 0.5H), 3.90 (app q,  $J = 4.0$  Hz, 0.5H), 3.85 (dd,  $J = 9.0, 6.5$  Hz, 1H), 3.77 (d,  $J = 8.5$  Hz, 1H), 3.60 (t,  $J = 5.5$  Hz, 1H), 3.41 (d,  $J = 10.5$  Hz, 1H), 2.43-2.39 (m, 4H), 2.33 (dq,  $J = 14.0, 2.5$  Hz, 1H), 2.25 (m, 1H), 2.08-2.02 (m, 3H), 1.92 (m, 1H), 1.78-1.70 (m, 4H), 1.62-1.20 (m, 44H), 1.08 (d,  $J = 6.5$  Hz, 9H), 0.93 (d,  $J = 7.0$  Hz, 3H), 0.75-0.70 (m, 3H);  $^{13}\text{C}$  NMR (125 MHz, a mixture of carbamate rotamers)  $\delta$  165.8, 152.4, 141.5, 135.8, 135.7, 135.6, 134.0, 129.8, 129.7, 127.6, 127.7, 127.6, 125.1, 93.9, 93.4, 80.3, 80.1, 79.8, 79.7, 78.3, 77.3, 76.6, 71.0, 70.8, 69.3, 68.9, 65.9, 63.5, 59.4, 54.7, 39.2, 38.9, 38.5, 36.7, 35.4, 35.3, 32.4, 31.6, 30.3, 29.7, 28.4, 28.2, 28.1, 27.0, 26.7, 26.9, 23.9, 22.7, 22.4, 19.4, 19.3, 14.1, 6.2; HRMS calc. for  $\text{C}_{70}\text{H}_{104}\text{N}_2\text{O}_{14}\text{SiNa}^+$   $[\text{M}+\text{Na}]^+$  1247.7155, found 1247.7152. Copies of  $^1\text{H}$  NMR and  $^{13}\text{C}$  NMR spectra of (2*E*)-**47** are included below.

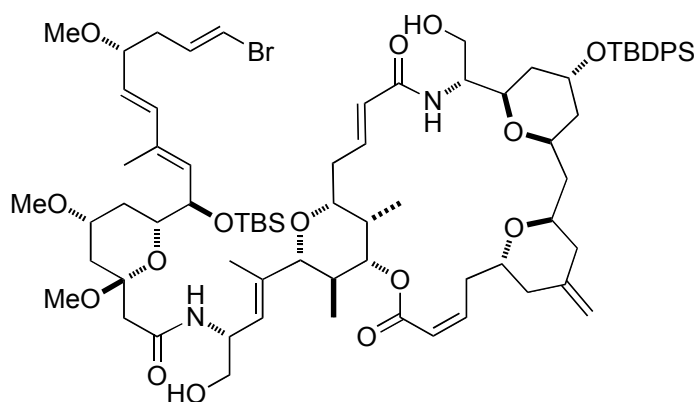

#### Bisamide 44.

To a solution of (2*Z*)-**47** (38 mg, 31  $\mu\text{mol}$ ) in  $\text{CH}_2\text{Cl}_2$  (2.5 mL) under argon was added freshly distilled trifluoroacetic acid (TFA, 2.5 mL). The solution was stirred for 50 min before the TFA and  $\text{CH}_2\text{Cl}_2$  were removed under a gentle flow of nitrogen gas. The residue was further concentrated under high vacuum for 10 min and then stirred in a mixture of pH 5.7 aqueous phosphate buffer and  $\text{CHCl}_3$  for 50 min. The separated aqueous phase was extracted with  $\text{CHCl}_3$ . The combined organic phase was dried over  $\text{Na}_2\text{SO}_4$ , concentrated, and further dried under high vacuum for 12 h to give **46** as a solid white bis-ammonium salt. This solid was dissolved in DMF (33 mL) and *i*- $\text{Pr}_2\text{NEt}$  (0.3 mL) with the aid of sonication. A solution of pentafluorophenol diphenylphosphinate (30 mg, 78  $\mu\text{mol}$ ) in DMF (1 mL) was added over 1 h. After stirring for an additional 3 h, additional pentafluorophenol diphenylphosphinate (6 mg, 16  $\mu\text{mol}$ ) in DMF (1 mL) was added over 0.5 h. The mixture was stirred for an additional 3 h to completely generate lactam-lactone **49** *in situ* (monitored by ESI-TOF-HRMS analysis). In a separate vial, carboxylic acid **7**<sup>1</sup> (18 mg, 31  $\mu\text{mol}$ ) was dissolved in DMF (2 mL) and *i*- $\text{Pr}_2\text{NEt}$  (50  $\mu\text{L}$ ) before PyAOP (16 mg, 31  $\mu\text{mol}$ ) was added. The mixture was gently shaken for 1 min before being added to the mixture of *in situ* generated **46**. The resultant mixture was stirred for 10 min before

methanol (2 mL) was added and the mixture was concentrated by rotary evaporation under high vacuum. The residue was subjected to flash chromatography (CHCl<sub>3</sub>–MeOH, 1:0 to 100:1 to 70:1 to 50:1 to 30:1) to give **44** (37.5 mg) accompanied by impurities: *R<sub>f</sub>* 0.42 (CHCl<sub>3</sub>–MeOH, 12:1); HRMS calc. for C<sub>76</sub>H<sub>113</sub>BrN<sub>2</sub>O<sub>15</sub>Si<sub>2</sub> [M+Na]<sup>+</sup> 1451.6755, found 1451.6751; A copy of the <sup>1</sup>H NMR spectrum of crude **44** is included below.

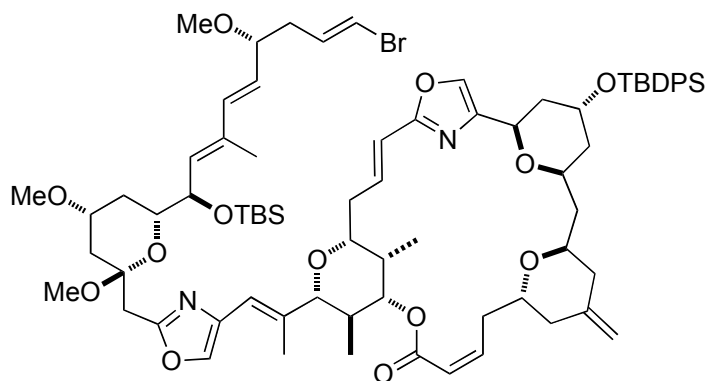

**Bisoxazole 27** (Obtained via simultaneous oxazole formation).

To a mixture of NaHCO<sub>3</sub> (60 mg, 0.7 mmol), Dess-Martin periodinane<sup>2</sup> (54 mg, 1.3 mmol) and *t*-BuOH (60 µL) in CH<sub>2</sub>Cl<sub>2</sub> (0.2 mL) was added a solution of crude bis-amido-diol **44** (5 mg) in CH<sub>2</sub>Cl<sub>2</sub> (0.1 mL). The mixture was stirred for 20 min before a saturated aqueous solution of Na<sub>2</sub>S<sub>2</sub>O<sub>3</sub> and NaHCO<sub>3</sub>, and diethyl ether, were added. The biphasic mixture was stirred vigorously for 5 min. The separated aqueous phase was extracted with diethyl ether. The combined organic phase was dried over Na<sub>2</sub>SO<sub>4</sub>, filtered, concentrated and further dried under high vacuum for 30 min to give a crude bisamido-dialdehyde. This was dissolved in CH<sub>2</sub>Cl<sub>2</sub> (4 mL) and to the solution were sequentially added Ph<sub>3</sub>P (37 mg, 0.14 mmol), *i*-Pr<sub>2</sub>NEt (200 µL) and (BrCCl<sub>2</sub>)<sub>2</sub> (46 mg, 0.14 mmol). The mixture was stirred at rt for 4 h before the volume of CH<sub>2</sub>Cl<sub>2</sub> was reduced to about 0.5 mL. CH<sub>3</sub>CN (1.5 mL) and DBU (40 µL) were added sequentially. The mixture was stirred for an additional 1 h before saturated aqueous NH<sub>4</sub>Cl and diethyl ether were added. The separated aqueous phase was extracted with additional diethyl ether. The combined organic phase was dried over Na<sub>2</sub>SO<sub>4</sub>, filtered, and concentrated. The residue was purified by flash chromatography (hexanes–ethyl acetate, 9:1 to 7:3) to give bisoxazole **27** (2.4 mg, 1.9 µmol, 45% from (2*Z*)-**47** as a white film. The analytical data of bisoxazole **27** thus prepared are identical to that obtained by sequential oxazole-formation process. A copy of <sup>1</sup>H NMR spectrum of compound **27** is included below.

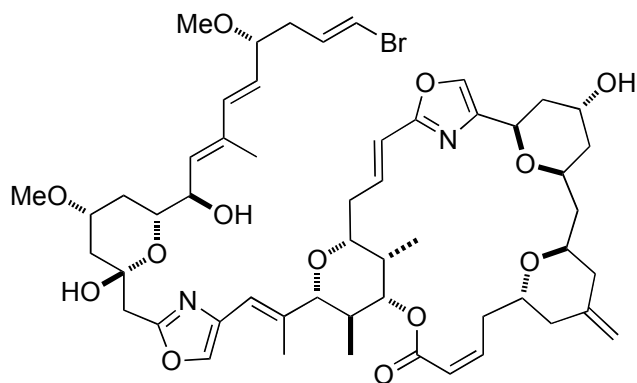

### Phorboxazole A (1)

To a solution of **27** (4.2 mg, 3.29  $\mu\text{mol}$ ) in ethyl acetate (0.1 mL) was added TBAF (0.5 mL, 1 M in THF). The solution was stirred for 20 h then washed with saturated aqueous  $\text{NH}_4\text{Cl}$ . The separated aqueous phase was extracted with ethyl acetate. The combined organic phase was dried over  $\text{Na}_2\text{SO}_4$ , filtered, concentrated, and purified by flash chromatography to give the 33-*O*-methyl-phorboxazole A (**28**, ca. 4 mg) as a colorless oil. This was dissolved in THF (1.7 mL) and aqueous HCl (0.72 M, 0.59 mL) was added. The mixture was stirred for 60 h, then neutralized by the addition of pH 7 aqueous phosphate buffer. The product was extracted with  $\text{CHCl}_3$ , dried over  $\text{Na}_2\text{SO}_4$ , filtered, and concentrated. The residue was purified by flash chromatography ( $\text{CHCl}_3$ –MeOH, 100:1 to 100:3 to 100:5) to give **1** (2.0 mg, 1.95  $\mu\text{mol}$ , 59 %) as an amorphous solid.  $R_f$  0.59 (HPTLC,  $\text{CHCl}_3$ –MeOH, 20:1), co-eluted with previously prepared phorboxazole A;<sup>4</sup> HRMS calc. for  $\text{C}_{53}\text{H}_{71}\text{BrN}_2\text{O}_{13}$   $[\text{M}+\text{Na}]^+$  1047.4017, found 1047.4013. Characterization data for **1** matched those previously reported.<sup>5</sup> A copy of  $^1\text{H}$  NMR spectrum of **1** thus prepared is included below.

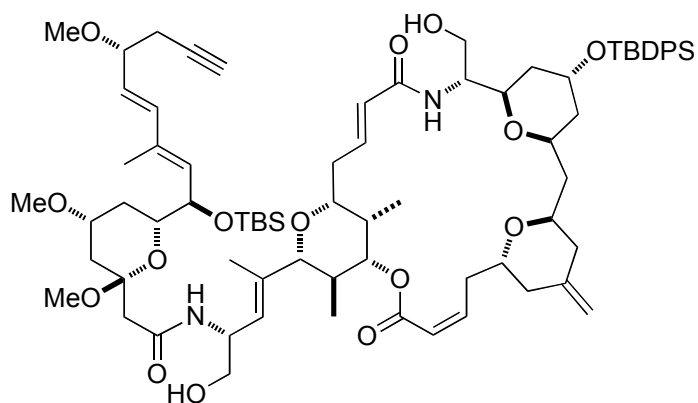

### 45,46-Dehydrobromo-bisamide 45.

To a stirred solution of (2*Z*)-**47** (60 mg, 49  $\mu\text{mol}$ ) in  $\text{CH}_2\text{Cl}_2$  (4 mL) under argon was added freshly distilled TFA (4 mL). The resulting solution was stirred for 50 min before the TFA and  $\text{CH}_2\text{Cl}_2$  were removed under a stream of nitrogen gas. The residue was further concentrated under high vacuum for 10 min and then stirred in a

<sup>5</sup> (a) Searle, P. A.; Molinski, T. F. *J. Am. Chem. Soc.* **1995**, *117*, 8126-8131. (b) Searle, P. A.; Molinski, T. F.; Brzeinski, L. J.; Leahy, J. W. *J. Am. Chem. Soc.* **1996**, *118*, 9422-9423. (c) Molinski, T. F. *Tetrahedron Lett.* **1996**, *37*, 7879-7980

mixture of aqueous pH 5.7 phosphate buffer and  $\text{CHCl}_3$  for 50 min. The separated aqueous phase was extracted with  $\text{CHCl}_3$  and the combined organic phase was dried over  $\text{Na}_2\text{SO}_4$ , filtered, concentrated, and further dried under high vacuum for 1 h to give a pale yellow solid (**46**). This solid was dissolved in DMF (50 mL) and *i*- $\text{Pr}_2\text{NEt}$  (0.5 mL) with the aid of sonication. A solution of pentafluorophenyl diphenylphosphinate (47 mg, 0.12 mmol) in DMF (1 mL) was added over 1 h. After stirring for an additional 4 h, complete formation of macrolactam **49** was indicated by ESI-MS analysis. In a separate vial, the C31-C46 carboxylic acid **31**<sup>1</sup> (24 mg, 49  $\mu\text{mol}$ ) was dissolved in DMF (2 mL) and *i*- $\text{Pr}_2\text{NEt}$  (0.1 mL) at rt. PyAOP (26 mg, 49  $\mu\text{mol}$ ) was added. The mixture was gently shaken for 1 min before being added to the solution of **49**. The resultant mixture was stirred for 20 min and then concentrated by rotary evaporation under high vacuum. The residue was purified by flash chromatography ( $\text{CHCl}_3$ –MeOH, 1:0 to 100:1 to 50:1 to 30:1) to give **45** (40 mg, 29  $\mu\text{mol}$ , 60 %) as an amorphous solid:  $R_f$  0.34 ( $\text{CHCl}_3$ –MeOH, 12:1);  $[\alpha]_D^{23}$  +10.9 (*c* 1.41,  $\text{CHCl}_3$ ); IR 3310, 3070, 2958, 2856, 1700, 1650, 1507, 1462, 1430, 1259 1102, 1027  $\text{cm}^{-1}$ ;  $^1\text{H}$  NMR (500 MHz)  $\delta$  7.62 (m, 4H), 7.43 (t,  $J$  = 7.5 Hz, 2H), 7.37 (t,  $J$  = 7.5 Hz, 4H), 6.87 (d,  $J$  = 7.5 Hz, 1H), 6.62 (ddd,  $J$  = 15.5, 7.5, 5.0 Hz, 1H), 6.27 (d,  $J$  = 15.5 Hz, 1H), 6.20 (d,  $J$  = 8.5 Hz, 1H), 6.10 (dt,  $J$  = 11.5, 8.0 Hz, 1H), 5.89 (d,  $J$  = 16.0 Hz, 1H), 5.87 (d,  $J$  = 11.5 Hz, 1H), 5.61 (dd,  $J$  = 16.0, 7.5 Hz, 1H), 5.42 (d,  $J$  = 9.0 Hz, 1H), 5.37 (d,  $J$  = 8.5 Hz, 1H), 4.75 (m, 1H), 4.72 (m, 2 H), 4.53 (dd,  $J$  = 11.0, 4.0 Hz, 1H), 4.50 (dd,  $J$  = 9.0, 7.0 Hz, 1H), 4.26 (m, 1H), 4.24 (s, 1H), 4.08 (m, 2H), 3.93 (m, 1H), 3.90 (m, 1H), 3.86 (ddd,  $J$  = 15.5, 7.5, 5.0 Hz, 1H), 3.80 (ddd,  $J$  = 13.0, 6.0, 6.0 Hz, 1H), 3.74-3.50 (m, 6H), 3.45 (d,  $J$  = 10.0 Hz, 1H), 3.32 (s, 3H), 3.29 (s, 3H), 3.22 (t,  $J$  = 5.5 Hz, 1H), 3.19 (s, 3H), 2.96 (m, 1H), 2.75 (d,  $J$  = 15.0 Hz, 1H), 2.53-2.37 (m, 7H), 2.29 (dd,  $J$  = 13.0, 3.5 Hz, 1H), 2.21 (dd,  $J$  = 13.0, 4.5 Hz, 1H), 2.05-2.00 (m, 3H), 1.97 (dd,  $J$  = 11.0, 4.5 Hz, 1H), 1.94-1.90 (m, 2H), 1.80 (s, 3H), 1.77 (s, 3H), 1.77-1.75 (m, 1H), 1.62-1.59 (m, 1H), 1.43-1.35 (m, 4H), 1.25 (m, 2H), 1.11 (m, 1H), 1.08 (s, 9H), 0.88 (d,  $J$  = 7.0 Hz, 3H), 0.87 (s, 9H), 0.72 (d,  $J$  = 6.5 Hz, 3H), 0.06 (s, 3H), 0.01 (s, 3H);  $^{13}\text{C}$  NMR (75 MHz)  $\delta$  168.8, 166.3, 165.9, 143.6, 141.4, 138.3, 137.3, 137.0, 135.5, 134.1, 133.9, 133.5, 132.1, 129.7, 129.6, 127.5, 126.6, 125.9, 122.2, 109.9, 108.1, 106.5, 104.2, 99.3, 89.0, 80.4, 80.0, 79.5, 75.7, 74.1, 73.5, 73.0, 71.8, 71.3, 70.9, 70.0, 65.5, 64.9, 64.6, 56.4, 55.3, 53.7, 48.9, 47.5, 43.6, 40.2, 39.0, 38.1, 37.8, 37.7, 35.3, 33.5, 32.9, 32.4, 32.1, 30.9, 29.5, 26.8, 25.6, 25.4, 19.1, 18.0, 13.2, 11.7, 6.0, 0.8, -4.7, -4.9; HRMS calc. for  $\text{C}_{76}\text{H}_{112}\text{N}_2\text{O}_{15}\text{Si}_2$   $[\text{M}+\text{Na}]^+$  1371.7499, found 1371.7505; Copies of the  $^1\text{H}$  NMR and  $^{13}\text{C}$  NMR spectra of compound **45** are included below.

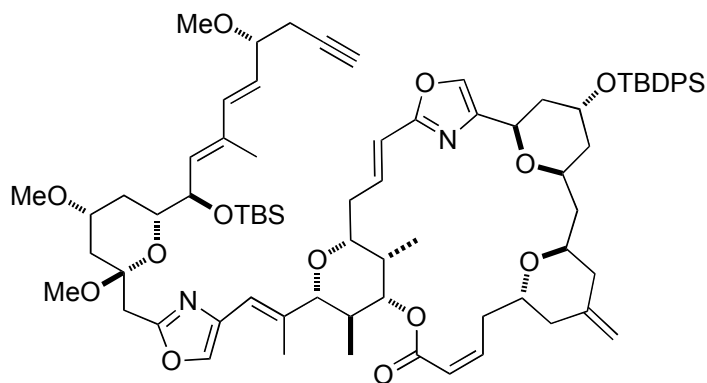

**45,46-dehydrobromo-bisoxazole 33** (Obtained via simultaneous oxazole formation).

To a stirred mixture of  $\text{NaHCO}_3$  (28 mg, 0.33 mmol), Dess-Martin periodinane<sup>2</sup> (25 mg, 60  $\mu\text{mol}$ ), *t*-BuOH (30  $\mu\text{L}$ ), and  $\text{CH}_2\text{Cl}_2$  (0.2 mL) was added a solution of bisamido-diol **45** (4.1 mg, 3.0  $\mu\text{mol}$ ) in  $\text{CH}_2\text{Cl}_2$  (0.1 mL). The resultant mixture was stirred for 25 min before saturated aqueous  $\text{Na}_2\text{S}_2\text{O}_3$  and  $\text{NaHCO}_3$ , and diethyl ether were added. The biphasic mixture was stirred vigorously for 5 min. The separated aqueous phase was extracted with diethyl ether. The combined organic phase was dried over  $\text{Na}_2\text{SO}_4$ , concentrated and dried further under high vacuum for 30 min to give crude the bisamido-dialdehyde. This was dissolved in  $\text{CH}_2\text{Cl}_2$  (3 mL).  $\text{Ph}_3\text{P}$  (30 mg, 0.11 mmol), *i*-Pr<sub>2</sub>NEt (80  $\mu\text{L}$ ) and  $(\text{BrCCl}_2)_2$  (37 mg, 0.11 mmol) were added sequentially. The mixture was stirred for 4 h before the volume of  $\text{CH}_2\text{Cl}_2$  was reduced to about 0.5 mL.  $\text{CH}_3\text{CN}$  (1.5 mL) and DBU (30  $\mu\text{L}$ ) were added sequentially. The mixture was stirred for an additional 1 h before saturated aqueous  $\text{NH}_4\text{Cl}$  and diethyl ether were added. The separated aqueous phase was extracted with diethyl ether. The combined organic phase was dried over  $\text{Na}_2\text{SO}_4$ , filtered, and concentrated. The residue was purified by flash chromatography (hexanes–ethyl acetate, 9:1 to 7:3) to give bisoxazole **33** (3.1 mg, 2.4  $\mu\text{mol}$ , 79%) as white film. The analytical data of bisoxazole **33** thus prepared are identical to those obtained by the sequential oxazole-formation process. Copies of the  $^1\text{H}$  NMR and  $^{13}\text{C}$  NMR spectra of compound **33** are included below.

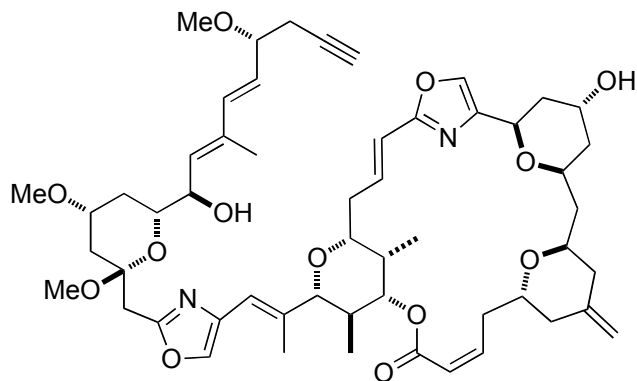

### 33-*O*-Methyl-45,46-dehydrobromo-phorboxazole A (**34**).

To a solution of oxazole **33** (1.75 mg, 1.3  $\mu$ mol) in ethyl acetate (1.4 mL) was added TBAF (1.0 M in THF, 0.55 mL, 0.55  $\mu$ mol). The mixture was stirred for 5 d, then washed with saturated aqueous  $\text{NH}_4\text{Cl}$  (3.0 mL). The aqueous phase was extracted with ethyl acetate ( $5 \times 5$  mL), and the combined organic phase was dried over  $\text{Na}_2\text{SO}_4$ , filtered, concentrated and purified by flash chromatography (ethyl acetate) to give **34** (1.1 mg, 1.1  $\mu$ mol, 89%) as a white film:  $R_f$  0.45 (ethyl acetate);  $[\alpha]_D^{23} +12.0$  (c 1.0,  $\text{CHCl}_3$ ); IR 3444, 2930, 1645, 1456, 1378, 1188, 1156, 1089, 1040  $\text{cm}^{-1}$ ;  $^1\text{H}$  NMR (500 MHz)  $\delta$  7.57 (s, 1H), 7.42 (s, 1H), 6.69 (ddd,  $J = 16.0, 9.5, 6.5$  Hz, 1H), 6.31 (dd,  $J = 16.0, 1.0$  Hz, 1H), 6.27 (app s, 2H), 5.92 (m, 2H), 5.64 (dd,  $J = 16.0, 8.0$  Hz, 1H), 5.49 (d,  $J = 9.0$  Hz, 1H), 4.99 (s, 1H), 4.74 (dd,  $J = 10.5, 3.0$  Hz, 1H), 4.62 (s, 1H), 4.52 (dd,  $J = 11.0, 4.0$  Hz, 1H), 4.40 (m, 1H), 4.39 (m, 2H), 4.17 (m, 1H), 4.07 (app t,  $J = 11.0$  Hz, 1H), 3.99 (m, 1H), 3.80 (ddd,  $J = 7.0, 6.5, 6.5$  Hz, 1H), 3.64-3.45 (m, 4H), 3.58 (d,  $J = 10.0$  Hz, 1H), 3.33 (s, 3H), 3.32 (s, 3H), 3.31 (s, 3H), 3.26 (d,  $J = 15.5$  Hz, 1H), 3.11 (d,  $J = 14.5$  Hz, 1H), 2.71 (d,  $J = 12.0$  Hz, 1H), 2.54 (dd,  $J = 5.0, 2.5$  Hz, 1H), 2.49 (dd,  $J = 6.0, 3.0$  Hz, 1H), 2.46 (dd,  $J = 6.0, 2.5$  Hz, 1H), 2.44 (dd,  $J = 6.5, 2.5$  Hz, 1H), 2.41 (m, 1H), 2.35 (m, 1H), 2.32 (m, 1H), 2.25 (dd,  $J = 13.0, 3.0$  Hz, 1H), 2.08-2.03 (m, 1H), 2.04 (s, 1H), 2.01 (t,  $J = 2.5$  Hz, 1H), 1.98 (s, 3H), 1.95-1.86 (m, 5H), 1.86 (s, 3H), 1.72 (app d,  $J = 14.0$  Hz, 1H), 1.60 (ddd,  $J = 14.0, 2.5, 2.5$  Hz, 1H), 1.47-1.37 (m, 2H), 1.13 (q,  $J = 12.0$  Hz, 1H), 0.97 (d,  $J = 7.0$  Hz, 3H), 0.78 (d,  $J = 6.0$  Hz, 3H);  $^{13}\text{C}$  NMR (125 MHz)  $\delta$  165.6, 161.3, 159.0, 144.4, 142.1, 141.7, 137.9, 137.3, 137.2, 136.3, 134.2, 133.7, 130.0, 128.3, 121.0, 119.3, 110.1, 100.0, 89.2, 80.5, 80.2, 79.4, 78.0, 76.8, 73.5, 73.1, 72.9, 71.1, 70.0, 69.2, 68.6, 66.9, 64.4, 56.6, 55.7, 48.2, 41.3, 39.1, 39.0, 39.0, 37.0, 35.6, 35.0, 34.4, 32.9, 32.6, 31.8, 30.5, 29.7, 25.8, 14.3, 13.5, 13.3, 6.0; HRMS calc. for  $\text{C}_{54}\text{H}_{72}\text{N}_2\text{O}_{13}$   $[\text{M}+\text{Na}]^+$  979.4932, found 979.4939. Copies of  $^1\text{H}$  NMR and  $^{13}\text{C}$  NMR spectra of compound **34** are included below.

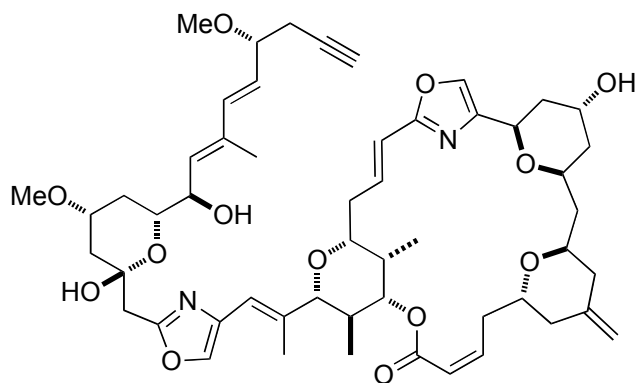

#### 45,46-Dehydrobromo-phorboxazole A (**35**).

To a solution of **34** (3.5 mg, 3.6  $\mu$ mol) in THF (4.4 mL) was added 6% aqueous HCl (0.9 mL). The mixture was stirred for 30 h, then washed with saturated aqueous NaHCO<sub>3</sub> (5 mL). The aqueous phase was extracted with ethyl acetate (5  $\times$  5 mL), and the combined organic phase was dried over Na<sub>2</sub>SO<sub>4</sub>, filtered, concentrated and purified by flash chromatography (ethyl acetate) to give **35** (2.3 mg, 2.4  $\mu$ mol, 68%) as a white film: *R<sub>f</sub>* 0.45 (ethyl acetate); [ $\alpha$ ]<sub>D</sub><sup>23</sup> +32.9 (c 0.85, CHCl<sub>3</sub>); IR 3567, 3331, 2924, 1773, 1718, 1684, 1654, 1647, 1636, 1577, 1570, 1559, 1542, 1534, 1508, 1498, 1490, 1458, 1434, 1376, 1260, 1188, 1090, 885, 812 cm<sup>-1</sup>; <sup>1</sup>H NMR (800 MHz, CHCl<sub>3</sub>)  $\delta$  7.58 (s, 1H), 7.43 (s, 1H), 6.69 (ddd, *J* = 16.0, 10.0, 7.0 Hz, 1H), 6.29 (m, 1H), 6.25 (s, 1H), 5.93 (m, 2H), 5.62 (dd, *J* = 16.0, 7.5 Hz, 1H), 5.37 (d, *J* = 9.6 Hz, 1H), 5.32 (s, 1H), 4.99 (s, 1H), 4.74 (d, *J* = 10.4 Hz, 1H), 4.63 (s, 1H), 4.52 (dd, *J* = 12.8, 4.8 Hz, 1H), 4.41 (app s, 1H), 4.32 (app t, *J* = 9.6 Hz, 1H), 4.17 (m, 1H), 4.07 (app t, *J* = 12.0 Hz, 1H), 4.00 (m, 1H), 3.79 (ddd, *J* = 12.3, 7.9, 2.0 Hz, 1H), 3.74 (dddd, *J* = 11.8, 11.8, 4.6, 4.6 Hz, 4H), 3.58 (d, *J* = 10.0 Hz, 1H), 3.56 (dd, *J* = 12.0, 4.8 Hz, 1H), 3.48 (s, 1H), 3.37 (s, 3H), 3.32 (s, 3H), 3.15 (d, *J* = 15.2 Hz, 1H), 3.07 (d, *J* = 15.2 Hz, 1H), 2.71 (bd, *J* = 12.5 Hz, 1H), 2.51 (m, 2H), 2.45 (m, 2H), 2.34 (m, 4H), 2.04 (bd, *J* = 13.0 Hz, 1H), 2.01 (m, 1H), 1.98 (s, 3H), 1.97 (m, 1H), 1.90 (m, 1H), 1.83 (s, 3H), 1.73 (d, *J* = 12.0 Hz, 1H), 1.6-1.5 (m, 1H), 1.45 (ddd, *J* = 13.2, 10.2, 3.1 Hz, 1H), 1.37 (ddd, *J* = 11.8, 11.8, 1.6 Hz, 1H), 1.11 (q, *J* = 12.0 Hz, 1H), 0.97 (d, *J* = 7.0 Hz, 3H), 0.77 (d, *J* = 6.5 Hz, 3H); <sup>13</sup>C NMR (75 MHz)  $\delta$  165.6, 161.2, 159.9, 144.3, 141.9, 141.6, 137.8, 137.5, 137.4, 137.2, 135.8, 134.0, 133.6, 129.6, 128.6, 128.1, 120.9, 119.2, 118.4, 110.0, 96.5, 89.1, 80.4, 80.1, 79.2, 77.9, 77.1, 73.4, 72.9, 72.4, 70.8, 69.9, 69.0, 68.5, 66.8, 64.3, 56.5, 55.7, 41.1, 40.4, 39.6, 38.9, 36.8, 34.9, 34.3, 32.9, 32.4, 31.6, 30.4, 25.7, 14.1, 13.4, 13.2, 5.9; HRMS calc. for C<sub>54</sub>H<sub>72</sub>N<sub>2</sub>O<sub>13</sub> [M+Na]<sup>+</sup> 965.4771, found 965.4763; Copies of <sup>1</sup>H NMR and <sup>13</sup>C NMR spectra of **35** are included below.

Amide

### STANDARD PROTON PARAMETERS

exp3 s2pu1

| SAMPLE      |                         | DEC. & VT  |         |
|-------------|-------------------------|------------|---------|
| date        | Sep 24 97               | dfreq      | 499.870 |
| solvent     | CDCl3                   | dn         | H1      |
| file        | /data/cforac/~rc111300b | dpr        | 15      |
| ACQUISITION |                         | dof        | 0       |
| sfrq        | 499.871                 | dm         | mmmm    |
| tn          | H1                      | dimm       | C       |
| at          | 2.001                   | dref       | 200     |
| nd          | 40000                   | dres       | 1.0     |
| sw          | 9997.5                  | homo       | n       |
| td          | 6000                    | PROCESSING |         |
| bs          | 16                      | lb         | 0.10    |
| tpwr        | 58                      | wf11e      |         |
| pw          | 7.5                     | proc       | ft      |
| d1          | 1.500                   | fn         | 131072  |
| tof         | 1504.1                  | math       | f       |
| nt          | 32                      |            |         |
| ct          | 32                      | wert       | wft     |
| alock       | n                       | wexp       | wft     |
| gain        | n                       | wss        | wft     |
| FLAGS       |                         | wnt        |         |
| l1          | n                       |            |         |
| in          | n                       |            |         |
| in          | y                       |            |         |
| dp          | y                       |            |         |
| hs          | yn                      |            |         |
| DISPLAY     |                         |            |         |
| sp          | 168.1                   |            |         |
| vp          | 3794.6                  |            |         |
| vs          | 67                      |            |         |
| sc          | 0                       |            |         |
| wc          | 210                     |            |         |
| h2mm        | 17.78                   |            |         |
| is          | 315.26                  |            |         |
| rft1        | 4614.4                  |            |         |
| rftp        | 3619.1                  |            |         |
| th          | 7                       |            |         |
| ins         | 1.200                   |            |         |
| ai          | cdc                     | ph         |         |

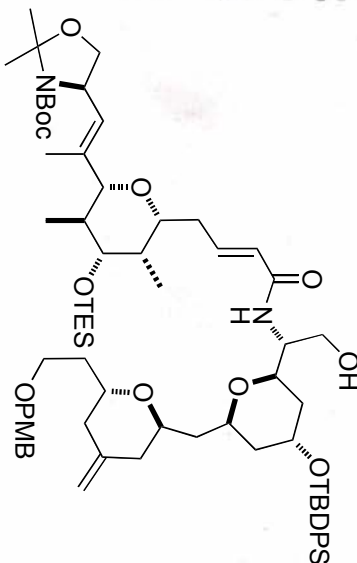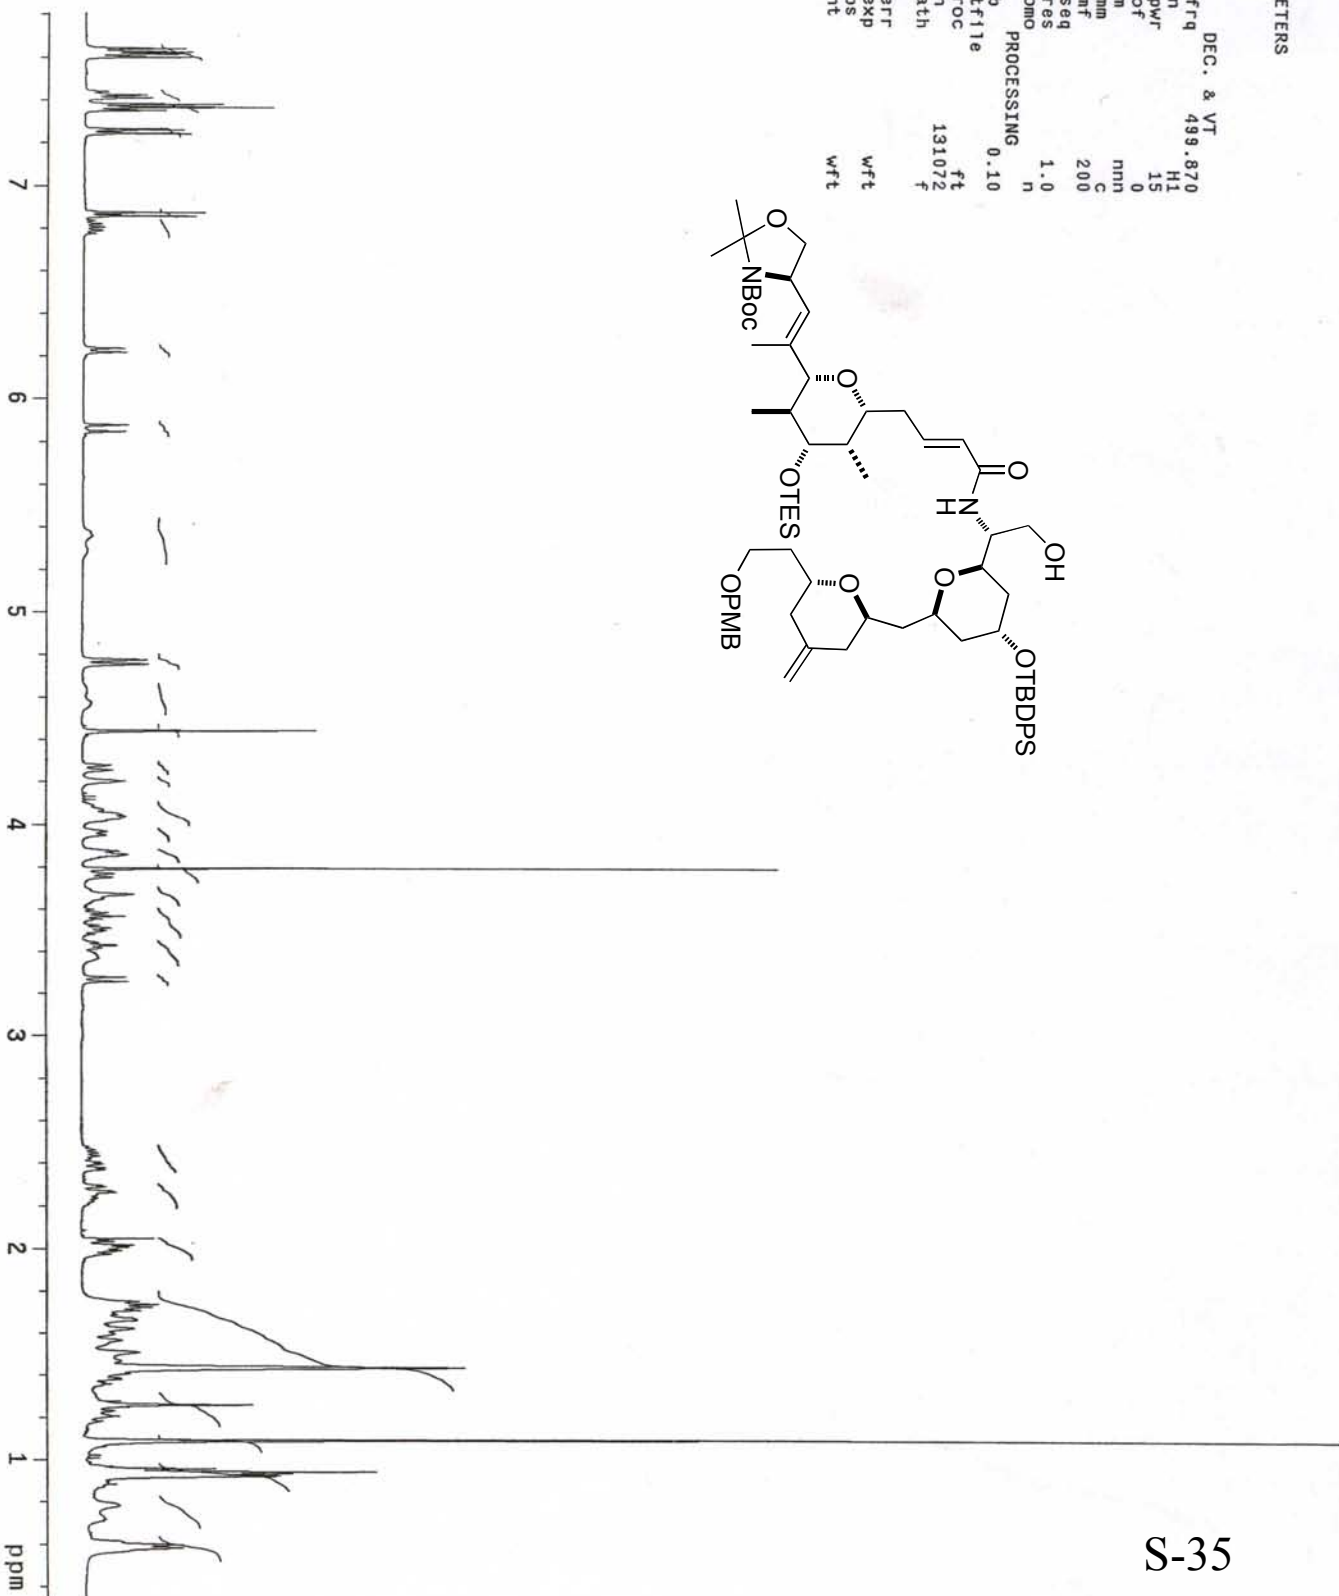

<sup>1</sup>H NMR spectrum for compound **8**

13C OBSERVE

expt std13c

SAMPLE Sep 24 97  
 date CDC13  
 solvent file /data/cfor/cdc/~  
 rci1300c  
 ACQUISITION  
 sfreq 75.485  
 tn C13  
 at 0.800  
 np 2.776  
 sw 17361.1  
 fb 10000  
 bs 16  
 tpwr 51  
 pw 10.1  
 d1 0.100  
 d2 1.900  
 tof 213.1  
 nt 576  
 ct weft  
 alock weft  
 gain wbs  
 not used  
 FLAGS  
 f1 n  
 in n  
 dp y  
 hs nm  
 DISPLAY  
 sp 229.9  
 wp 12771.2  
 vs 116  
 sc 0  
 wc 210  
 hzmm 60.82  
 ls 500.00  
 rfi 917.4  
 rfp 0  
 th 11  
 ins 1.000  
 nm  
 no ph  
 DEC. & VT  
 dfrq 300.170  
 dn H1  
 dpwr 36  
 dof -300.0  
 dm ny  
 dmm 5800  
 dseq 1.0  
 dres n  
 homo  
 PROCESSING  
 lb 1.00  
 wft  
 wft  
 wft

168.062  
 161.296  
 143.780  
 143.541  
 137.828  
 137.793  
 136.217  
 135.719  
 132.602  
 131.991  
 131.921  
 131.328  
 129.889  
 129.830  
 127.352  
 115.925  
 112.654

81.827  
 79.605  
 79.184  
 78.760  
 77.479  
 74.854  
 73.316  
 72.520  
 72.095  
 69.105  
 67.950  
 57.422  
 56.776  
 54.541  
 42.556  
 41.247  
 40.938  
 37.895  
 37.601  
 36.277  
 34.596  
 31.859  
 30.711  
 29.237  
 21.457

9.089  
 7.959  
 7.191  
 S-36

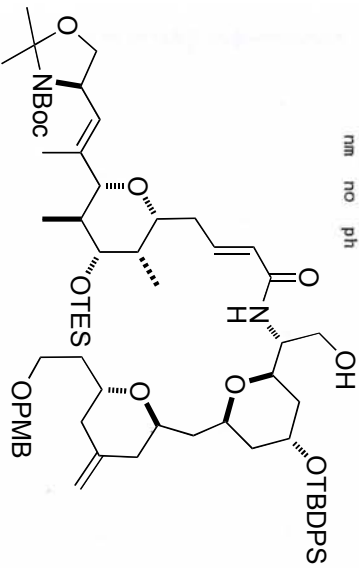

<sup>13</sup>C NMR spectrum for compound 8

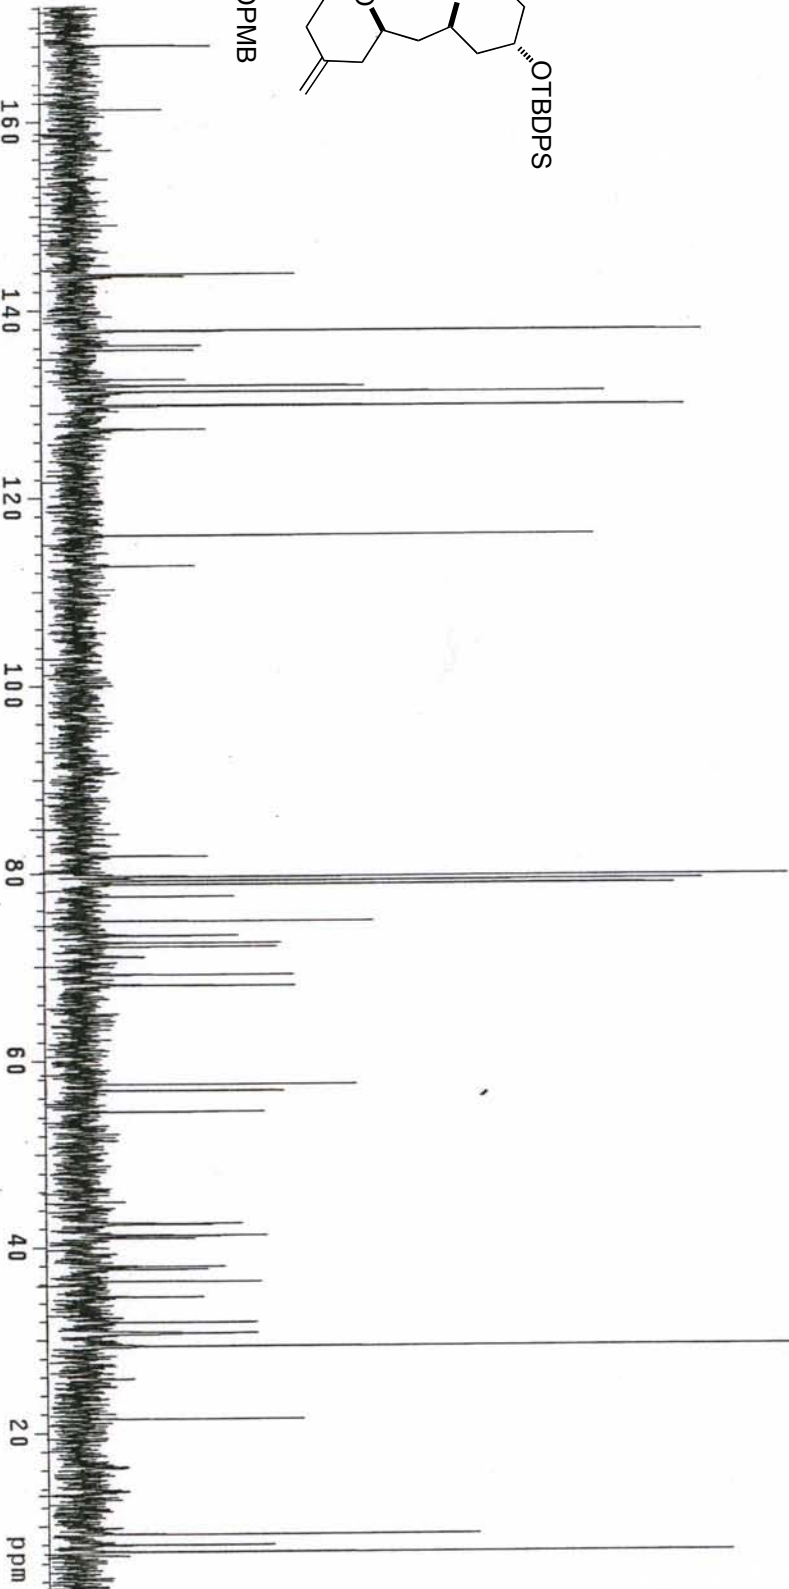

oxide

# STANDARD PROTON PARAMETERS

exp1 s2put1

| SAMPLE      |                | DEC. & VT  |         |
|-------------|----------------|------------|---------|
| date        | Nov 19 97      | dfrq       | 499.870 |
| solvent     | CDCl3          | dn         | H1      |
| file        | /export/home/~ | dpwr       | 15      |
| data        | /cforde/rciv30 | do         | 0       |
| ACQUISITION |                | dm         | nnn     |
| sfrq        | 499.871        | dmm        | c       |
| tn          | H1             | dmt        | 200     |
| at          | 2.001          | dseq       |         |
| np          | 40000          | dres       | 1.0     |
| sw          | 9997.5         | homo       | n       |
| fb          | 6000           | PROCESSING |         |
| bs          | 16             | lb         | 0.10    |
| tpwr        | 58             | wfite      |         |
| pw          | 7.1            | ft         |         |
| dl          | 1.500          | fn         | 131072  |
| tof         | 1504.1         | math       | f       |
| nt          | 32             | weff       | wft     |
| ct          | 32             | wexp       | wft     |
| alock       | n              | wbs        | wft     |
| gain        | not used       | wnt        |         |
| FLAGS       |                |            |         |
| il          | n              |            |         |
| in          | n              |            |         |
| dp          | y              |            |         |
| hs          | yn             |            |         |
| DISPLAY     |                |            |         |
| sp          | 159.2          |            |         |
| wp          | 3803.3         |            |         |
| vs          | 58             |            |         |
| sc          | 0              |            |         |
| wc          | 210            |            |         |
| hzmm        | 18.11          |            |         |
| is          | 33.57          |            |         |
| rfl         | 4614.4         |            |         |
| rfl         | 3619.1         |            |         |
| th          | 100.000        |            |         |
| ins         |                |            |         |
| al          | cdc            |            |         |
| ph          |                |            |         |

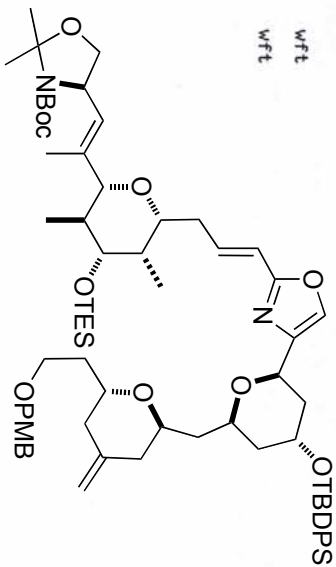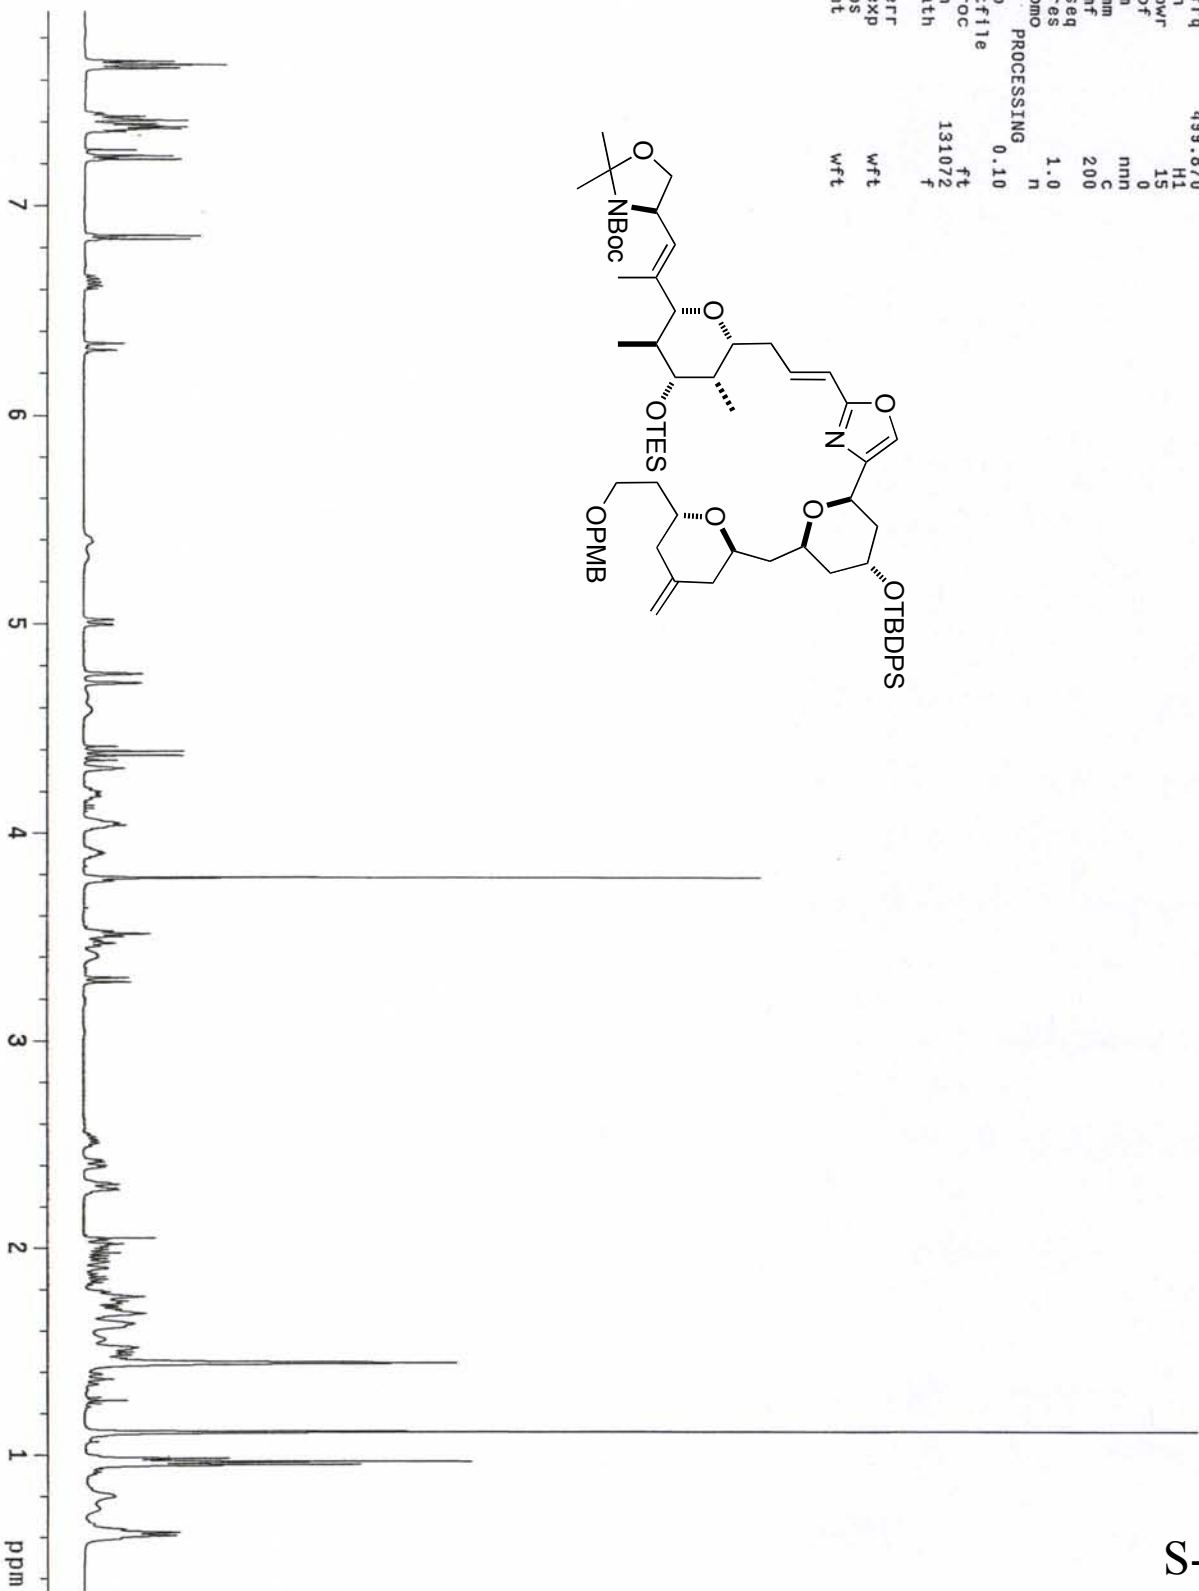

<sup>1</sup>H NMR spectrum for compound 10

13C OBSERVE

exptl std13c

SAMPLE

date Nov 14 97

solvent CDC13

file /remote/data/~

cfornac/ctiv28c

ACQUISITION

sfrq 75.485

in C13

at 0.800

np 27776

sw 17361.1

fb 10000

bs 18

lpwr 51

pw 10.1

d1 0.100

d2 1.900

tof 215.1

nt 512

ct 0

alock s

gain not used

FLAGS

il n

in n

dp y

hs nm

DISPLAY

sp 100.3

wp 12372.3

vs 134

sc 0

wc 210

hzm 58.92

is 500.00

rfl 6734.6

rflp 5812.4

th 10

ins 1.000

nm no ph

DEC. & VT  
300.170  
H1  
36  
-300.0  
nyy  
g  
5800  
1.0  
n  
PROCESSING  
1.00

160.954  
158.985  
142.855  
142.073  
135.987  
135.710  
135.643  
134.148  
133.983  
133.833  
130.604  
129.684  
129.639  
129.140  
127.621  
127.600  
118.387  
113.653  
110.165

79.608  
77.425  
77.298  
77.000  
76.579  
72.550  
69.307  
69.026  
68.749  
67.465  
66.738  
65.812

55.164  
54.592

40.059  
39.175  
39.027  
38.799  
38.368  
37.715  
36.406  
34.434  
34.100  
28.499  
27.029  
19.273

6.902  
5.786  
5.003

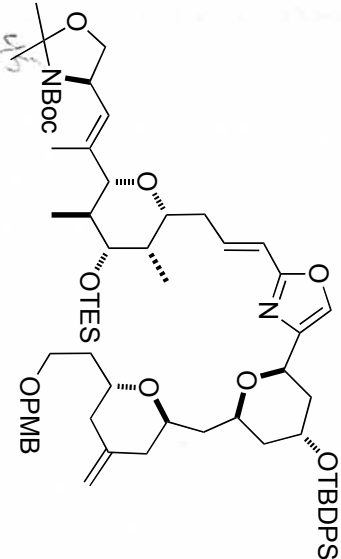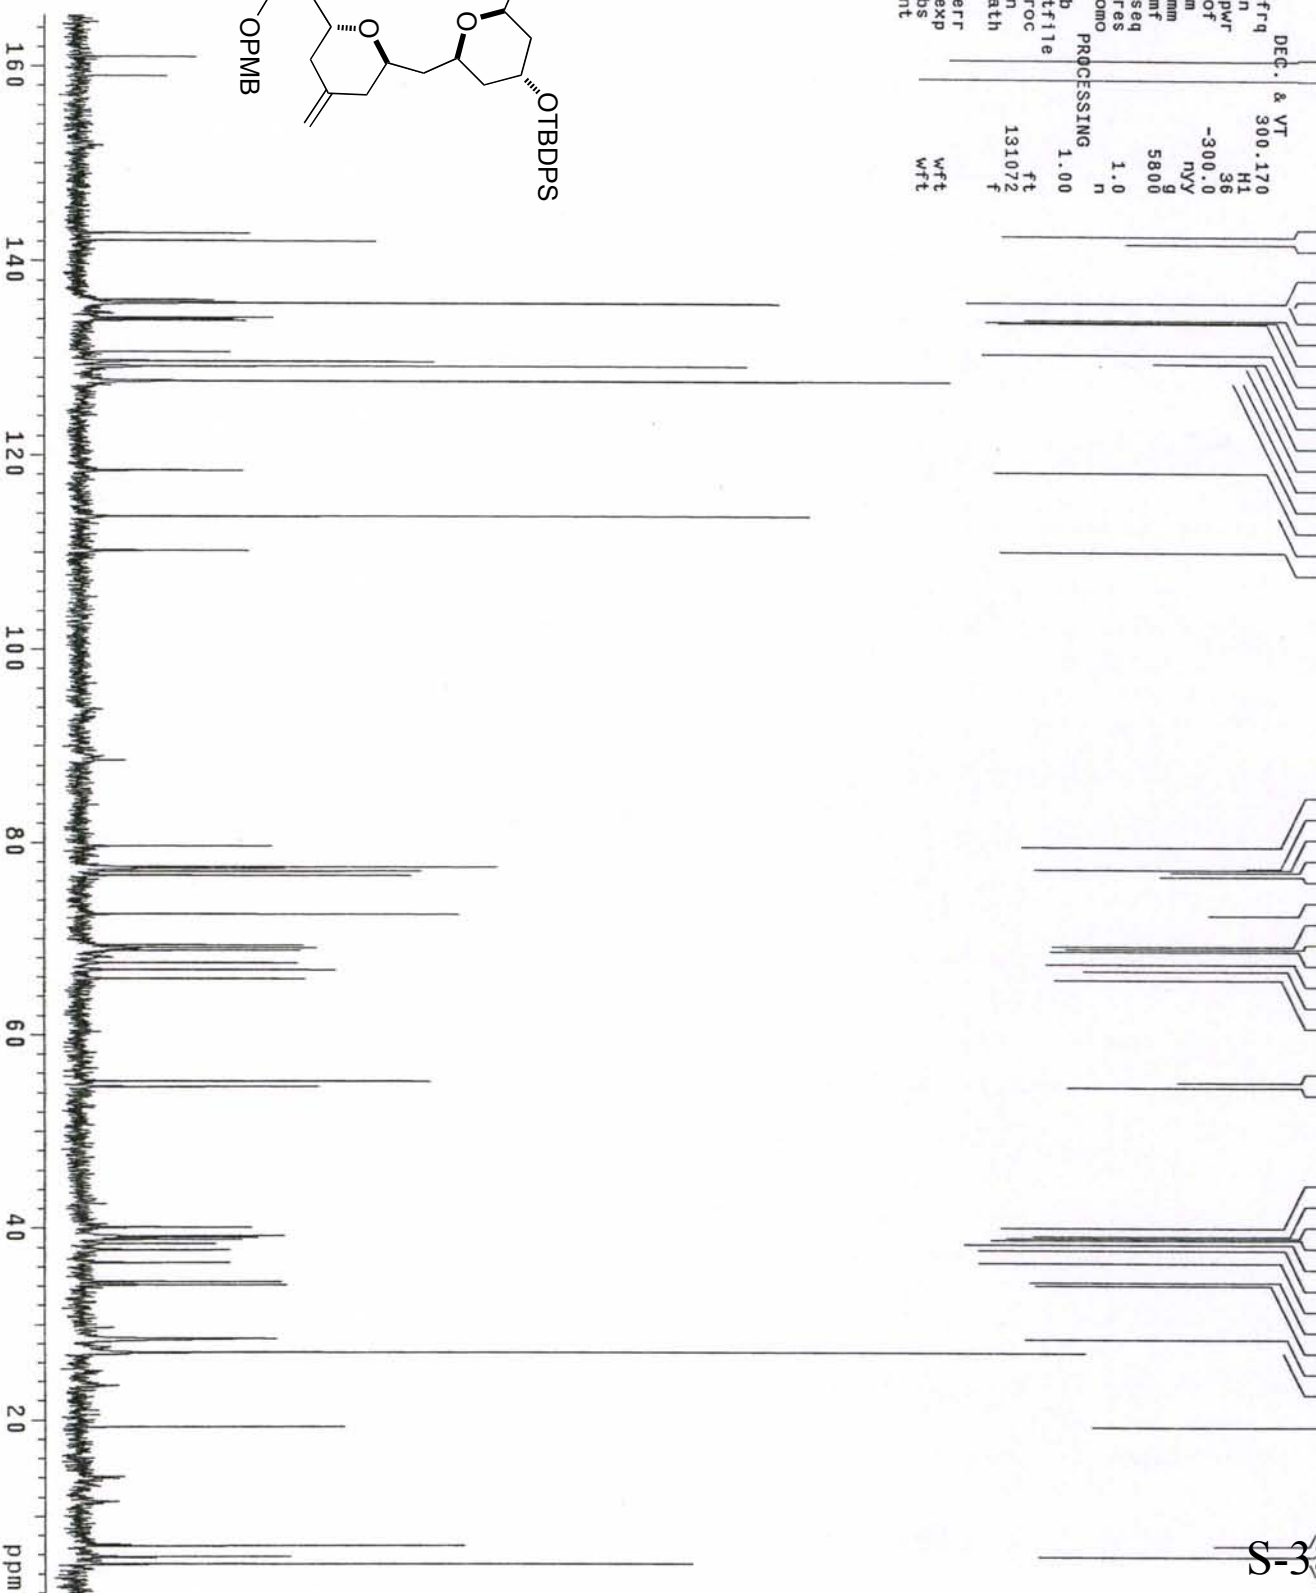

<sup>13</sup>C NMR spectrum for compound 10

## STANDARD PROTON PARAMETERS

exp3 szpu1

|                |                |           |            |           |         |
|----------------|----------------|-----------|------------|-----------|---------|
| date           | SAMPLE         | NOV 21 97 | dfreq      | DEC. & VT | 499.870 |
| solvent        |                | CDC13     | dn         |           | H1      |
| file           | /remote/data/~ |           | dpwr       |           | 15      |
| ctordc/rtiv32h |                |           | dof        |           | 0       |
| ACQUISITION    |                |           | dm         |           | nnn     |
| sfrq           |                | 499.871   | dmm        |           | C       |
| tn             |                | H1        | dseq       |           | 200     |
| at             |                | 2.001     | dres       |           | 1.0     |
| np             |                | 40000     | homo       |           | n       |
| sw             |                | 9997.5    | PROCESSING |           | 0.10    |
| fb             |                | 6000      | lb         |           | wf1e    |
| bs             |                | 16        | wtfile     |           | ft      |
| tpwr           |                | 58        | proc       |           | 131072  |
| pw             |                | 7.1       | fn         |           | f       |
| dl             |                | 1.500     | math       |           | wft     |
| tof            |                | 1504.1    |            |           | wft     |
| nt             |                | 32        |            |           | wft     |
| ct             |                | 0         |            |           | wft     |
| alock          |                | n         |            |           | wft     |
| gain           |                | n         |            |           | wft     |
| flags          | not used       |           |            |           |         |
| il             |                | n         |            |           |         |
| in             |                | y         |            |           |         |
| dp             |                | y         |            |           |         |
| hs             |                | yn        |            |           |         |
| sp             | DISPLAY        | 273.8     |            |           |         |
| wp             |                | 3703.7    |            |           |         |
| vs             |                | 66        |            |           |         |
| sc             |                | 0         |            |           |         |
| wc             |                | 210       |            |           |         |
| hzm            |                | 17.64     |            |           |         |
| is             |                | 33.57     |            |           |         |
| rfl            |                | 4614.4    |            |           |         |
| rfl            |                | 3619.1    |            |           |         |
| th             |                | 100.000   |            |           |         |
| ins            |                |           |            |           |         |
| ai             | cdc            | ph        |            |           |         |

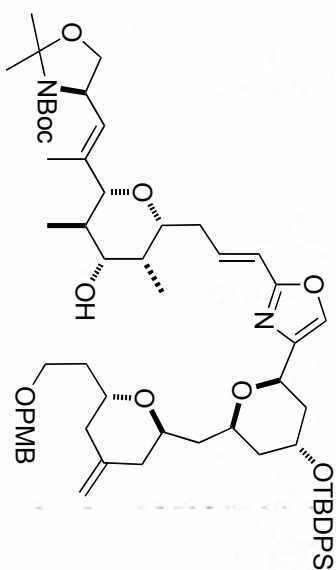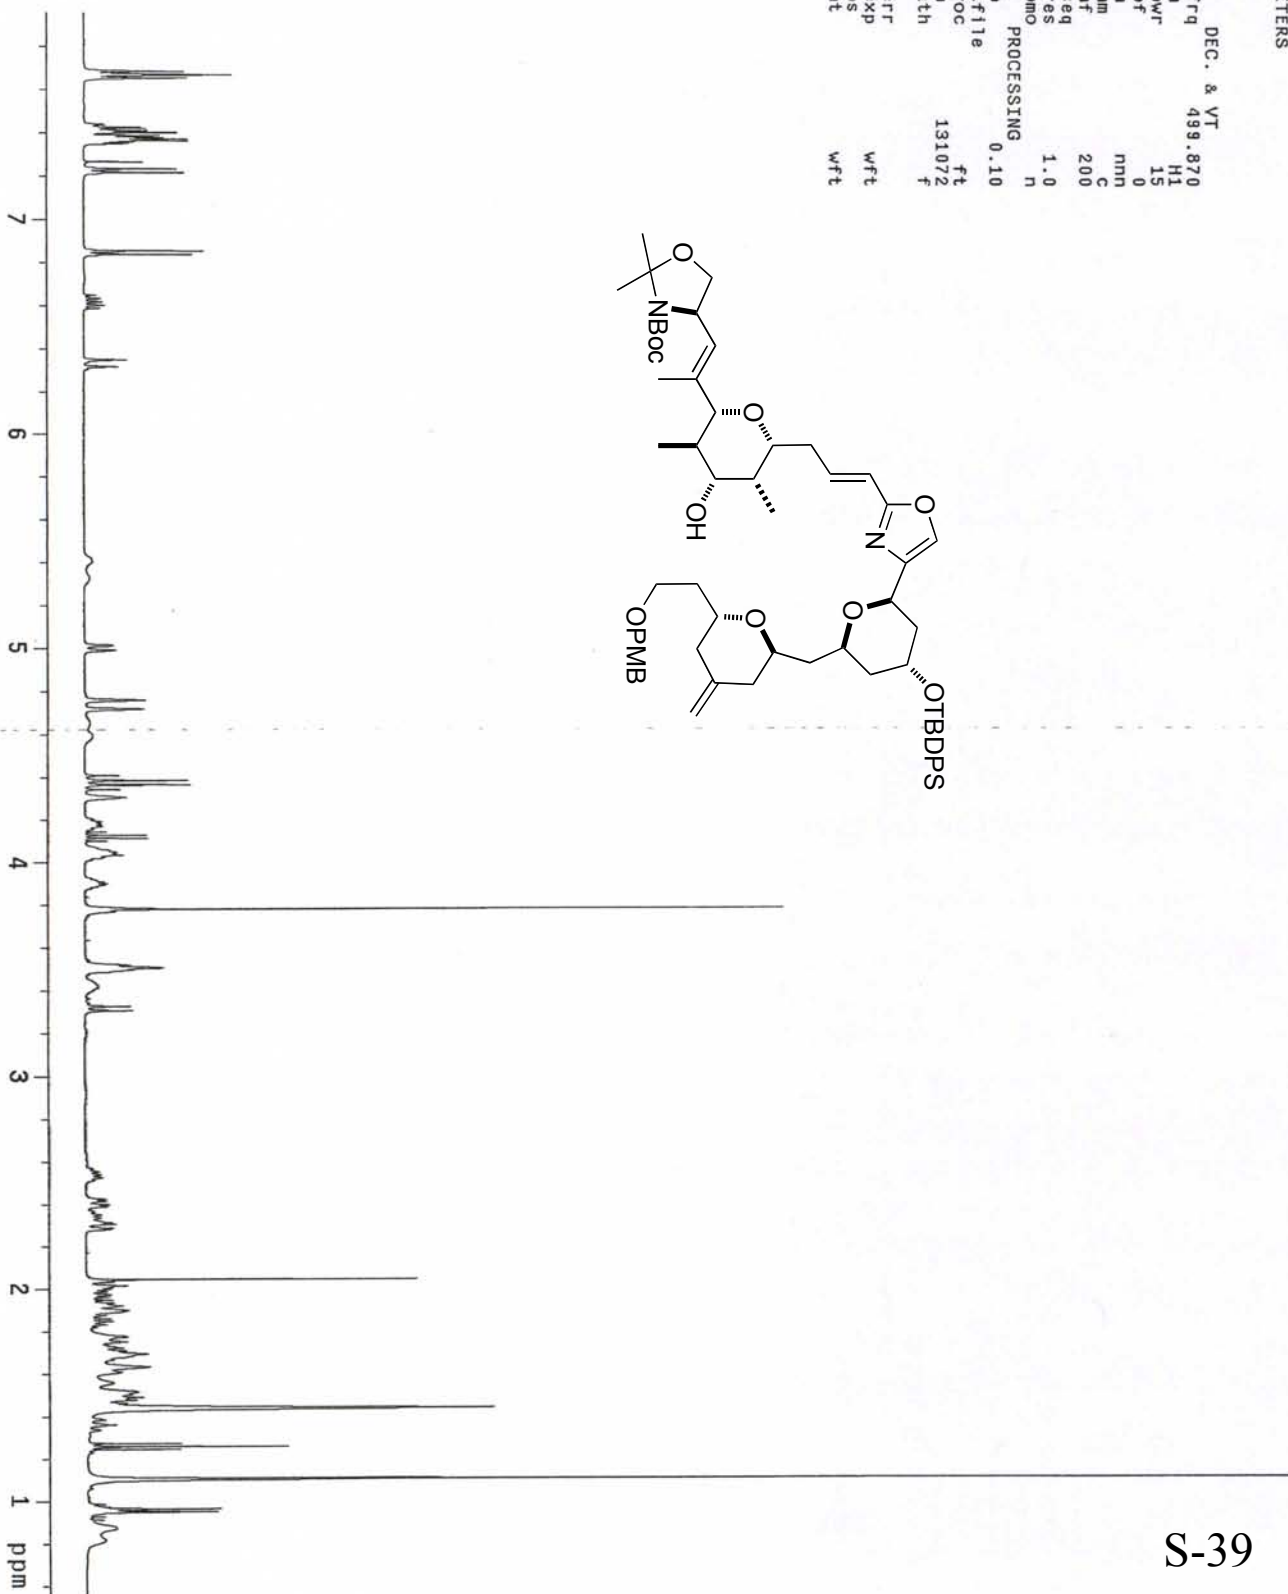<sup>1</sup>H NMR spectrum for compound **11**



12

# STANDARD PROTON PARAMETERS

exp3 szpu1

|                |                |            |         |
|----------------|----------------|------------|---------|
| SAMPLE         |                | DEC. & VT  |         |
| date           | Dec 4 97       | dfrq       | 499.870 |
| solvent        | CDCl3          | dn         | H1      |
| file           | /remote/data/~ | dpr        | 15      |
| ctordc/rciv47h |                | dof        | 0       |
| ACQUISITION    |                | dm         | nmn     |
| sfrq           | 499.871        | dmm        | C       |
| tn             | H1             | dmf        | 200     |
| at             | 2.001          | dseq       |         |
| np             | 40000          | dres       | 1.0     |
| sw             | 9997.5         | homo       | n       |
| fb             | 6000           | PROCESSING |         |
| bs             | 16             | lb         | 0.10    |
| tpwr           | 58             | wtfile     |         |
| pw             | 7.1            | proc       | ft      |
| dl             | 1.500          | fn         | 131072  |
| tof            | 1504.1         | math       | f       |
| nt             | 32             | werf       | wft     |
| ct             | 0              | wexp       | wft     |
| alock          | n              | wbs        | wft     |
| gain           | not used       | wnt        |         |
| fl             | n              |            |         |
| in             | y              |            |         |
| dp             | n              |            |         |
| hs             | ym             |            |         |

## DISPLAY

|     |        |
|-----|--------|
| sp  | 268.7  |
| wp  | 3662.8 |
| vs  | 89     |
| sc  | 0      |
| wc  | 210    |
| hzm | 17.44  |
| is  | 896.30 |
| rfl | 4614.4 |
| rtp | 3619.1 |
| th  | 7      |
| ins | 2.600  |
| ai  | cdc ph |

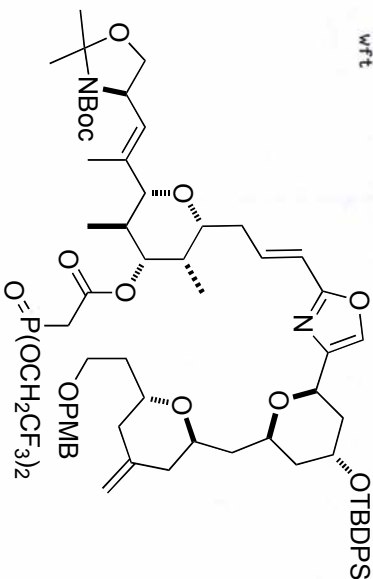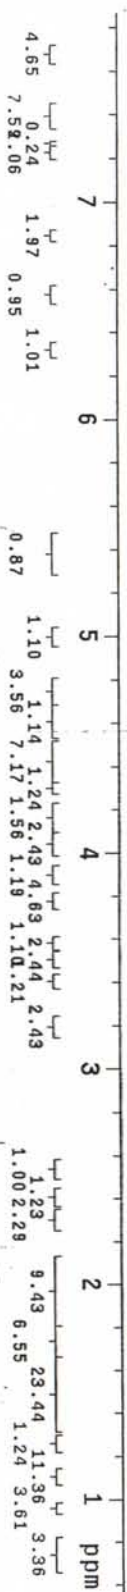

<sup>1</sup>H NMR spectrum for compound 12

13C OBSERVE

exptl stl13c

SAMPLE

date 5 97

solvent CDC13

file /remote/data/~

cford/rciv49c

ACQUISITION

sfreq 75.485

tn C13

at 0.800

np 2.776

sw 17361.1

fb 10000

bs 16

twrf 51

pw 10.1

d1 0.100

d2 1.900

tof 215.1

nt 640

ct 640

alock s

gain not used

fl n

in n

dp y

hs nm

DISPLAY

sp 198.6

wp 12372.3

vs 170

sc 0

wc 210

hzm 58.32

is 500.00

rfl 6736.2

rfd 5812.4

th 3

ins 1.000

163.870  
160.680  
158.953  
151.671  
142.897  
142.048  
135.675  
134.850  
134.187  
133.962  
133.790  
130.586  
129.646  
129.102  
127.582  
124.167  
124.059  
120.489  
120.381  
118.833  
113.618  
110.115  
102.749  
93.891  
93.049  
88.111  
81.039  
79.615  
77.425  
77.000  
76.667  
76.575  
72.504  
69.276  
68.988  
68.707  
67.872  
67.412  
66.696  
65.780  
63.250  
63.176  
62.744  
62.671  
62.239  
62.165  
61.730  
61.660  
60.260  
55.111  
54.508  
40.021  
38.992  
38.764  
38.326  
37.715  
35.900  
35.237  
34.935  
34.388  
33.033  
31.328  
29.590  
28.401  
27.457  
26.990  
25.018  
23.509  
20.929  
19.230  
14.096  
13.264  
12.534  
11.397

S-42

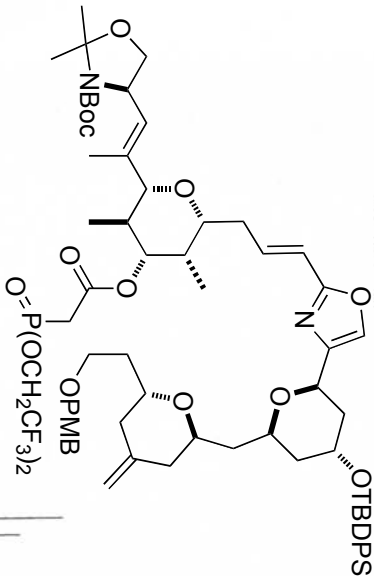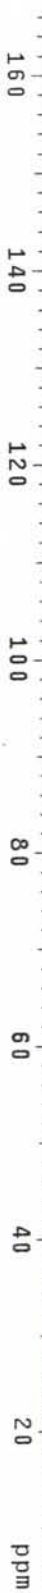

<sup>13</sup>C NMR spectrum for compound 12

Alcohol (2)

# STANDARD PROTON PARAMETERS

exp3 szpu1

| SAMPLE         |                | DEC. & VT  |         |
|----------------|----------------|------------|---------|
| date           | Dec            | 7 97       | 499.870 |
| solvent        | CDCl3          | dn         | H1      |
| file           | /remote/data/~ | dpwr       | 15      |
| ctordc/rciv50h |                | dof        | 0       |
| ACQUISITION    |                |            |         |
| sfrq           | 499.871        | dmm        | nmn     |
| tn             | H1             | dmm        | C       |
| at             | 2.001          | dsmf       | 200     |
| np             | 40000          | dres       | 1.0     |
| sw             | 9997.5         | homo       | n       |
| fb             | 6000           | PROCESSING |         |
| bs             | 16             | lb         | 0.10    |
| tpwr           | 58             | wtflie     |         |
| pw             | 7.1            | proc       | ft      |
| d1             | 1.500          | fn         | 131072  |
| tof            | 1504.1         | math       | f       |
| nt             | 32             | math       |         |
| ct             | 32             | warr       | wft     |
| atlock         | n              | wexp       | wft     |
| gain           | not used       | wbs        | wft     |
| fl             | n              | wnt        |         |
| in             | n              |            |         |
| dp             | y              |            |         |
| hs             | yn             |            |         |
| DISPLAY        |                |            |         |
| sp             | 254.3          |            |         |
| wp             | 3749.0         |            |         |
| vs             | 170            |            |         |
| sc             | 0              |            |         |
| wc             | 210            |            |         |
| h2mm           | 17.85          |            |         |
| is             | 397.17         |            |         |
| rfl            | 4614.4         |            |         |
| rtp            | 3619.1         |            |         |
| ins            | 7              |            |         |
| ai             | 1.400          |            |         |

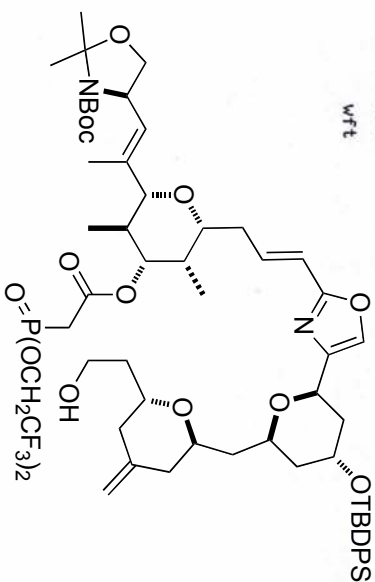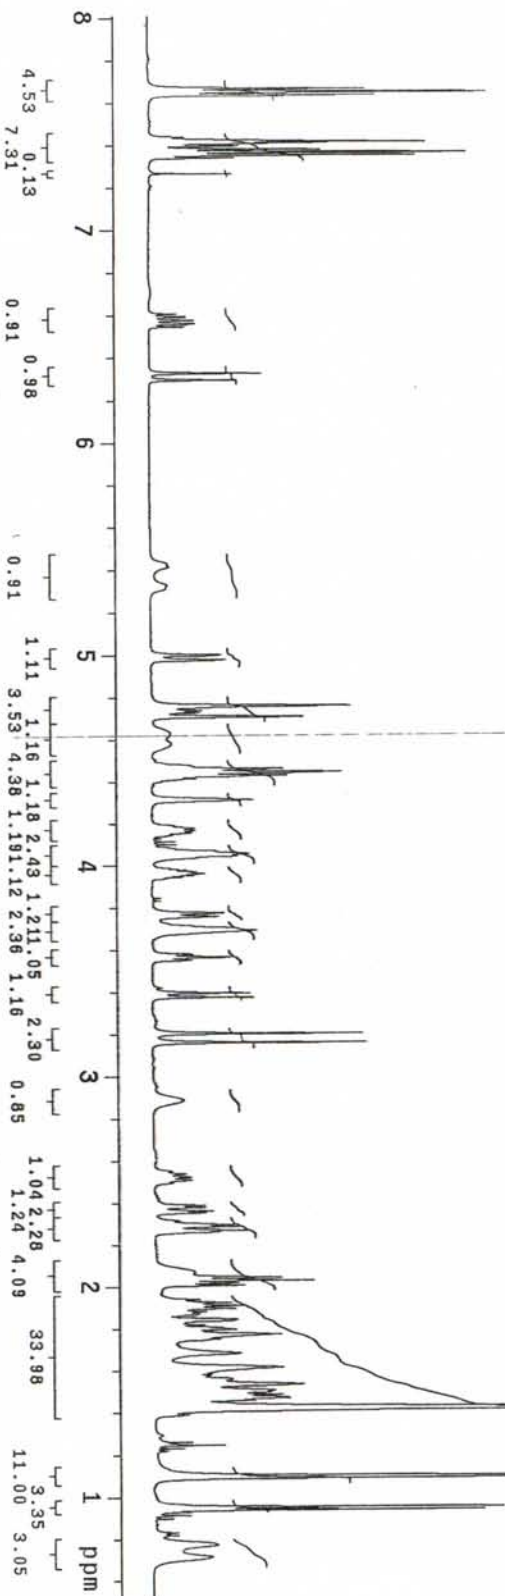

<sup>1</sup>H NMR spectrum for compound 12a

| exp1 | std13c |
|------|--------|
| 1    | 1      |
| 2    | 2      |
| 3    | 3      |
| 4    | 4      |
| 5    | 5      |
| 6    | 6      |
| 7    | 7      |
| 8    | 8      |
| 9    | 9      |
| 10   | 10     |
| 11   | 11     |
| 12   | 12     |
| 13   | 13     |
| 14   | 14     |
| 15   | 15     |
| 16   | 16     |
| 17   | 17     |
| 18   | 18     |
| 19   | 19     |
| 20   | 20     |
| 21   | 21     |
| 22   | 22     |
| 23   | 23     |
| 24   | 24     |
| 25   | 25     |
| 26   | 26     |
| 27   | 27     |
| 28   | 28     |
| 29   | 29     |
| 30   | 30     |
| 31   | 31     |
| 32   | 32     |
| 33   | 33     |
| 34   | 34     |
| 35   | 35     |
| 36   | 36     |
| 37   | 37     |
| 38   | 38     |
| 39   | 39     |
| 40   | 40     |
| 41   | 41     |
| 42   | 42     |
| 43   | 43     |
| 44   | 44     |
| 45   | 45     |
| 46   | 46     |
| 47   | 47     |
| 48   | 48     |
| 49   | 49     |
| 50   | 50     |
| 51   | 51     |
| 52   | 52     |
| 53   | 53     |
| 54   | 54     |
| 55   | 55     |
| 56   | 56     |
| 57   | 57     |
| 58   | 58     |
| 59   | 59     |
| 60   | 60     |
| 61   | 61     |
| 62   | 62     |
| 63   | 63     |
| 64   | 64     |
| 65   | 65     |
| 66   | 66     |
| 67   | 67     |
| 68   | 68     |
| 69   | 69     |
| 70   | 70     |
| 71   | 71     |
| 72   | 72     |
| 73   | 73     |
| 74   | 74     |
| 75   | 75     |
| 76   | 76     |
| 77   | 77     |
| 78   | 78     |
| 79   | 79     |
| 80   | 80     |
| 81   | 81     |
| 82   | 82     |
| 83   | 83     |
| 84   | 84     |
| 85   | 85     |
| 86   | 86     |
| 87   | 87     |
| 88   | 88     |
| 89   | 89     |
| 90   | 90     |
| 91   | 91     |
| 92   | 92     |
| 93   | 93     |
| 94   | 94     |
| 95   | 95     |
| 96   | 96     |
| 97   | 97     |
| 98   | 98     |
| 99   | 99     |
| 100  | 100    |

**SAMPLE**

DEC. &amp; VT 80

|               |                |      |         |
|---------------|----------------|------|---------|
| date          | Dec 7 97       | dfrq | 300.170 |
| solvent       | CDC13          | dn   | H1      |
| file          | /remote/data/~ | dpwr | 36      |
| record/record |                | df   | 800.0   |

|                |     |        |
|----------------|-----|--------|
| cfordc/rciv50c | dof | -300.0 |
| cfordc/rciv50c | dof | -300.0 |

| ACQUISITION |        | dm  | ny |
|-------------|--------|-----|----|
| sfrq        | 75.485 | dmm | g  |

|    |       |      |      |
|----|-------|------|------|
| tn | C13   | dmf  | 5800 |
| at | 0.800 | dseq |      |

|    |       |      |     |
|----|-------|------|-----|
| np | 27776 | dres | 1.0 |
| sw | 17351 | homo |     |

| fb | 10000 | PROCESSING | 1.00 |
|----|-------|------------|------|
| fb | 16    | 1h         | 1.00 |

|      |    |        |
|------|----|--------|
| ds   | 10 | 1.00   |
| tpwr | 51 | wtfile |

|    |       |      |        |
|----|-------|------|--------|
| pw | 10.1  | proc | tl     |
| d1 | 0.100 | fn   | 131072 |

|     |       |      |   |
|-----|-------|------|---|
| d2  | 1.900 | math | f |
| tof | 215.1 |      |   |

|    |     |      |     |
|----|-----|------|-----|
| nt | 896 | werr | wft |
| ct | 896 | wexd |     |

| lock   | s        | wbs | wft |
|--------|----------|-----|-----|
| a lock |          |     |     |
| gain   |          |     |     |
|        | not used | wft |     |

gain not used with  
FLAGS

二五

dp hs  
γ nm

DISPLAY  
SD -922.0

|    |         |
|----|---------|
| WP | 17361.1 |
| VS | 324     |

010 010

|      |        |
|------|--------|
| WC   | 2.10   |
| hZmm | 82.67  |
| z    | 700.00 |

|     |        |
|-----|--------|
| 15  | 500.00 |
| 141 | 6734.4 |

|     |        |
|-----|--------|
| rfp | 5812.4 |
| th  | 5      |

| ins | 1.000 |
|-----|-------|
| no  |       |
| ph  |       |

C1CCC(CC1)C(=O)OC

—

| Year | Very satisfied (%) |
|------|--------------------|
| 1993 | 65                 |
| 1994 | 75                 |
| 1995 | 65                 |
| 1996 | 75                 |
| 1997 | 65                 |
| 1998 | 75                 |
| 1999 | 65                 |
| 2000 | 75                 |
| 2001 | 65                 |

O=C1C=CC(=O)O1CC(=O)OCCOC(=O)N(C)C

— 011

$$\text{O}=\text{P}(\text{OCH}_2\text{CF}_3)_2$$

1000

1000

200

163.923  
160.859  
151.703  
142.582  
141.799  
135.654  
135.629  
135.142  
134.271  
134.064  
133.787  
129.666  
128.456  
127.596  
124.181  
124.073  
120.504  
120.395  
118.745  
110.273  
88.771  
88.164  
81.060  
79.650  
77.425  
77.000  
76.691  
76.575  
70.343  
69.890  
69.697  
68.777  
67.903  
67.180  
65.815  
63.278  
63.204  
62.773  
62.699  
62.267  
62.194  
61.765  
61.688  
60.828  
54.522  
39.957  
39.027  
38.599  
38.543  
37.346  
36.174  
35.900  
35.251  
34.963  
33.061  
31.331  
28.429  
27.474  
26.983  
25.046  
23.050  
19.262  
13.264  
12.566  
11.443  
5.951

S-44

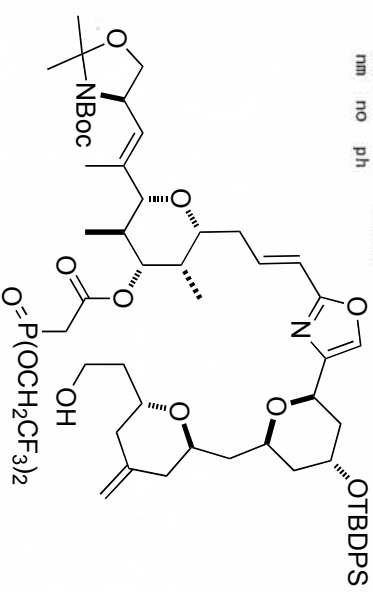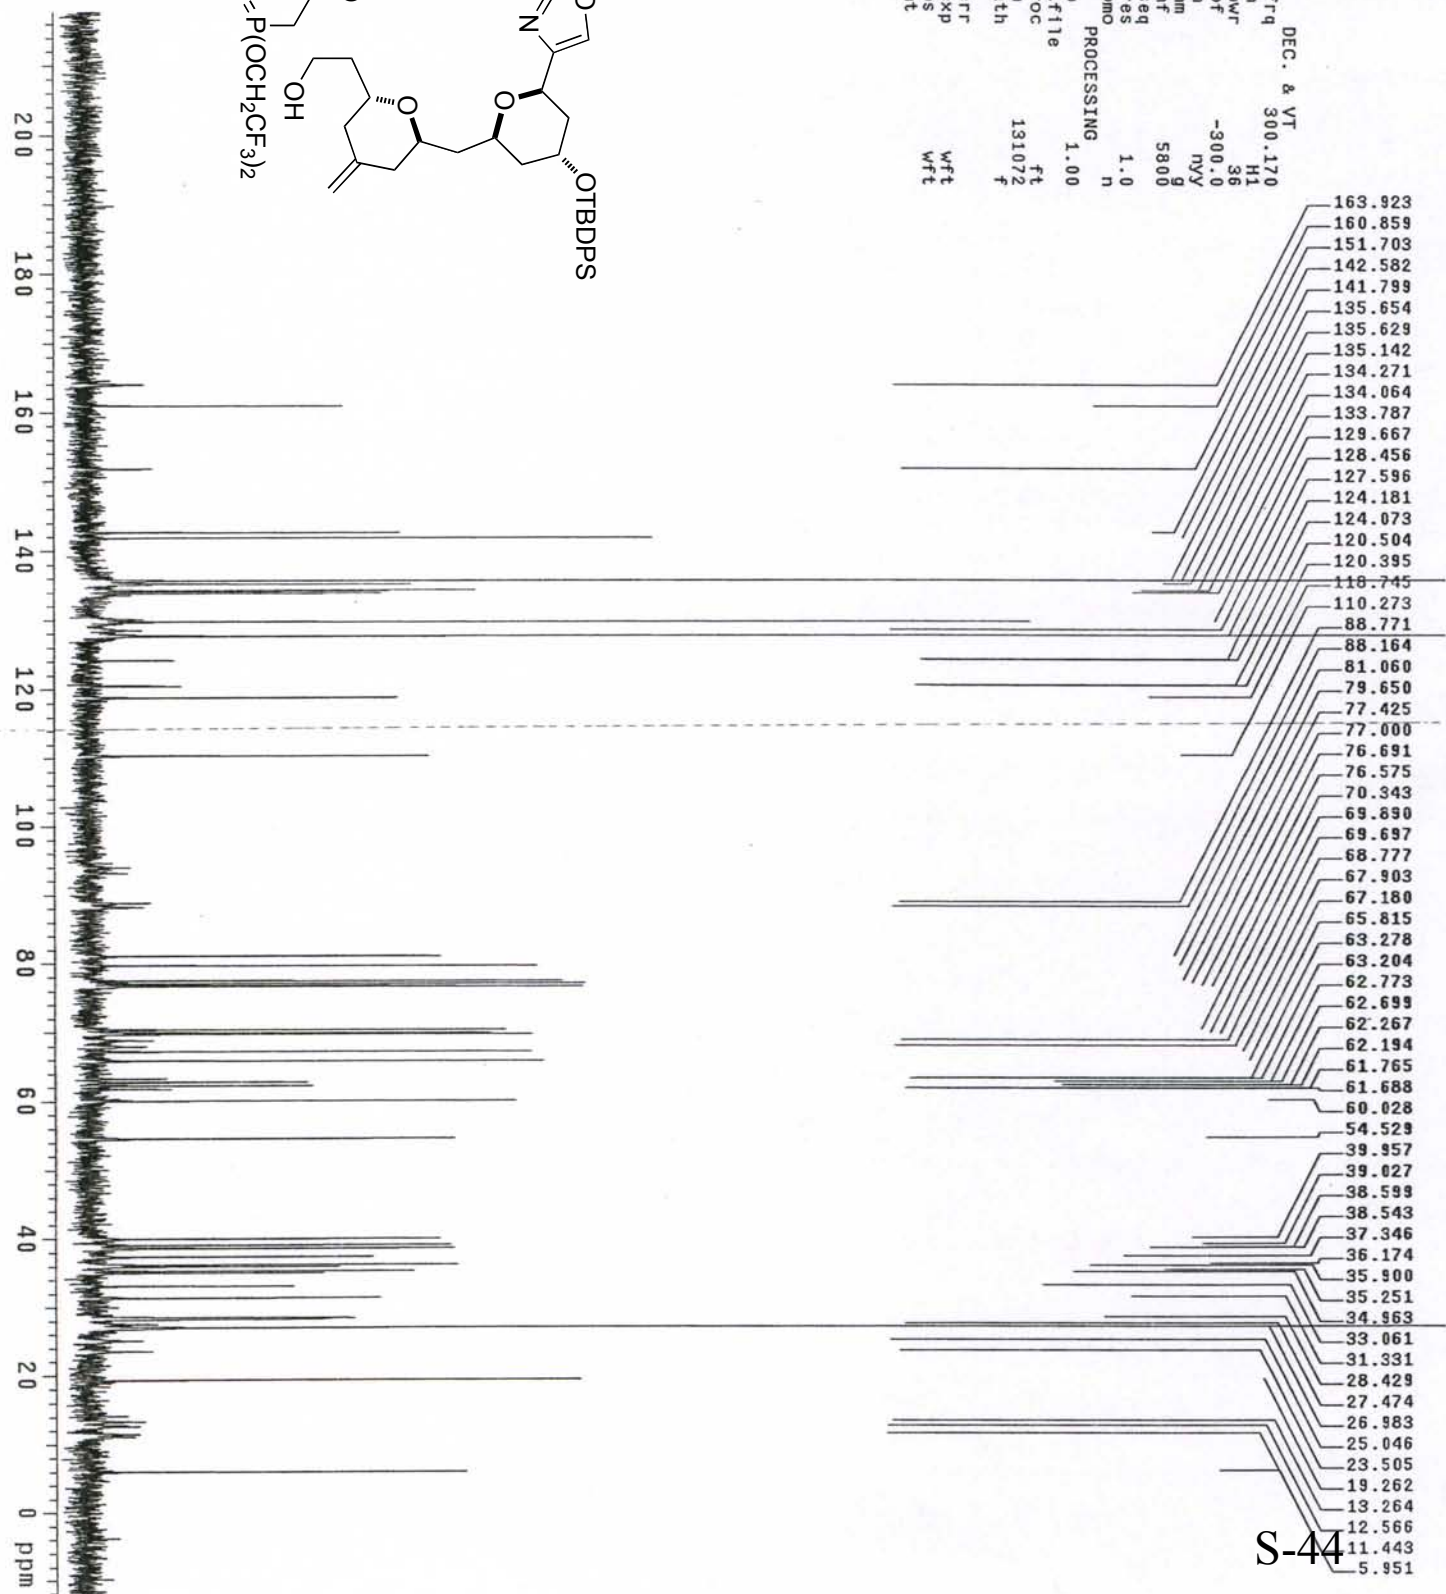

<sup>13</sup>C NMR spectrum for compound **12a**

ALL NO CARBON!

# STANDARD PROTON PARAMETERS

|                  |                |            |         |
|------------------|----------------|------------|---------|
| expt             |                | s2pu1      |         |
| SAMPLE           |                |            |         |
| date             | Dec 8 97       | DEC. & VT  | 489.870 |
| solvent          | CDC13          | dn         | H1      |
| file             | /export/home/~ | dpwr       | 15      |
| data/cforac/ctv1 | 51             | dof        | 0       |
| ACQUISITION      |                |            |         |
| sfrq             | 499.871        | dm         | nmh     |
| tn               | H1             | dmm        | c       |
| at               | 2.001          | dseq       | 200     |
| np               | 40000          | dres       | 1.0     |
| sw               | 9997.5         | homo       | n       |
| fb               | 6000           | PROCESSING |         |
| bs               | 16             | lb         | 0.10    |
| tpwr             | 58             | wtflle     |         |
| pw               | 7.1            | proc       | ft      |
| d1               | 1.500          | fn         | 131072  |
| tof              | 1504.1         | math       | f       |
| nt               | 32             | werf       | wft     |
| ct               | 32             | wexp       | wft     |
| alock            | n              | wbs        | wft     |
| gain             | not used       | wnt        |         |
| FLAGS            |                |            |         |
| l1               | n              |            |         |
| l2               | n              |            |         |
| dp               | y              |            |         |
| hs               | yn             |            |         |
| DISPLAY          |                |            |         |
| sp               | 227.1          |            |         |
| wp               | 4822.0         |            |         |
| vs               | 138            |            |         |
| sc               | 0              |            |         |
| wc               | 210            |            |         |
| hzm              | 22.96          |            |         |
| is               | 267.78         |            |         |
| rfl              | 4614.4         |            |         |
| rft              | 3619.1         |            |         |
| th               | 105.000        |            |         |
| at               | cdc            | ph         |         |

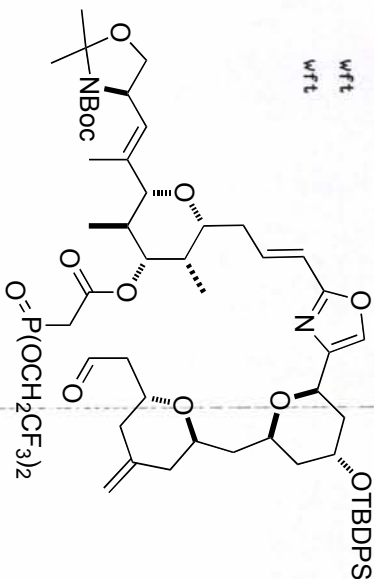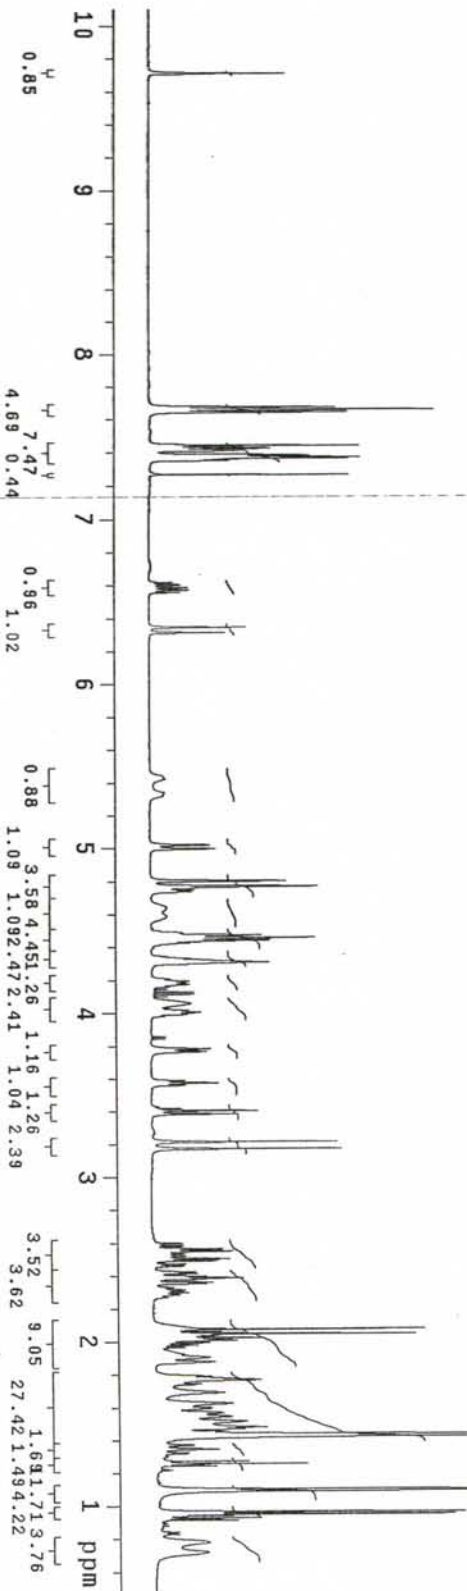

<sup>1</sup>H NMR spectrum for compound 5

Mac. Protected. Mixture?

STANDARD PROTON PARAMETERS

```

exp1 s2pu1
SAMPLE
date Dec 10 97 dfrq DEC. & VT 499.870
solvent CDCl3 dn H1
file /export/home/~ dpwr 15
data/cfoidc/rciv52~ dof 0
ACQUISITION _1h dm nnn
sfrq 499.871 dnm C
tn H1 dntf 200
at 2.001 dseq 1.0
np 40000 dres n
sw 9997.5 homo n
fb 6000 lb PROCESSING 0.10
bs 16 wffile ft
tpwr 58 proc f
pw 7.1 tn 131072
di 1.500 math f
tof 1504.1 wft
nt 32 werr wft
ct 32 wexp wft
alock n wnt
gain not used wnt
FLAGS
il n
in n
dp y
hs yn
DISPLAY
sp 257.8
wp 3613.2
vs 208
vc 0
wc 210
h2mm 17.21
is 337.77
rf1 4614.4
rfp 3619.1
th 100.000
ins
ai cdc ph
  
```

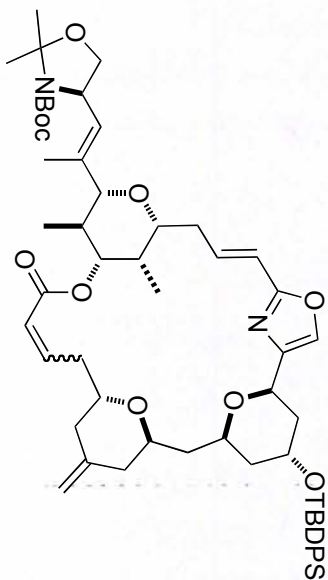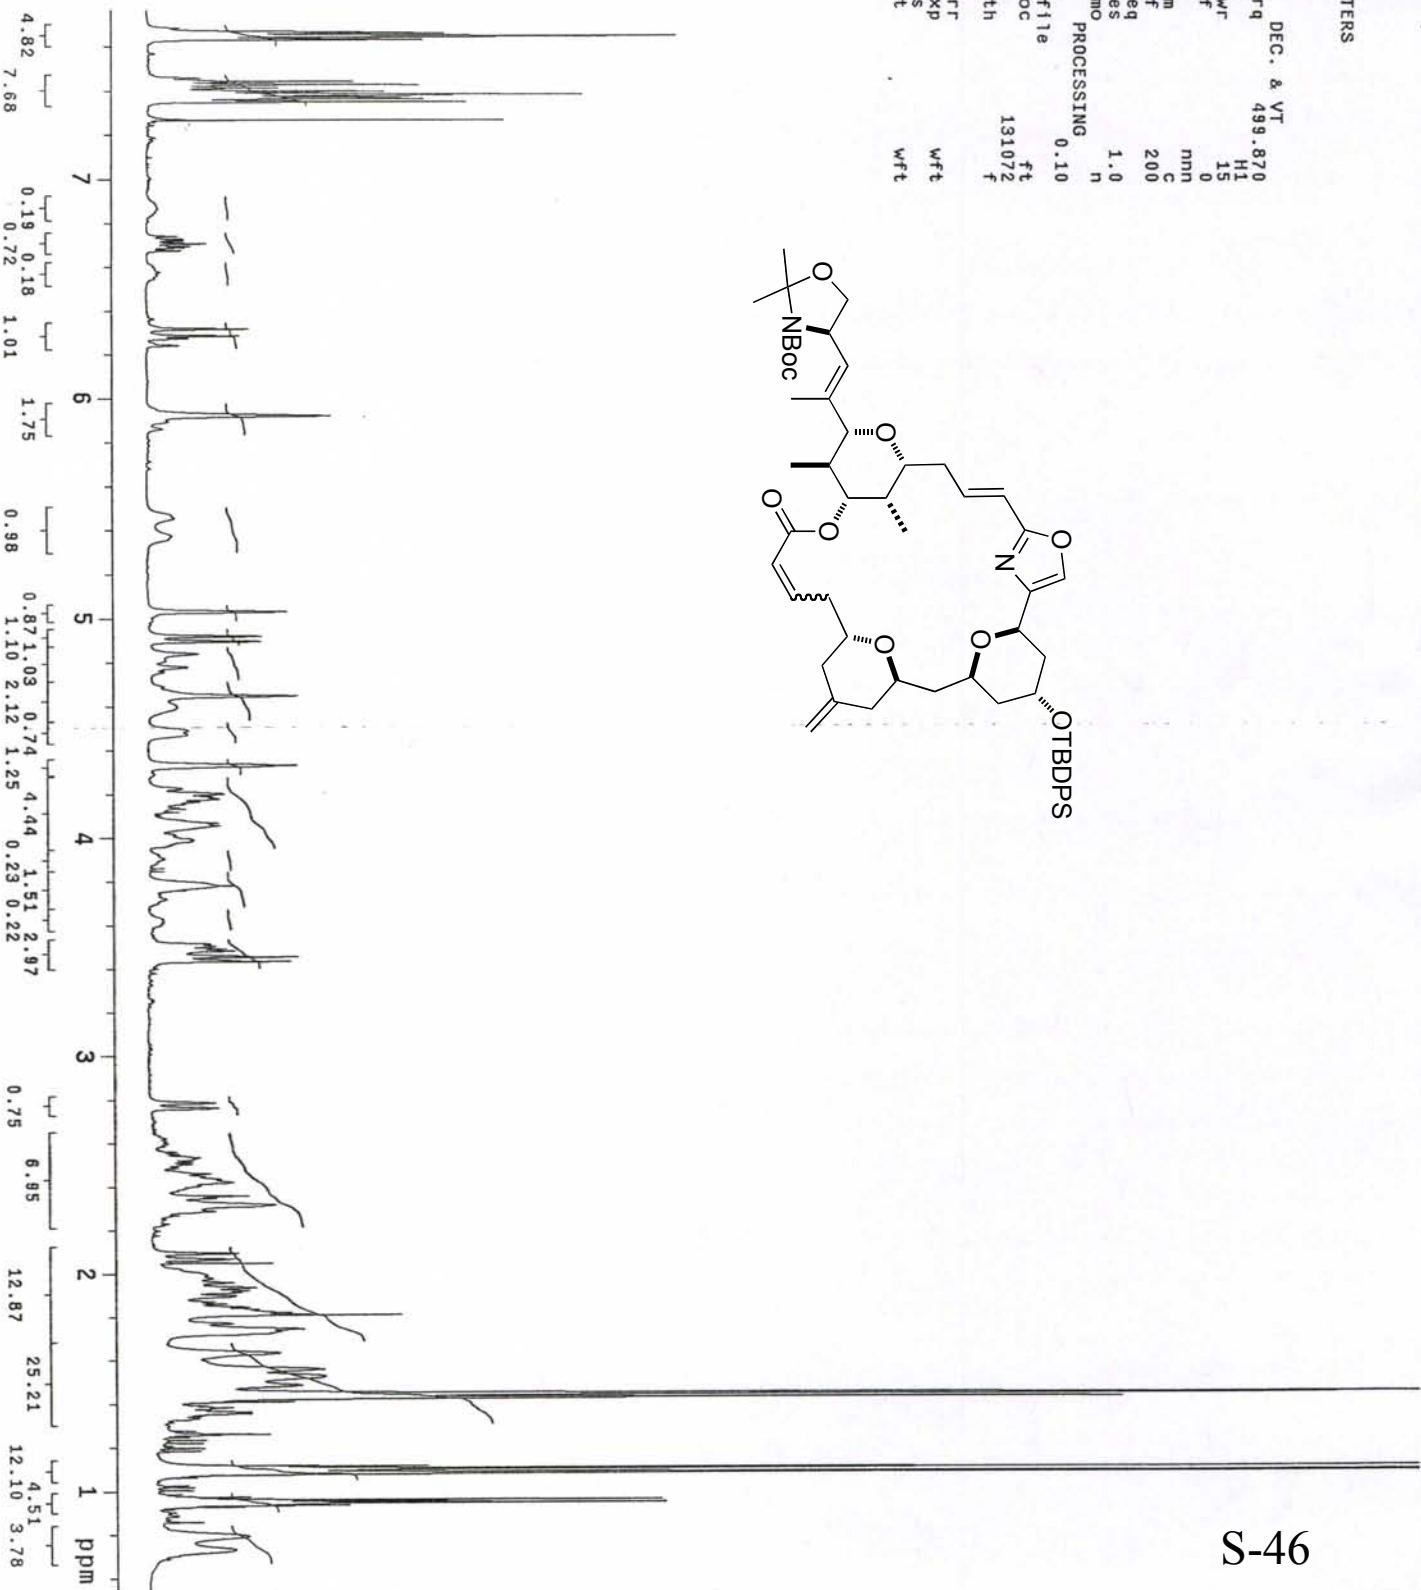

$^1\text{H}$  NMR spectrum for the mixture of compound **14** and **15** (**14** : **15** = 4 : 1)

# STANDARD PROTON PARAMETERS

expi szpu1

SAMPLE Dec 13 97 dfrq DEC. & VT 499.870  
 solvent CDCl3 dn H1  
 file /remote/data/~ cforde/rciv53\_1 dpwr 15  
 cforde/rciv53\_1 dof 0  
 ACQUISITION  
 sfrq 499.871 dm nnn  
 tn H1 dmm c  
 at 2.001 dseq 200  
 np 40000 dres 1.0  
 sw 9997.5 homo n  
 fb 6000  
 bs 16 dfrq2 DEC2 0  
 tpwr 58 dn2  
 plw 7.1 dpwr2 1  
 dl 1.500 dof2 0  
 tof 1504.1 dm2 n  
 nt 16 dmm2 n  
 ct 16 dmf2 C  
 alock n dseq2 200  
 gain not used dres2  
 flags homo2 1.0  
 i1 n  
 in n  
 dp n  
 hs y  
 DISPLAY yb  
 sp 284.9 yb  
 wp 3697.4 yb  
 vs 163 fn  
 sc 0 math  
 wc 210 warr  
 hzmm 17.61 wbs  
 is 39.57 wft  
 rfl 4614.4 wft  
 rfp 3619.1 wft  
 th 7  
 ins 100.000  
 al cdc ph

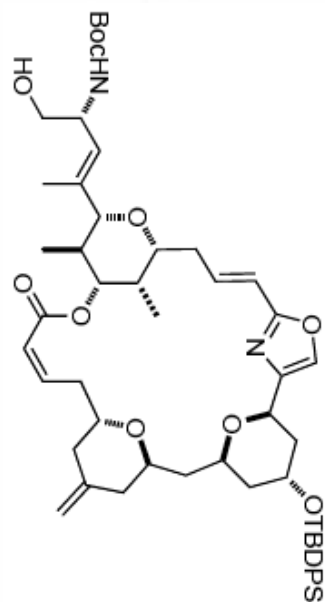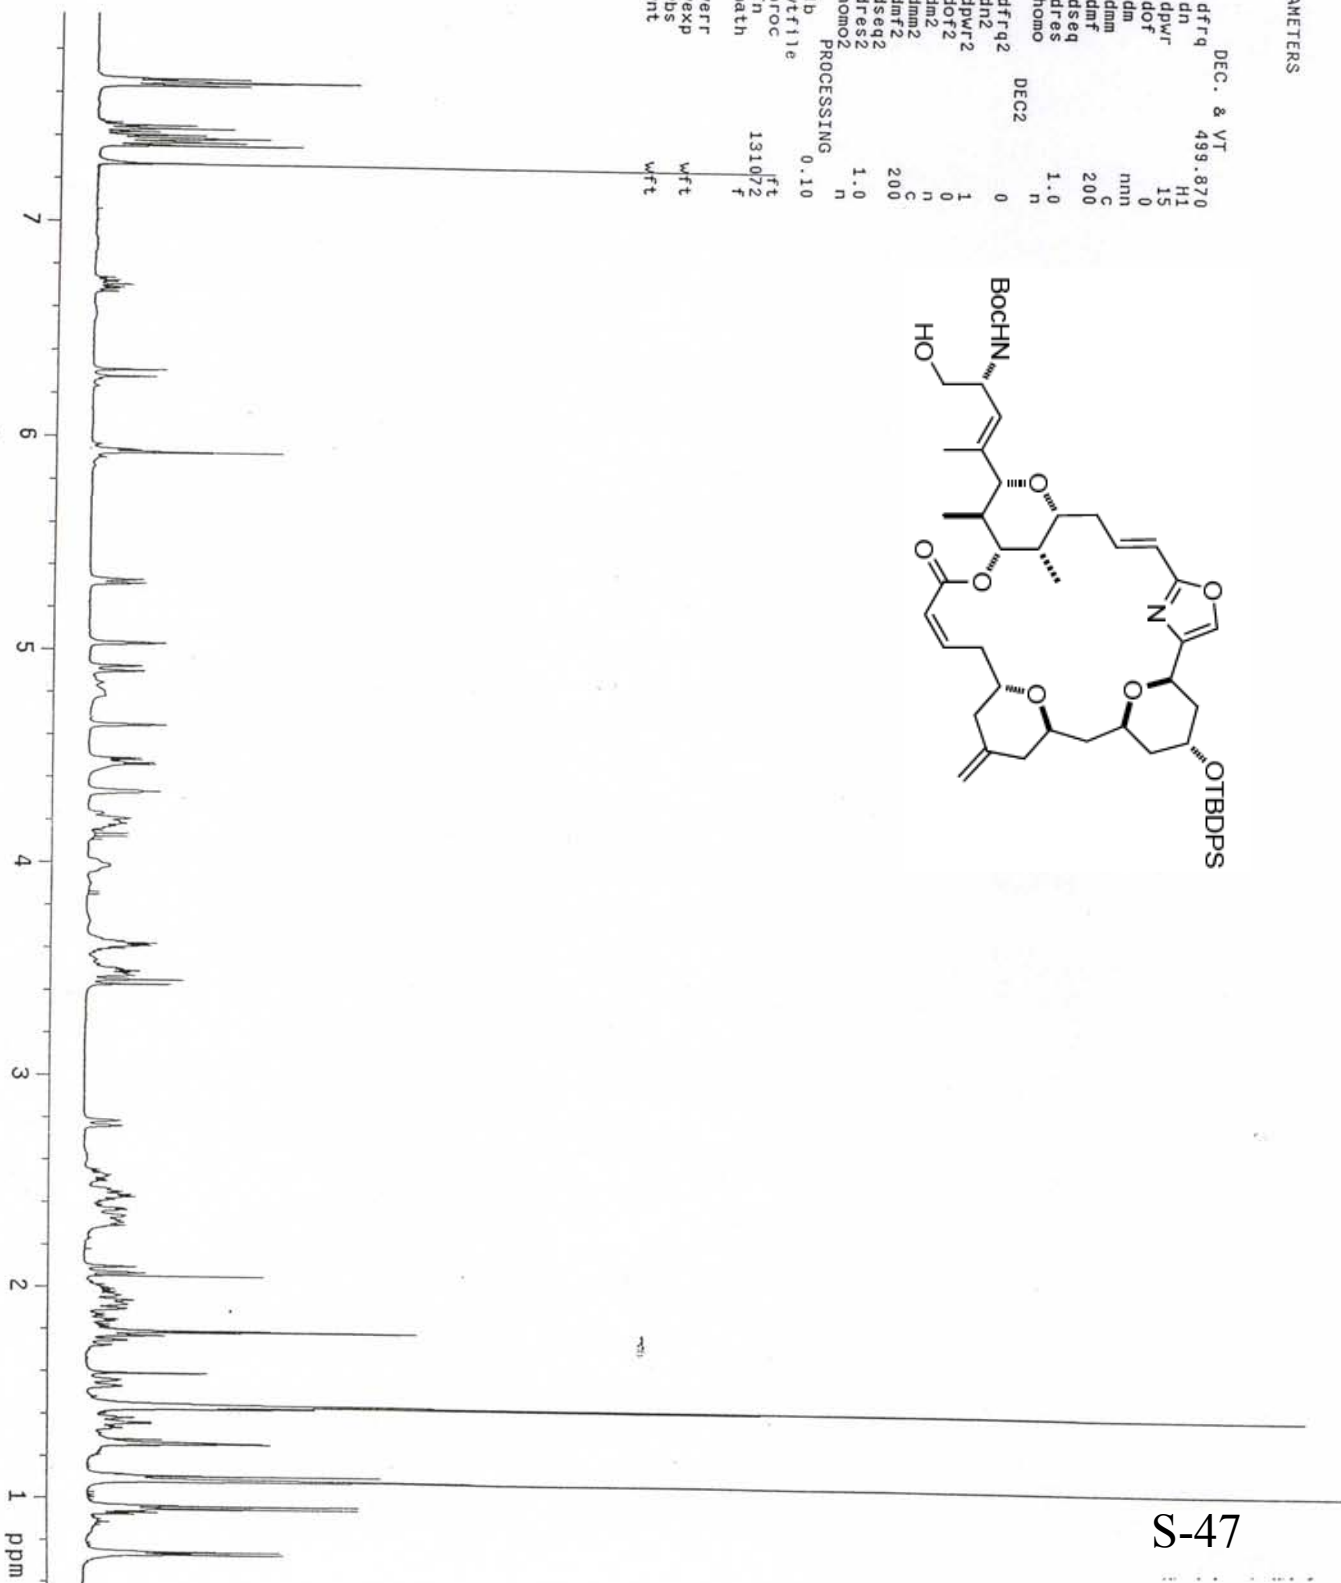

<sup>1</sup>H NMR spectrum for compound 16

13C OBSERVE

exptl std13c

SAMPLE  
 date Dec 17 97  
 solvent CDCl3  
 file /remote/data/~  
 cfordc/rciv55c  
 ACQUISITION  
 sfrq 75.485  
 tn C13  
 at 0.800  
 np 27776  
 sw 17361.1  
 fb 10000  
 bs 16  
 tpwr 51  
 pw 10.1  
 di 0.100  
 d2 1.900  
 tof 215.1  
 nt 1856  
 ct 1856  
 alock s  
 gain not used  
 flags n  
 l1 n  
 l2 n  
 dp y  
 hs nm  
 DISPLAY  
 sp -45.9  
 wp 13070.6  
 vs 200  
 sc 0  
 wc 210  
 hzmm 62.24  
 ls 500.00  
 rfl 6731.2  
 rfp 5812.4  
 th 20  
 ins 1.000  
 nm no ph

DEC. & VT  
 300.170  
 H1  
 36  
 -300.0  
 ny  
 5800  
 g  
 1.0  
 n  
 PROCESSING  
 1.00  
 lb  
 wfile  
 ft  
 fn  
 131072  
 f  
 math  
 werr  
 wexp  
 wbs  
 wft  
 wft

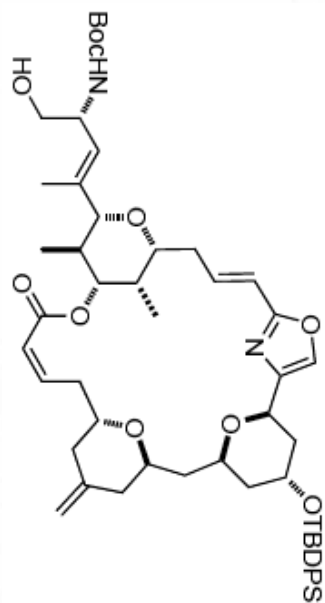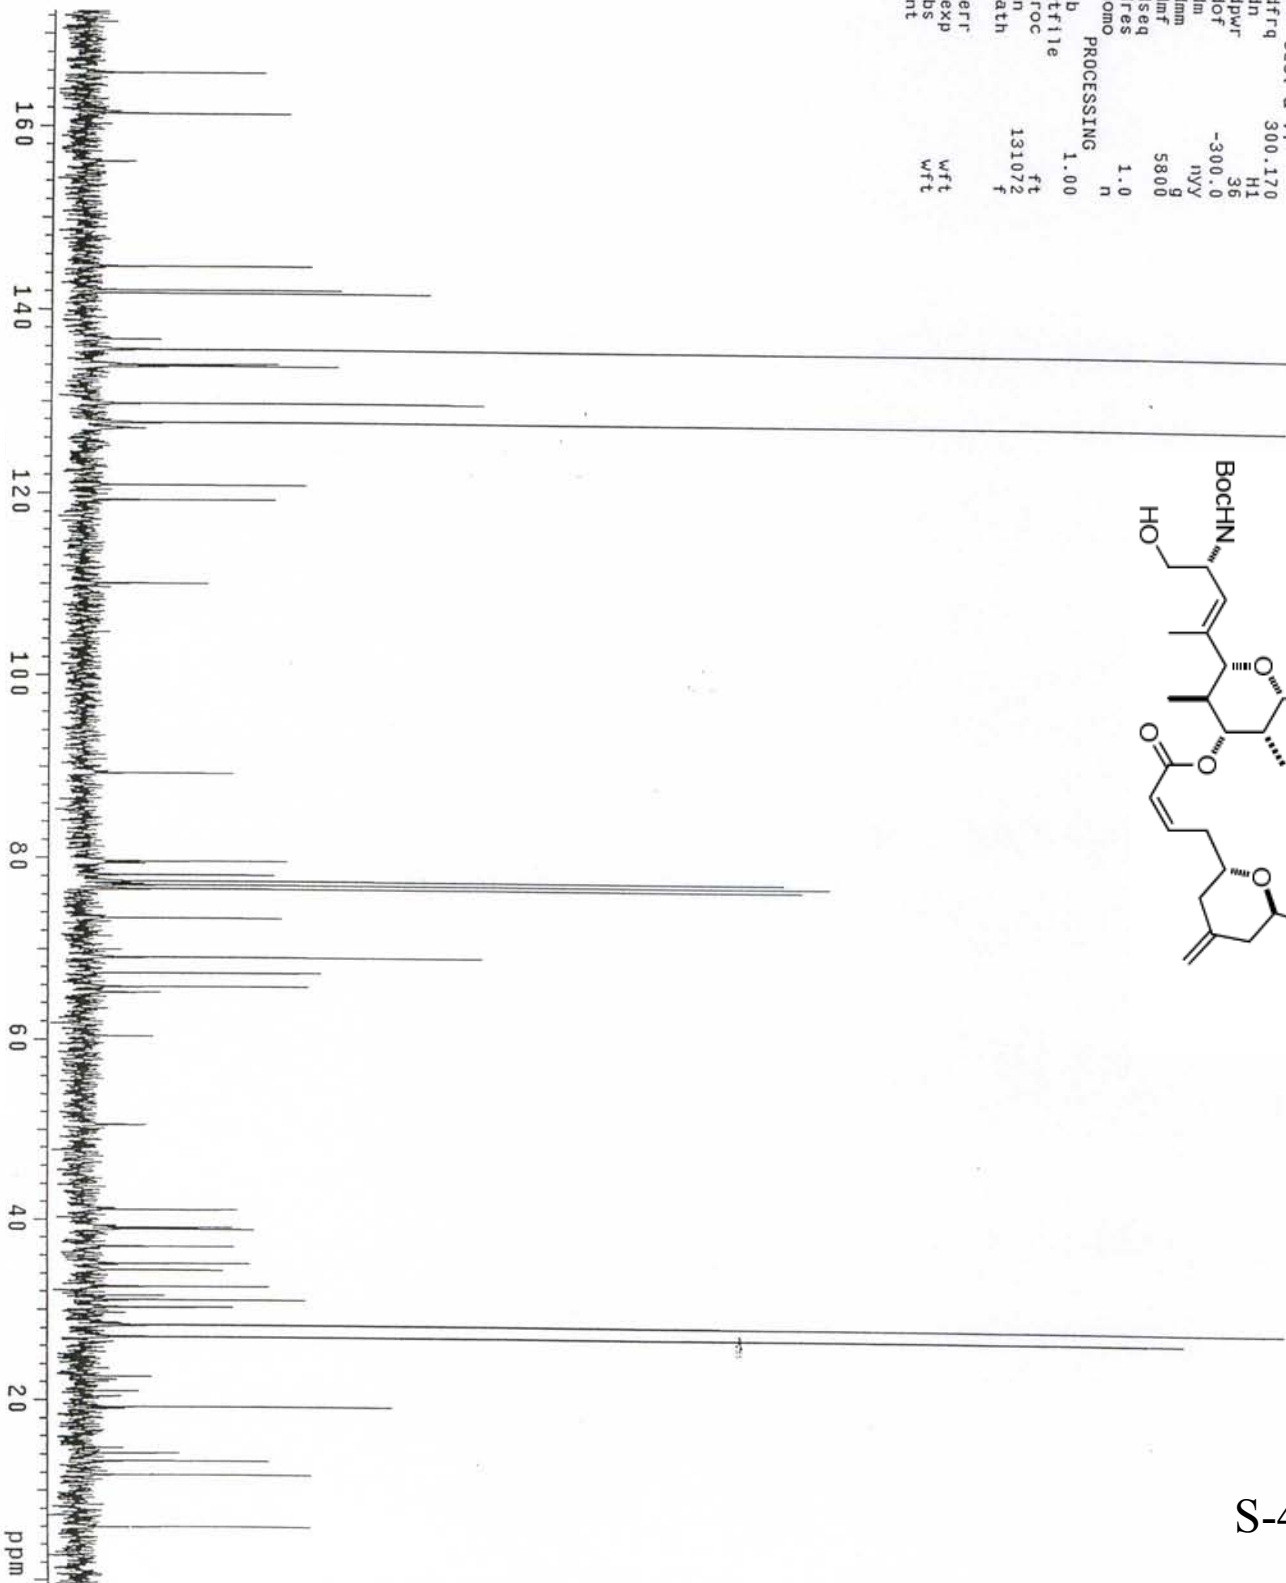

<sup>13</sup>C NMR spectrum for compound 16

Univ of Minnesota, VI 296  
 Pulse Sequence: szpul  
 Date: Jul. 15, 2002  
 Solvent: CDCl3  
 Starting Time: 17:20:18  
 Completion Time: 17:20:47  
 Total acq. time 1 minute  
 UNITplus-500 "v1500"  
 Ambient temperature  
 PULSE SEQUENCE  
 Relax. delay 1.500 sec  
 Pulse 90.0 degrees  
 Acq. time 1.832 sec  
 Width 8000.0 Hz  
 4 repetitions  
 OBSERVE H1, 499.8671219 MHz  
 DATA PROCESSING  
 Line broadening 0.1 Hz  
 FI size 32768

7.656  
 7.647  
 7.643  
 7.640  
 7.634  
 7.631  
 7.443  
 7.437  
 7.430  
 7.427  
 7.416  
 7.395  
 7.390  
 7.385  
 7.380  
 7.370  
 7.366  
 7.357  
 7.266  
 6.985  
 6.220  
 6.188

4.896  
 4.872  
 4.859  
 4.771  
 4.340

3.712  
 3.693  
 3.628  
 3.618  
 3.598

2.282  
 2.276  
 2.255  
 2.029  
 2.006  
 1.984  
 1.974  
 1.969  
 1.948  
 1.943  
 1.758  
 1.623  
 1.456  
 1.436  
 1.418  
 1.259  
 1.107  
 0.912  
 0.899  
 0.759  
 0.747

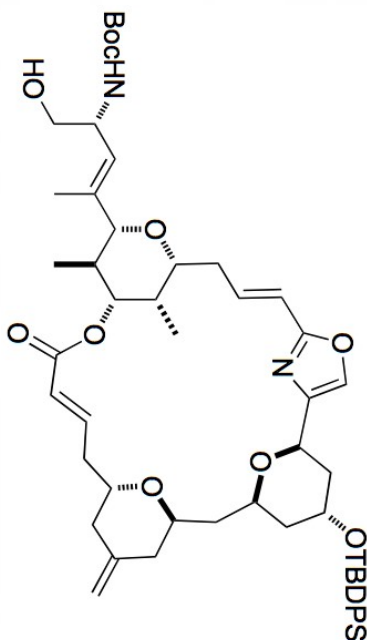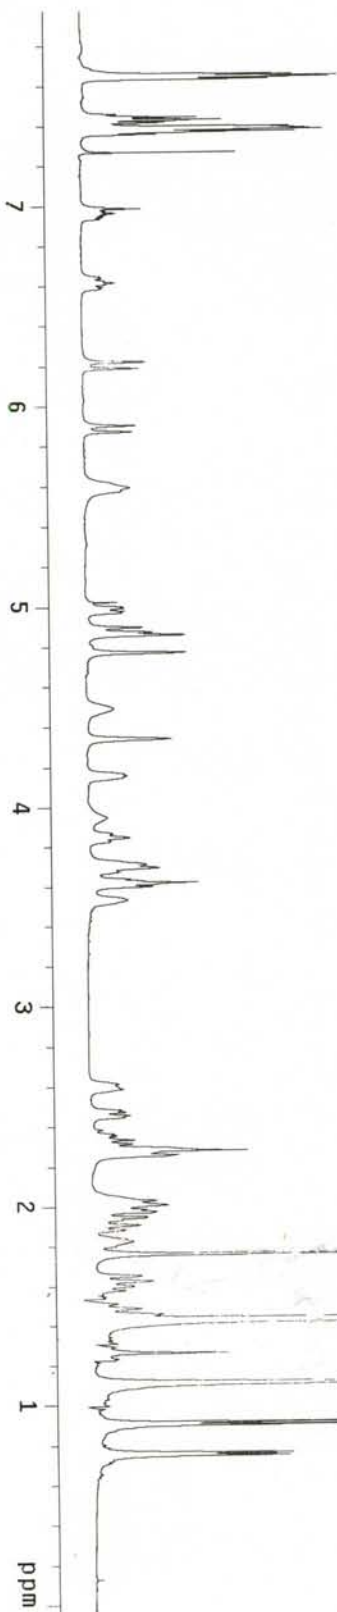

<sup>1</sup>H NMR spectrum for compound 17

Pulse Sequence: s2pul  
Spin rate: 20  
Date: Jul 15, 2002  
Solvent: CDCl<sub>3</sub>  
Starting time: 14:42:55  
Total acq. time 59 minutes  
UNITYplus-300 "vxr300"  
Ambient temperature  
PULSE SEQUENCE  
Relax. delay 0.100 sec  
Pulse 67.5 degrees  
Acq. time 0.801 sec  
Width 18867.9 Hz  
1264 repetitions  
OBSERVE C13, 75.3995910 MHz  
DECOUPLE H1, 299.8604072 MHz  
Power 38 dB  
on during acquisition  
off during delay  
WALTZ-16 modulated  
DATA PROCESSING  
Line broadening 1.5 Hz  
FT size 65536

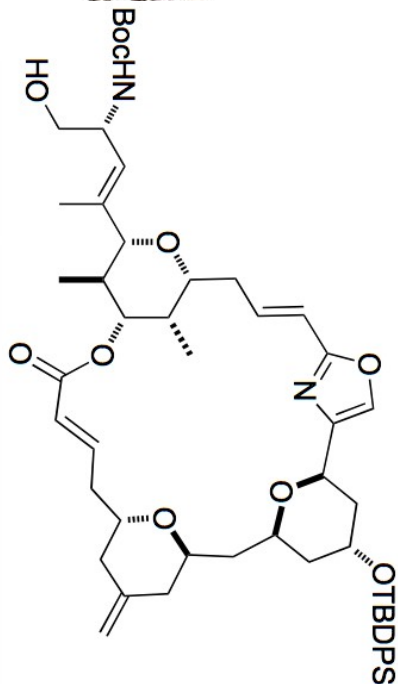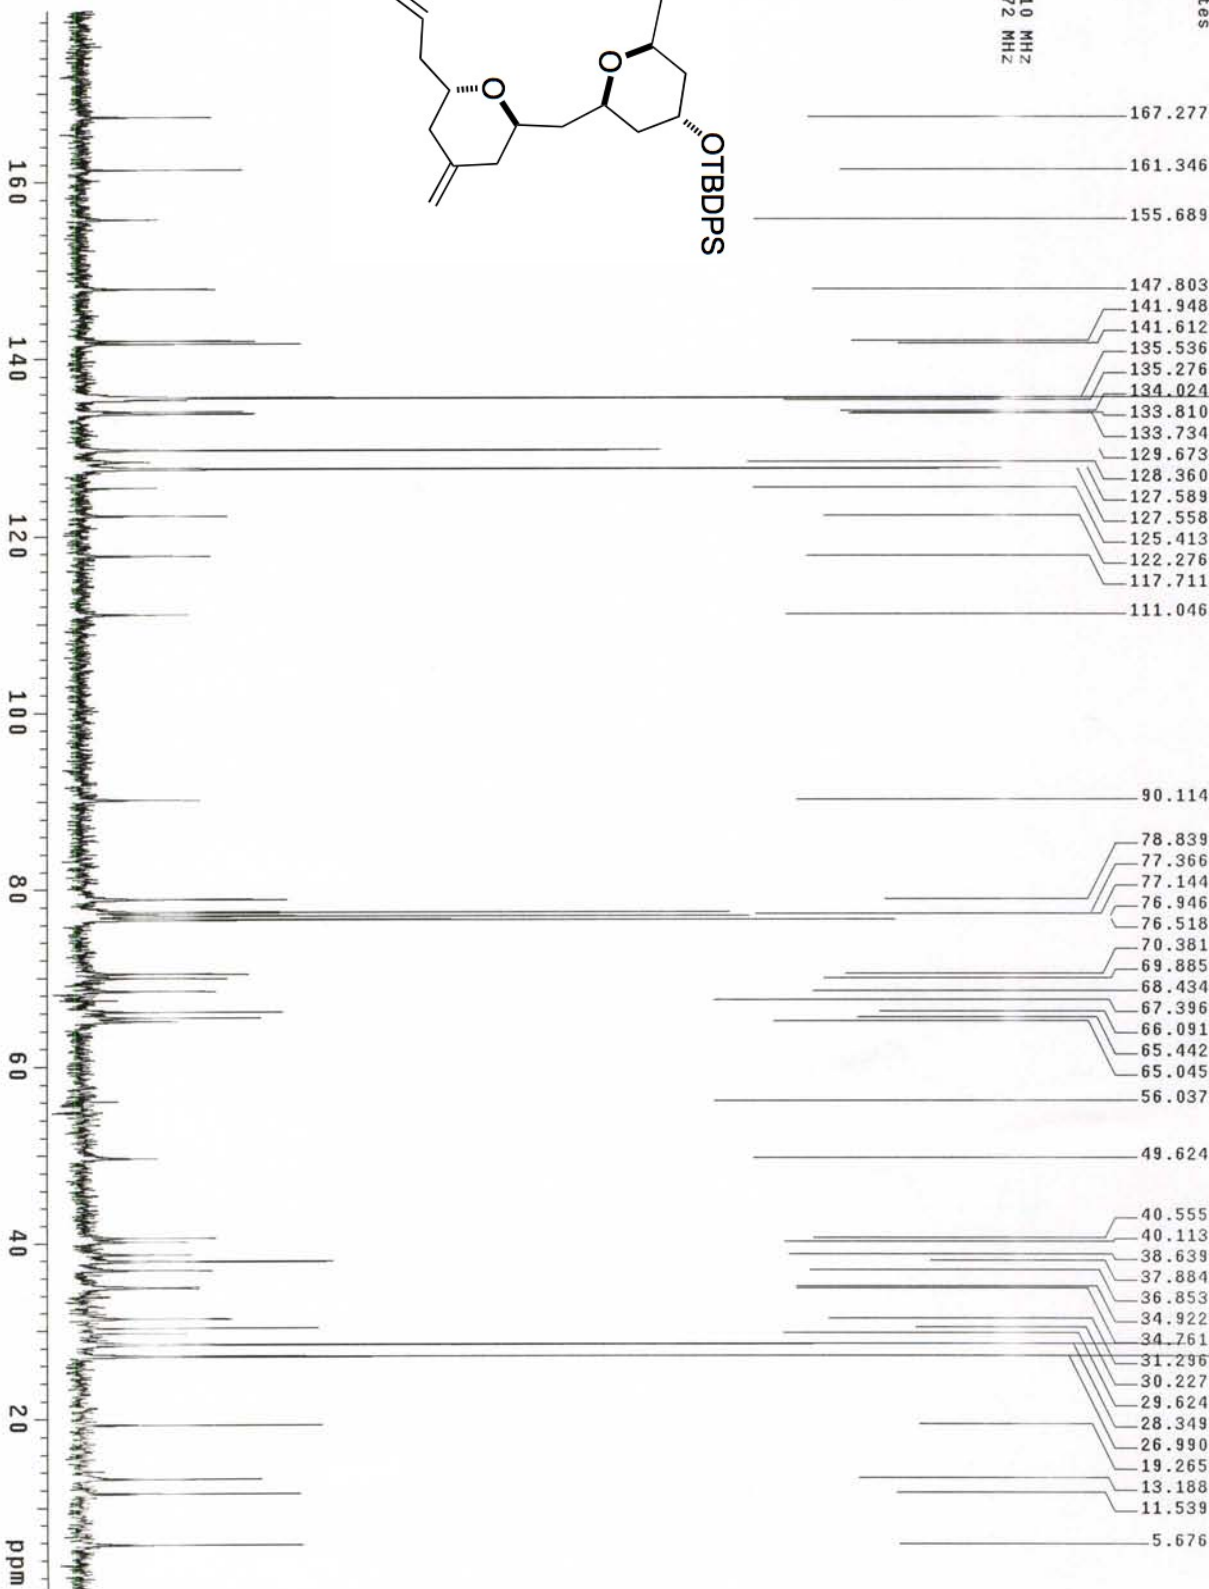

<sup>13</sup>C NMR spectrum for compound 17

Univ of Minnesota  
 Date: Jun. 22, 2006  
 Solvent: cdcl3  
 Starting Time: 16:42:55  
 Total acq. time 1 minute  
 UNITYplus-500 "v1500"  
 Ambient temperature  
 PULSE SEQUENCE  
 Relax. delay 1.500 sec  
 Pulse 45.0 degrees  
 Acq. time 1.892 sec  
 Width 8000.0 Hz  
 16 repetitions  
 OBSERVE H1, 499.8671219 MHz  
 DATA PROCESSING  
 FT size 131072

8.046  
 7.846  
 7.823  
 7.816  
 7.801  
 7.422  
 7.414  
 7.408  
 7.390  
 7.382  
 7.369  
 7.355  
 7.341  
 7.265  
 4.801  
 4.740  
 4.323  
 4.299  
 4.268  
 4.258  
 4.133  
 4.118  
 4.109  
 4.034  
 4.003  
 3.983  
 3.958  
 3.943  
 3.883  
 3.870  
 3.851  
 3.756  
 3.746  
 3.733  
 3.723  
 2.759  
 2.433  
 2.399  
 2.390  
 2.315  
 2.309  
 2.289  
 2.269  
 2.262  
 2.092  
 2.073  
 2.067  
 2.050  
 1.854  
 1.839  
 1.829  
 1.816  
 1.800  
 1.787  
 1.773  
 1.759  
 1.639  
 1.630  
 1.606  
 1.593  
 1.563  
 1.538  
 1.528  
 1.513  
 1.494  
 1.467  
 1.431  
 1.418  
 1.400  
 1.342  
 1.318  
 1.292  
 1.278  
 1.263  
 1.249  
 1.087  
 1.074  
 1.053  
 0.919  
 0.907

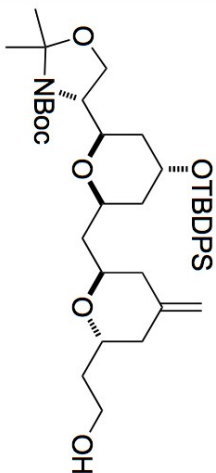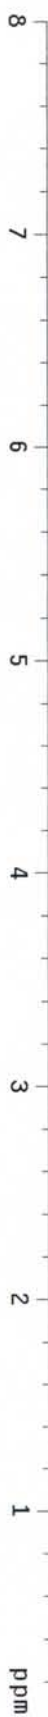

<sup>1</sup>H NMR spectrum for compound 51

Date: Jul. 31, 2005  
 File: BW-Phorb-RCM-C3a1 conol-C  
 Starting time: 16:14:27  
 Completion time: 17:20:07  
 Total acq. time 65 minutes  
 UNITYplus-500 "v1500"  
 Ambient temperature  
 PULSE SEQUENCE  
 Relax. delay 5.000 sec  
 Pulse 67.5 degrees  
 Acq. time 0.960 sec  
 Width 32989.7 Hz  
 500 repetitions  
 OBSERVE C13, 125.6916844 MHz  
 DECOUPLE H1, 499.8696213 MHz  
 Power 36 dB  
 on during acquisition  
 off during delay  
 WALTZ-16 modulated  
 DATA PROCESSING  
 Line broadening 1.0 Hz  
 FT size 65536

141.891  
 141.715  
 135.812  
 135.732  
 135.652  
 135.628  
 134.419  
 133.970  
 133.802  
 129.789  
 129.749  
 129.685  
 129.597  
 127.779  
 127.715  
 127.683  
 127.579  
 110.447  
 110.391  
 93.932  
 93.428  
 80.285  
 79.852  
 77.377  
 77.121  
 76.865  
 71.082  
 71.050  
 70.401  
 70.273  
 69.897  
 69.768  
 69.696  
 65.948  
 65.908  
 63.617  
 63.369  
 60.750  
 60.310  
 59.413  
 59.340  
 56.641  
 40.319  
 40.231  
 39.454  
 38.701  
 38.525  
 36.458  
 36.330  
 32.702  
 32.382  
 28.433  
 27.063  
 27.015  
 26.743  
 25.918  
 23.908  
 22.466  
 21.858  
 19.383  
 19.263  
 14.225

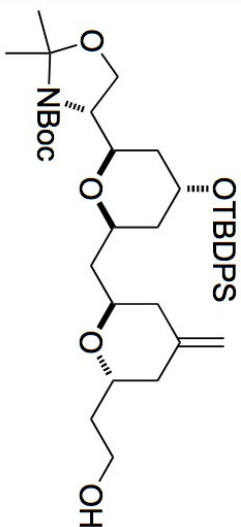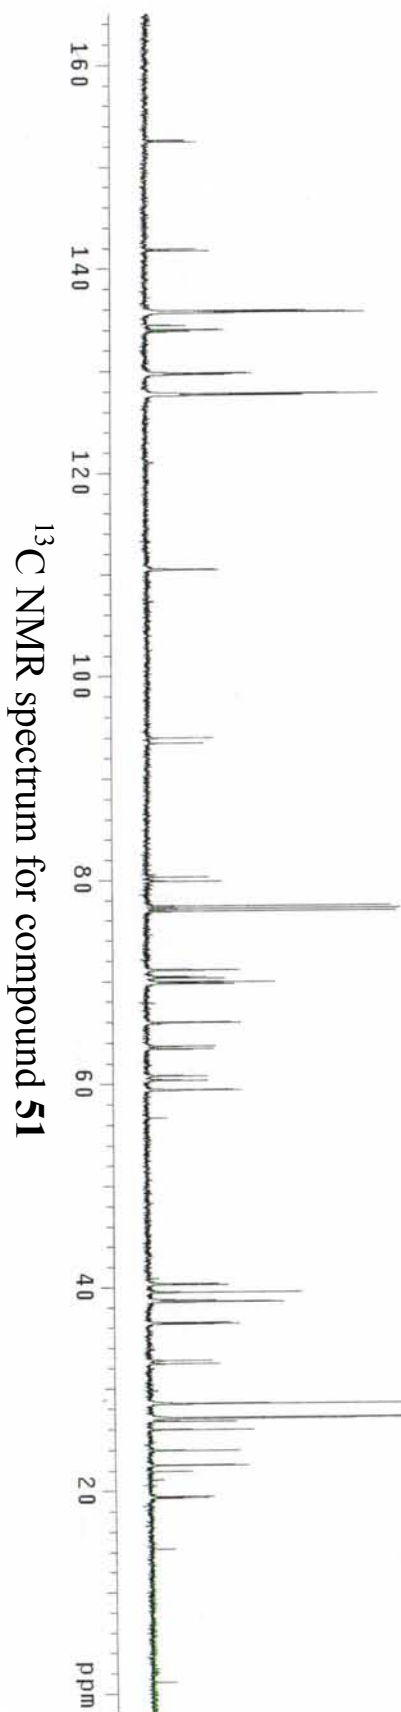

Univ of Minnesota, VI-2008  
 Pulse Sequence: s2pu1  
 User: cfohow  
 Date: Aug 3, 2005  
 Solvent: cdcl3  
 File: BW-Phorb-RCM-C3-alkene-H-500  
 Starting Time: 19:46:44  
 Total acq. time 1 minutes  
 UNITYplus-500 "field"  
 Ambient temperature  
 PULSE SEQUENCE  
 Relax. delay 1.500 sec  
 Pulse 90.0 degrees  
 Acq. time 1.892 sec  
 Width 8000.0 Hz  
 32 repetitions  
 OBSERVE H1 499.8671219 MHz  
 DATA PROCESSING  
 FT size 32768

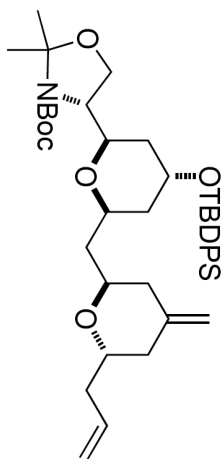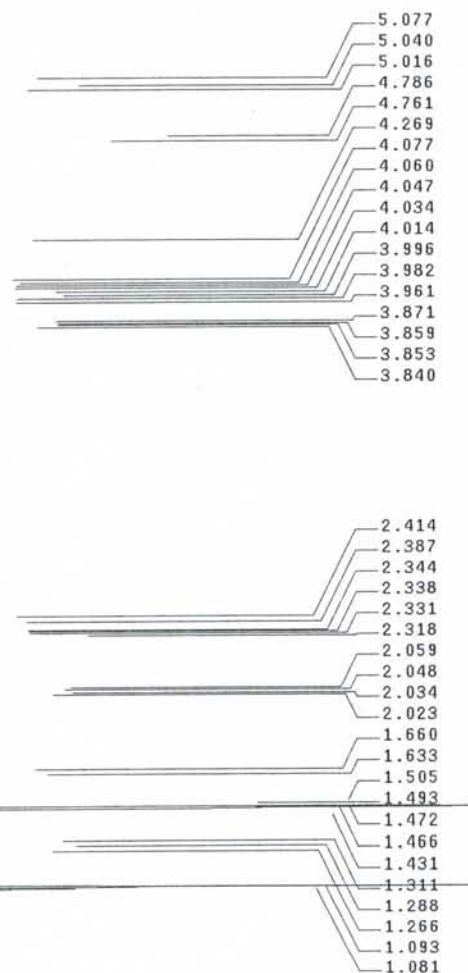

<sup>1</sup>H NMR spectrum for compound 21

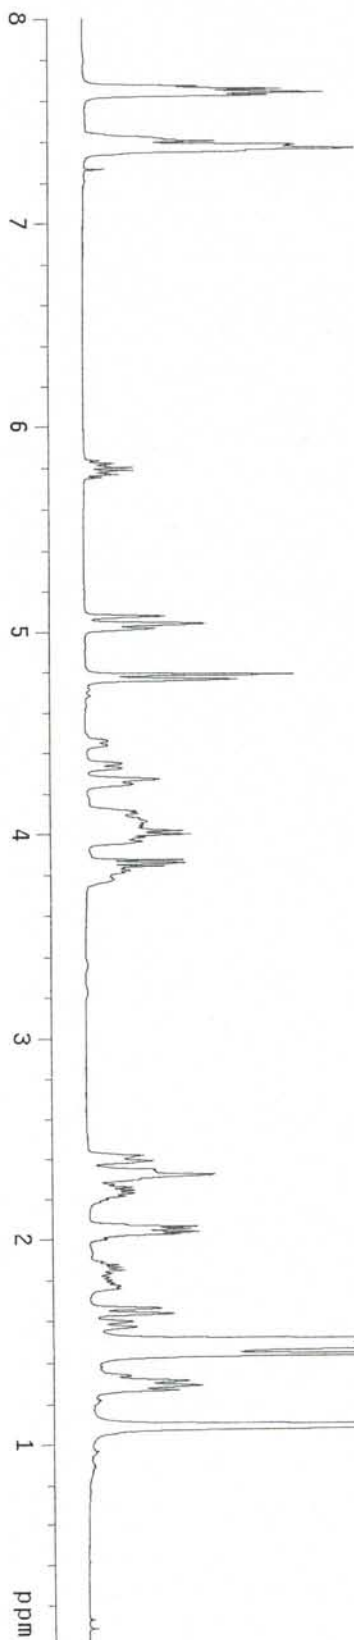

Univ of Minnesota, VI-500  
Pulse Sequence: s2pu1

Date: Aug. 3, 2005  
Solvent: cdc13  
Starting Time: 19:50:03  
Total acq. time 31 minutes  
UNITYplus-500 "v1500"  
Ambient temperature  
PULSE SEQUENCE  
Relax. delay 5.000 sec  
Pulse 67.5 degrees  
Acq. time 0.960 sec  
Width 32989.7 Hz  
240 repetitions  
OBSERVE C13, 125.6916844 MHz  
DECOUPLE H1, 499.8696213 MHz  
Power 36 dB  
on during acquisition  
off during delay  
WALTZ-16 modulated  
DATA PROCESSING  
Line broadening 1.0 Hz  
FT size 65536

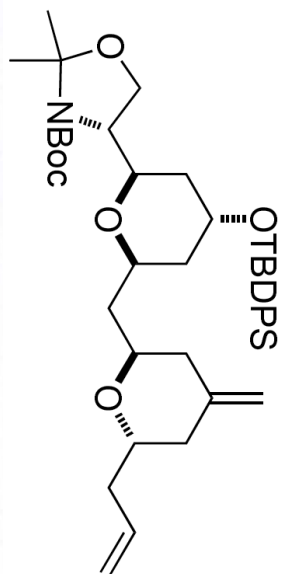

28.449

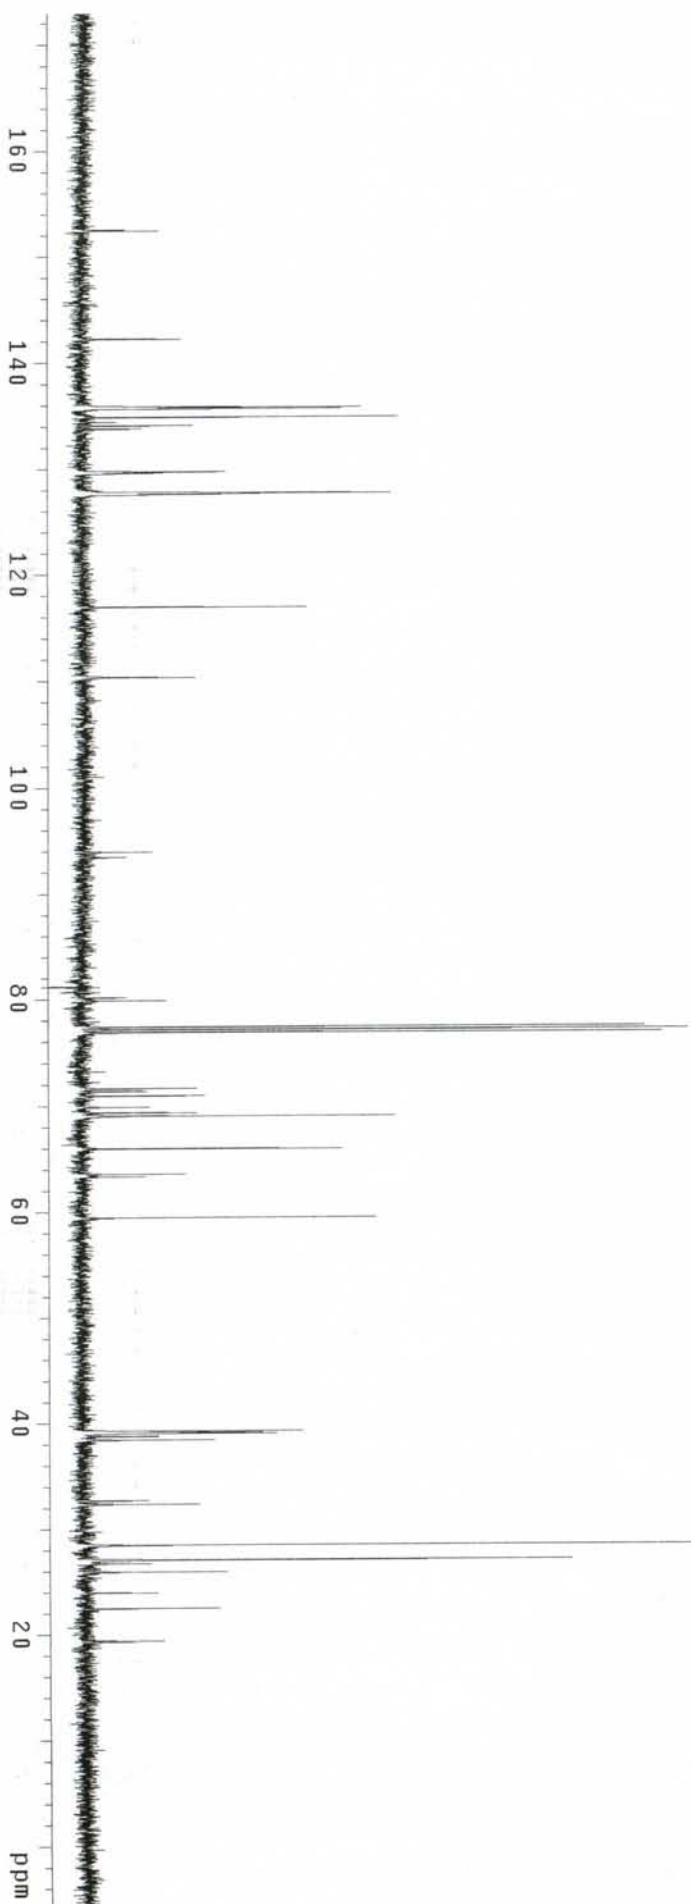

$^{13}\text{C}$  NMR spectrum for compound 21

Univ of Minnesota, VI-2007

Pulse Sequence: s2pul

User: cfobow

Date: Aug. 9, 2005

Solvent: cdc13

File: BW-Phorb-RCM-C3-C30-amide-H-500-A

Starting Time: 20:10:48

Total acq. time 8 minutes

UNITplus-500 "field"

Ambient temperature

PULSE SEQUENCE

Relax. delay 1.500 sec

Pulse 90.0 degrees

Acq. time 1.892 sec

Width 8000.0 Hz

144 Repetitions

OBSERVE H1 499.8671219 MHz

DATA PROCESSING

FT size 32768

7.592  
7.437  
7.422  
7.408  
7.375  
7.361  
7.346  
7.265  
6.272  
6.255  
5.878  
5.847  
5.124  
5.100  
5.093  
4.799  
4.755  
4.265  
4.241  
4.194  
4.042  
4.026  
4.015  
3.974  
3.965  
3.952  
3.842  
3.831  
3.823  
3.765  
3.748  
3.428  
3.275  
3.255  
2.464  
2.448  
2.249  
2.242  
2.221  
2.208  
2.195  
2.077  
2.070  
2.042  
1.735  
1.717  
1.705  
1.688  
1.666  
1.655  
1.633  
1.614  
1.562  
1.539  
1.502  
1.428  
1.400  
1.390  
1.327  
1.321  
1.298  
1.253  
1.197  
1.078  
0.965  
0.950  
0.935  
0.918  
0.886  
0.777  
0.607  
0.592  
0.577

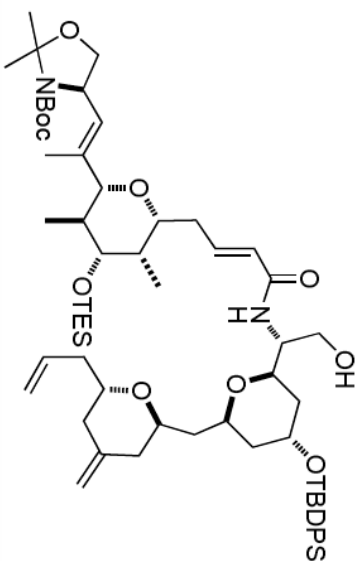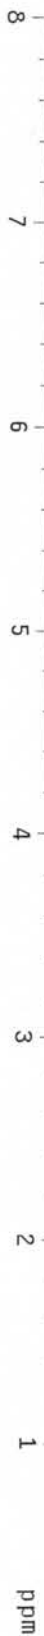

<sup>1</sup>H NMR spectrum for compound 23

<sup>13</sup>C NMR spectrum for compound **23**

Univ of Minnesota, VI-309  
 Date: Aug. 13, 2005  
 Solvent: cdcl3  
 Starting Time: 00:19:01  
 Completion Time: 00:19:20  
 Total acq. time 1 minute  
 UNITYplus-500 "v1500"  
 Ambient temperature  
 PULSE SEQUENCE  
 Relax. delay 1.500 sec  
 Pulse 90.0 degrees  
 Acq. time 1.892 sec  
 Width 8000.0 Hz  
 Single scan  
 OBSERVE H1, 499.8671219 MHZ  
 DATA PROCESSING  
 Line broadening 0.1 Hz  
 FT size 32768

Pulse Sequence: s2pu1  
 7.809  
 7.803  
 7.656  
 7.639  
 7.626  
 7.430  
 7.423  
 7.413  
 7.390  
 7.379  
 7.366  
 7.352  
 6.546  
 6.542  
 5.059  
 5.056  
 5.030  
 5.021  
 5.011  
 4.994  
 4.775  
 4.764  
 4.725  
 4.308  
 4.230  
 4.032  
 4.021  
 3.802  
 3.789  
 3.769  
 3.296  
 3.276  
 2.325  
 2.318  
 2.304  
 2.294  
 2.278  
 2.269  
 2.224  
 2.210  
 2.033  
 2.017  
 2.007  
 1.991  
 1.981  
 1.781  
 1.758  
 1.741  
 1.735  
 1.731  
 1.712  
 1.677  
 1.627  
 1.555  
 1.515  
 1.478  
 1.437  
 1.392  
 1.350  
 1.103  
 1.088  
 1.069  
 0.991  
 0.976  
 0.960  
 0.945  
 0.939  
 0.921  
 0.915  
 0.901  
 0.793  
 0.660  
 0.644  
 0.620  
 0.605

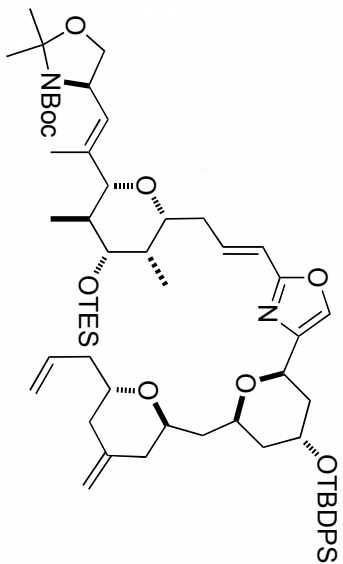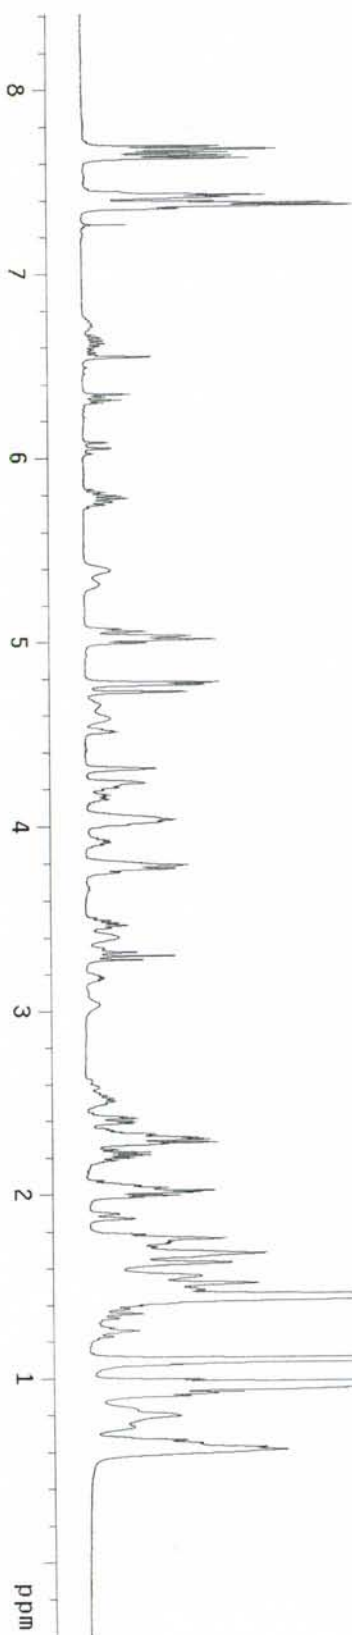

<sup>1</sup>H NMR spectrum for compound 24

161.533  
160.719  
160.272  
151.296  
142.788  
142.727  
141.971  
135.963  
135.711  
135.627  
134.703  
134.093  
133.902  
133.844  
133.734  
129.612  
128.940  
127.551  
118.527  
118.329  
116.894  
116.802  
110.237  
93.740  
88.442  
84.610  
82.610  
80.770  
79.557  
79.091  
78.755  
77.312  
77.205  
77.091  
76.892  
76.465  
71.671  
71.480  
71.404  
70.885  
69.190  
68.946  
68.595  
68.503  
68.014  
67.228  
65.633  
54.472  
42.372  
40.273  
40.197  
39.113  
39.008  
38.876  
38.685  
38.082  
37.966  
37.473  
36.296  
33.969  
33.455  
28.387  
27.486  
26.866  
24.911  
23.411  
19.155  
18.466  
17.191  
13.791  
13.591  
13.491  
13.08  
11.44  
11.15  
6.94  
6.76  
5.63  
5.50  
4.80

Pulse Sequence: s2pu1

Spin rate: 20  
Date: Aug

Date: Aug. 13, 2003  
Solvent: cdc13

File: BW-P

Starting time: 00:37:56  
Total acc. time 11.1 hours

UNITY-300 "U1300"

Ambient temperature  
ON11 plus -500 V1200

PULSE SEQUENCE

Relax. delay

Pulse 67.5 d

Acq. time 0.001 sec  
Width 18867.9 Hz

5184 repetitions

OBSERVE C13, 75.47  
DECOUPLE H1, 200.17

Power 38 dB

on during acquisition

off during delay  
WALTZ-16 modulated

## DATA PROCESSING

Line broaden

f1 size b553b

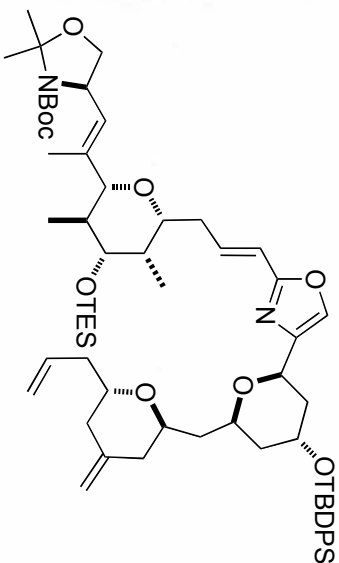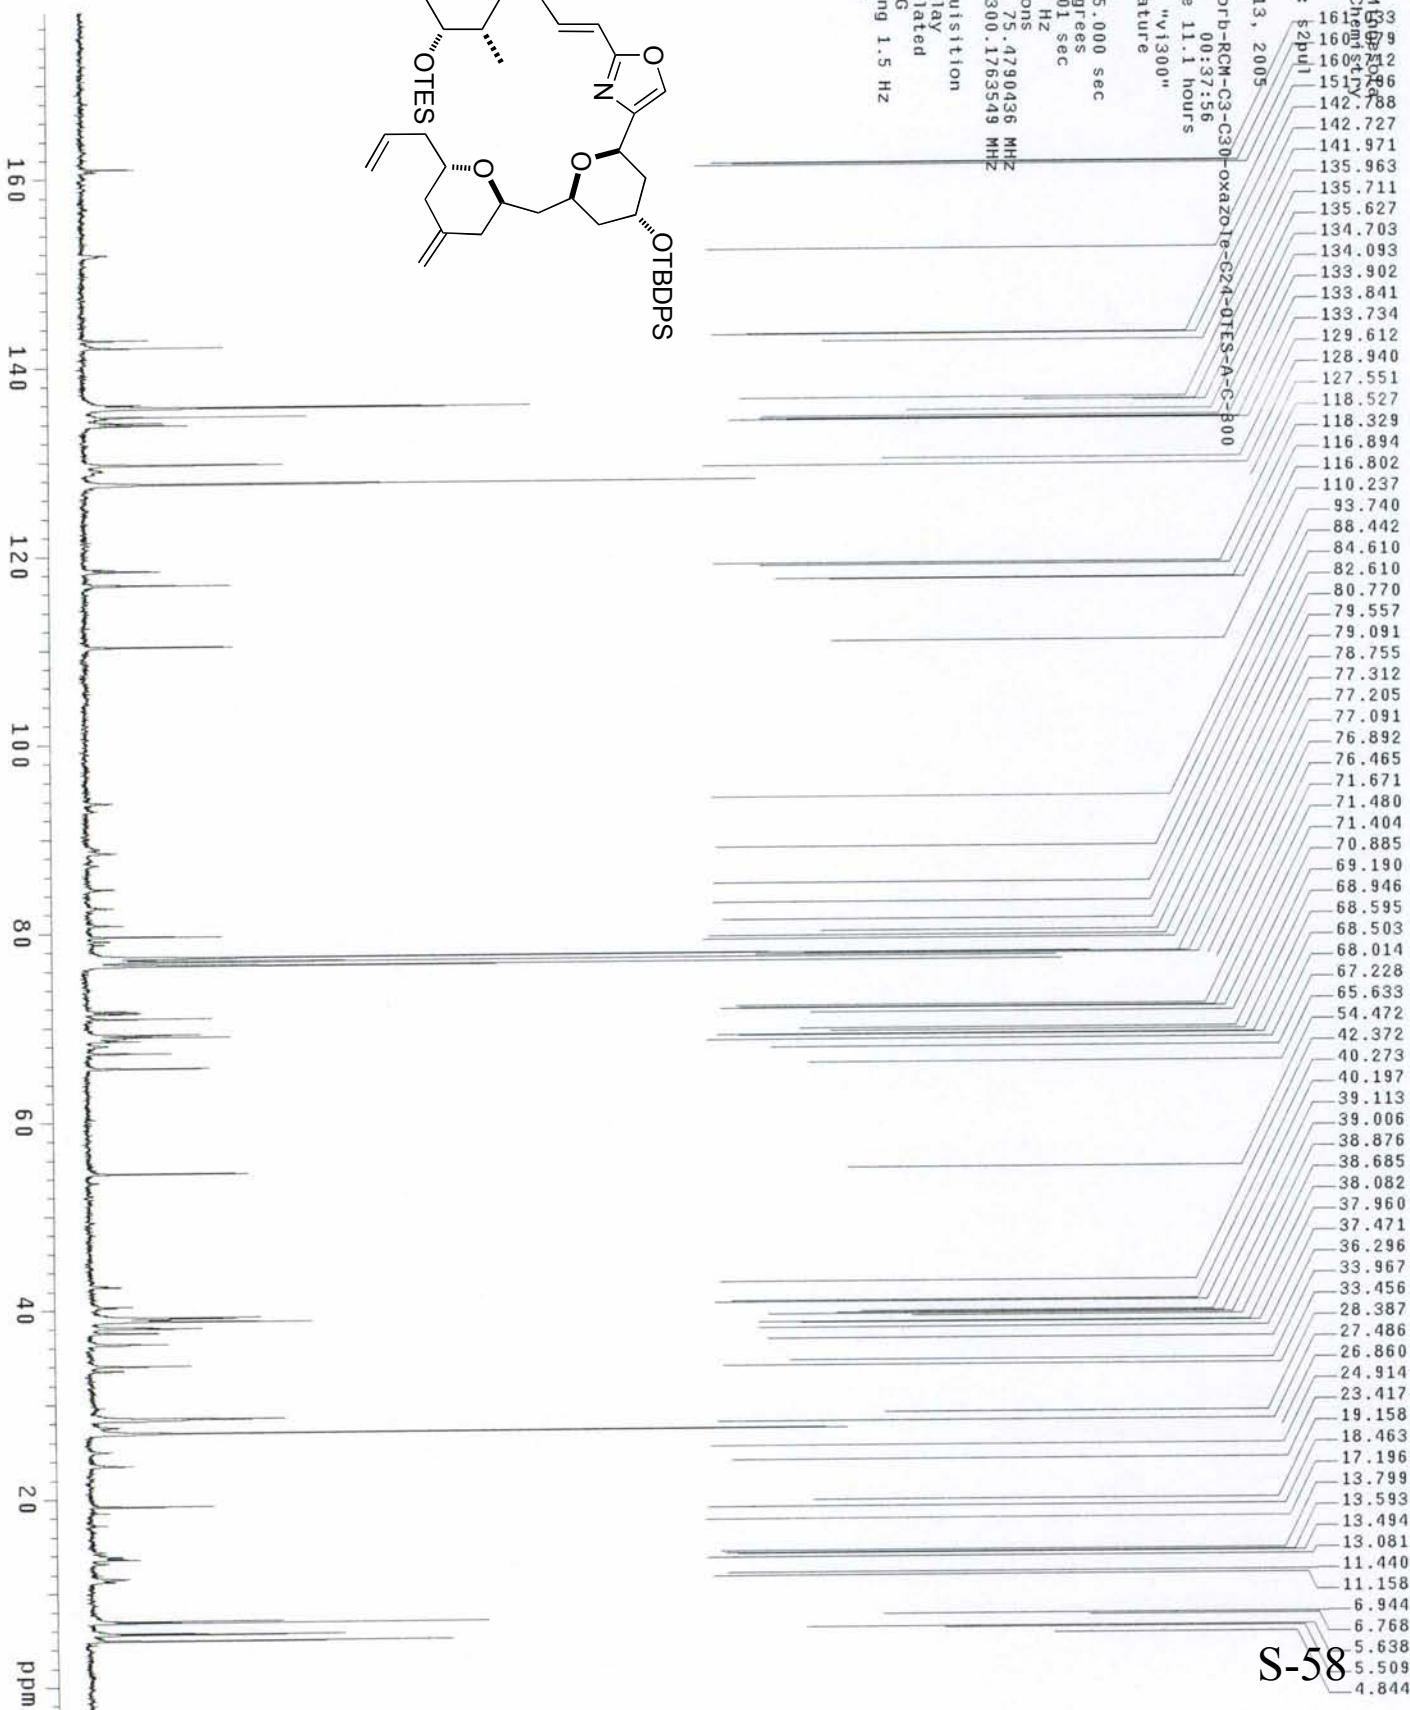

Univ of Minnesota, VI-87  
 7.873  
 7.870  
 7.670  
 7.654  
 7.652  
 7.431  
 7.423  
 7.412  
 7.390  
 7.378  
 7.376  
 7.366  
 7.266

Pulse Sequence: szpu1  
 User: cfobow  
 Date: Jul 30, 2005  
 Solvent: cdc13  
 File: BW-Phorb-RCM-acrylate-H-500  
 Starting Time: 10:08:19  
 Completion Time: 10:36:41  
 Total acq. time 28 minutes  
 UNITYplus-500 "field"  
 Ambient temperature

PULSE SEQUENCE  
 Relax. delay 1.500 sec  
 Pulse 90.0 degrees  
 Acq. time 1.892 sec  
 Width 8000.0 Hz  
 500 repetitions  
 OBSERVE H1 499.8671219 MHz  
 DATA PROCESSING  
 FT size 32768

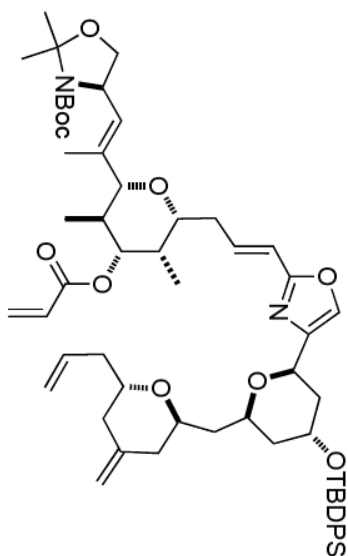

5.021  
 5.014  
 5.012  
 4.994  
 4.763  
 4.727  
 4.303  
 3.902  
 3.792  
 3.434  
 3.413  
 2.304  
 2.277  
 2.177  
 2.050  
 2.018  
 2.007  
 1.992  
 1.645  
 1.630  
 1.584  
 1.548  
 1.519  
 1.480  
 1.432  
 1.419  
 1.385  
 1.374  
 1.372  
 1.273  
 1.258  
 1.256  
 1.244  
 1.217  
 1.204  
 1.193  
 1.156  
 1.143  
 1.101  
 0.961  
 0.947  
 0.882  
 0.071

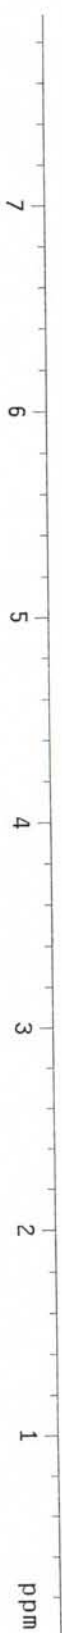

<sup>1</sup>H NMR spectrum for compound 19

University of Minnesota  
Department of Chemistry  
VAC-300

Pulse Sequence: s2pul1

Spin rate: 20

Date: Aug. 17, 2005

Solvent: cdc13

File: BW-Phorb-RCM-C3-C30-oxazole-C24-acrylate-C-300-dia

Starting time: 20:10:37

Total acq. time 12.1 hours

UNITplus-300 "v1300"

Ambient temperature

PULSE SEQUENCE

Relax. delay 5.000 sec

Pulse 67.5 degrees

Acq. time 0.801 sec

Width 1867.9 Hz

5648 repetitions

OBSERVE C13, 75.4790436 MHz

DECOUPLE H1, 300.1763549 MHz

Power 38 db

on during acquisition

off during delay

WALTZ-16 modulated

DATA PROCESSING

Line broadening 1.5 Hz

FT size 65336

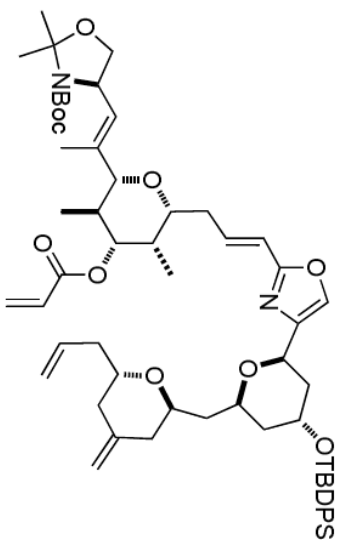

142.795  
141.956  
135.704  
135.627  
135.207  
134.703  
134.116  
133.917  
133.818  
130.787  
129.589  
128.390  
127.543  
118.642  
116.802

79.580  
79.045  
78.580  
77.320  
76.892  
76.694  
76.465  
70.923  
69.175  
68.938  
67.213  
65.640

54.464

39.876  
39.090  
38.975  
38.647  
37.983  
37.517  
35.914  
35.143  
31.754  
31.395  
29.532  
28.379  
28.166  
26.860  
24.906  
22.517  
19.150  
13.959  
12.715  
11.074  
5.982  
0.829

S-60

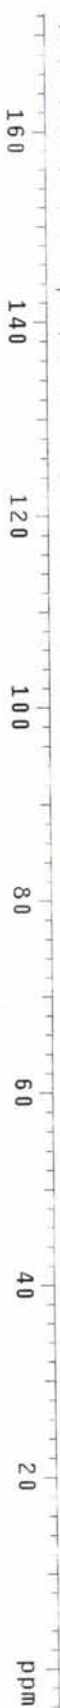

$^{13}\text{C}$  NMR spectrum for compound 19

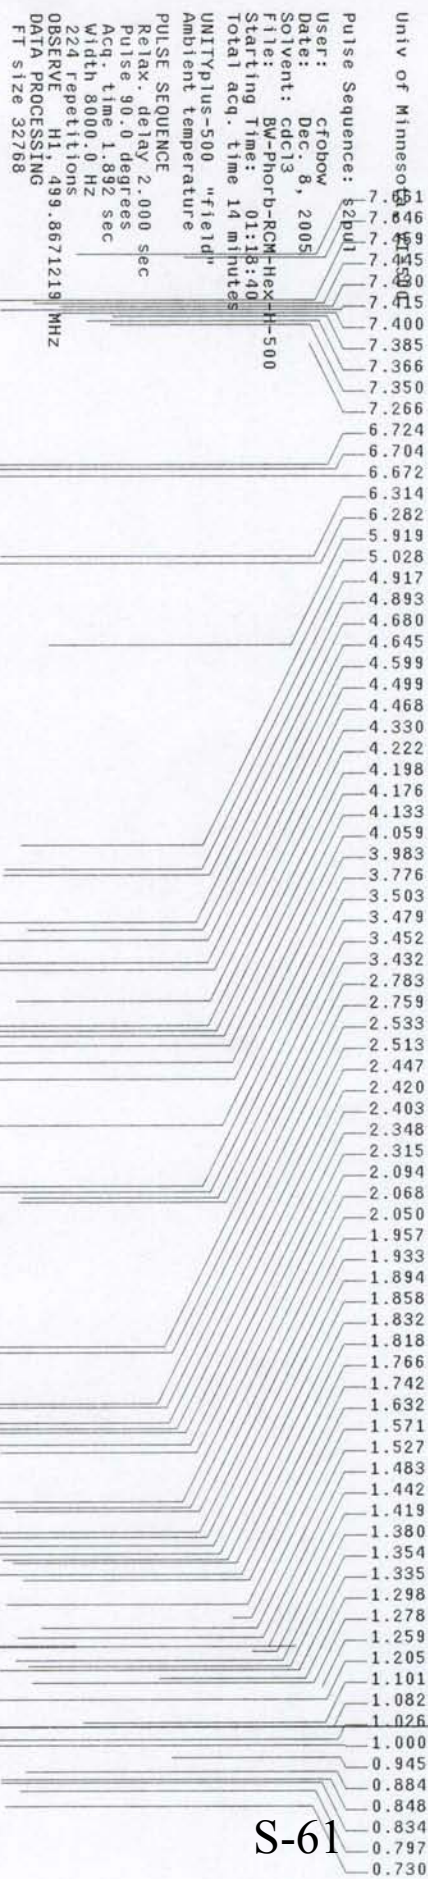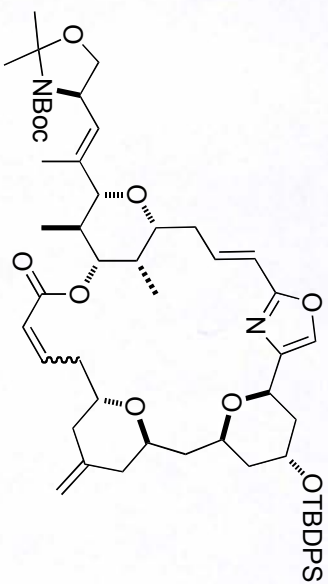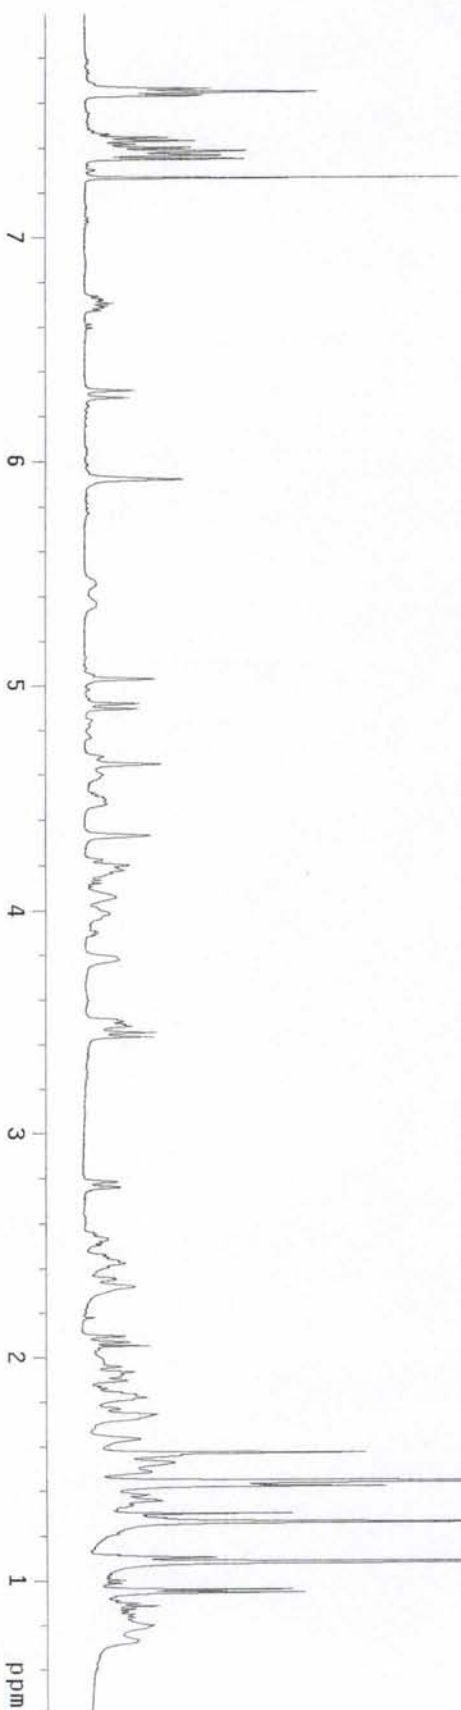

$^1H$  NMR spectrum for the mixture of compound **14** and **15** (**14** : **15** > 10 : 1)

Univ of Minnesota, VI  
 Pulse Sequence: s2pul

Date: Mar. 1, 2002

Solvent: CDCl<sub>3</sub>  
 Starting Time: 11:40:32  
 Completion Time: 11:42:29  
 Total acq. time 1 minutes

UNITplus-500 "v1500"

Ambient temperature

PULSE SEQUENCE  
 Relax. delay 1.500 sec  
 Pulse 90.0 degrees  
 Acq. time 1.892 sec  
 Width 8000.0 Hz  
 32 repetitions  
 OBSERVE H1 489.8671219 MHz  
 DATA PROCESSING  
 Line broadening 0.1 Hz  
 FT size 32768

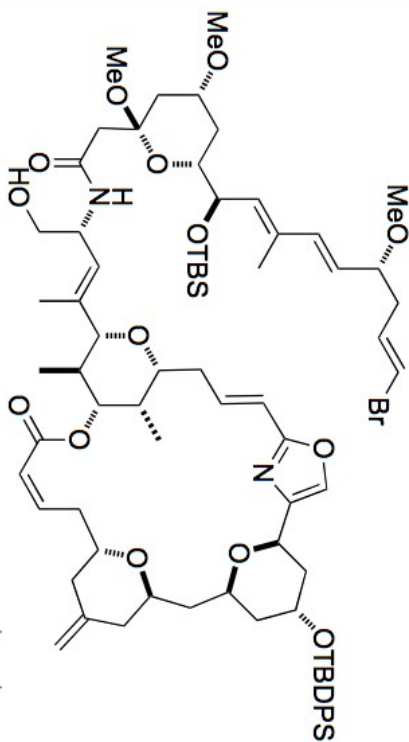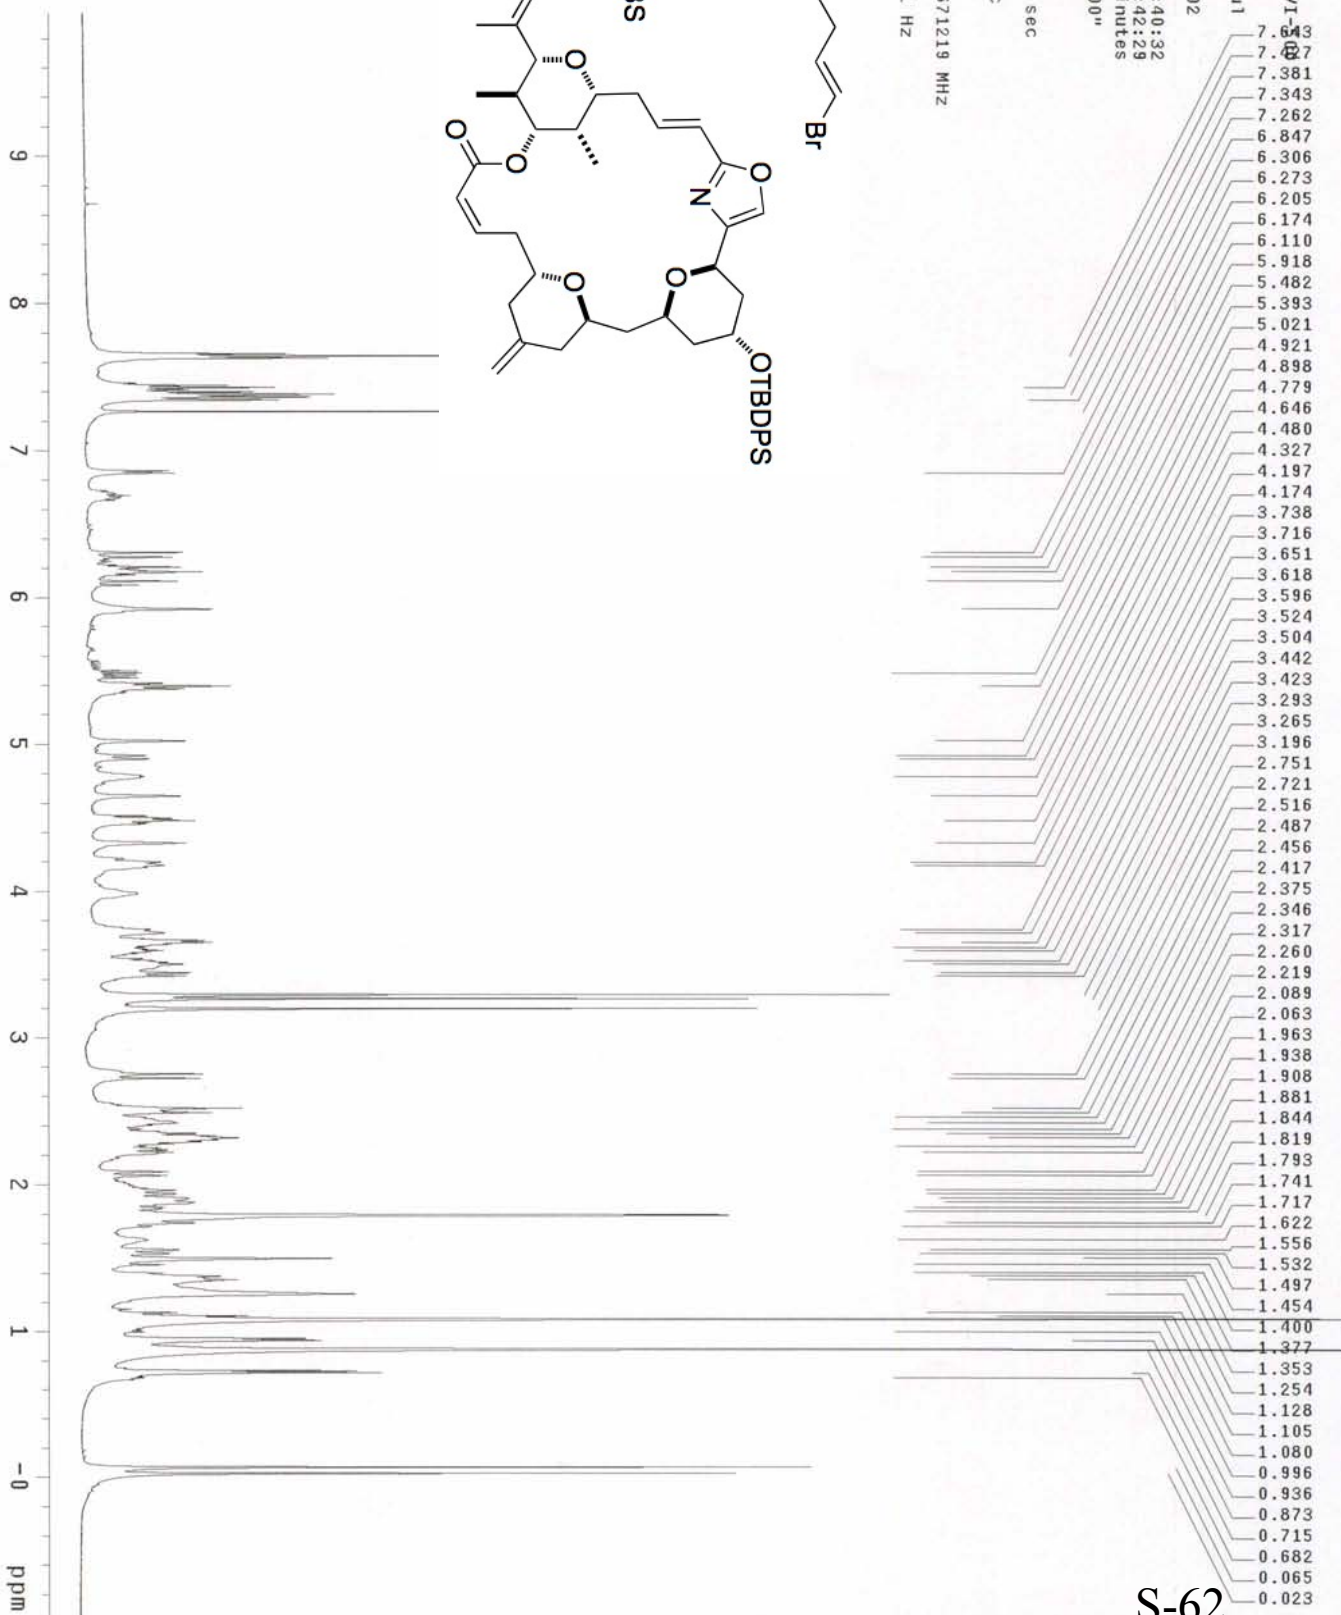

<sup>1</sup>H NMR spectrum for compound 26

Pulse Sequence: s2pu1

Date: Mar. 22, 2002  
 Solvent: CDCl<sub>3</sub>  
 Starting Time: 18:42:02  
 Completion Time: 18:42:24  
 Total acq. time 1 minute

UNITplus-500 "v1500"  
 Ambient temperature

PULSE SEQUENCE

Relax. delay 1.500 sec  
 Pulse 90.0 degrees  
 Acq. time 1.892 sec  
 Width 8000.0 Hz

4 repetitions  
 OBSERVE H1 499.8671219 MHz  
 DATA PROCESSING  
 Line broadening 0.1 Hz  
 Ft size 32768

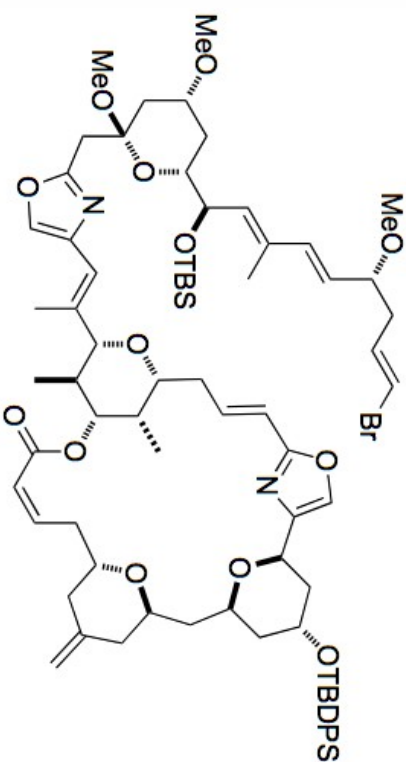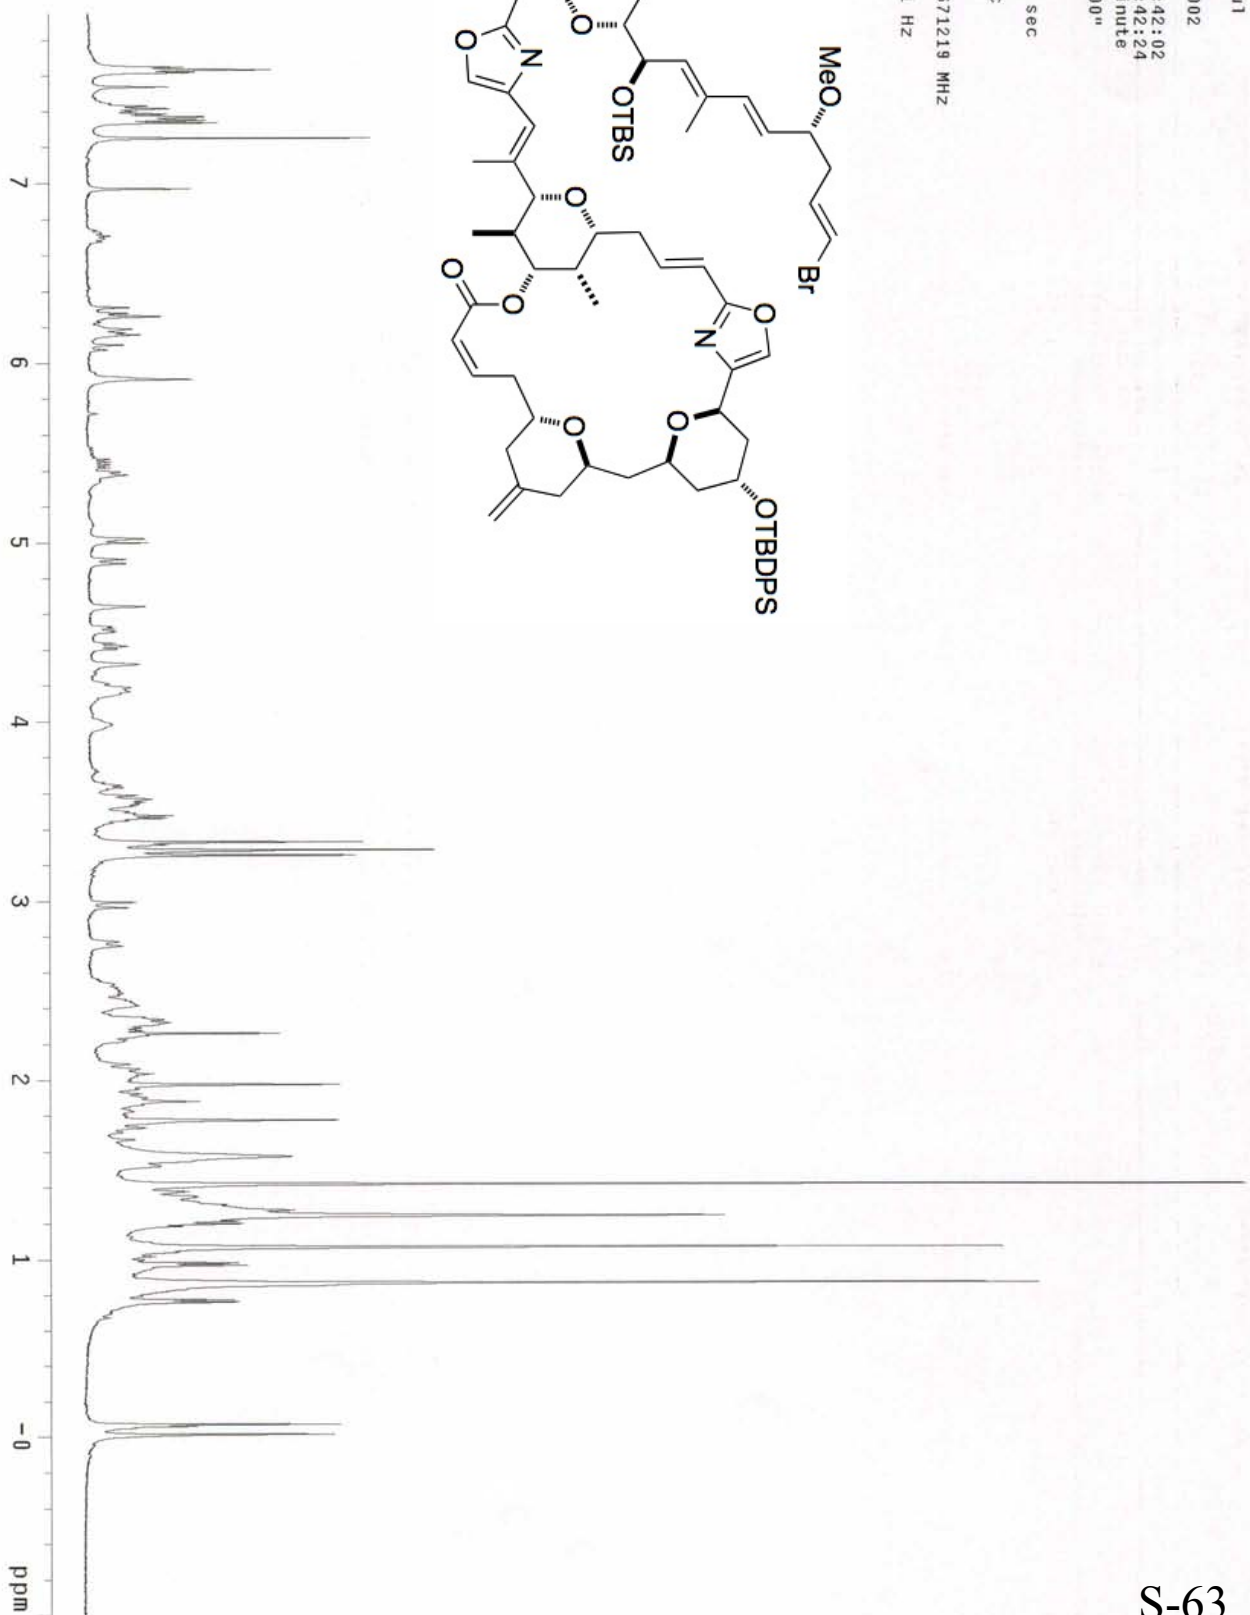

<sup>1</sup>H NMR spectrum for compound 27

University of Minnesota  
Department of Chemistry  
VAC-300

Pulse Sequence: s2pu1

Spin rate: 20  
Date: Mar. 22, 2002

Solvent: CDCl<sub>3</sub>

Starting time: 19:14:07

Completion time: 15:26:40

Total acq. time 20.2 hours

UNITplus-300 "vxf300"

Ambient temperature

PULSE SEQUENCE

Relax. delay 0.100 sec

Pulse 67.5 degrees

Acq. time 0.801 sec

Width 18867.9 Hz

25936 repetitions

OBSERVE C13, 75.3995910 MHz

DECOUPLE H1, 299.8604072 MHz

Power 38 dB

on during acquisition

off during delay

WALTZ-16 modulated

DATA PROCESSING

Line broadening 1.5 Hz

FT size 65536

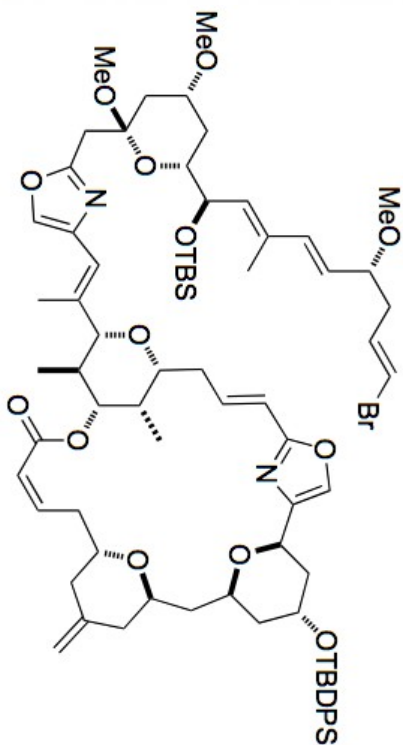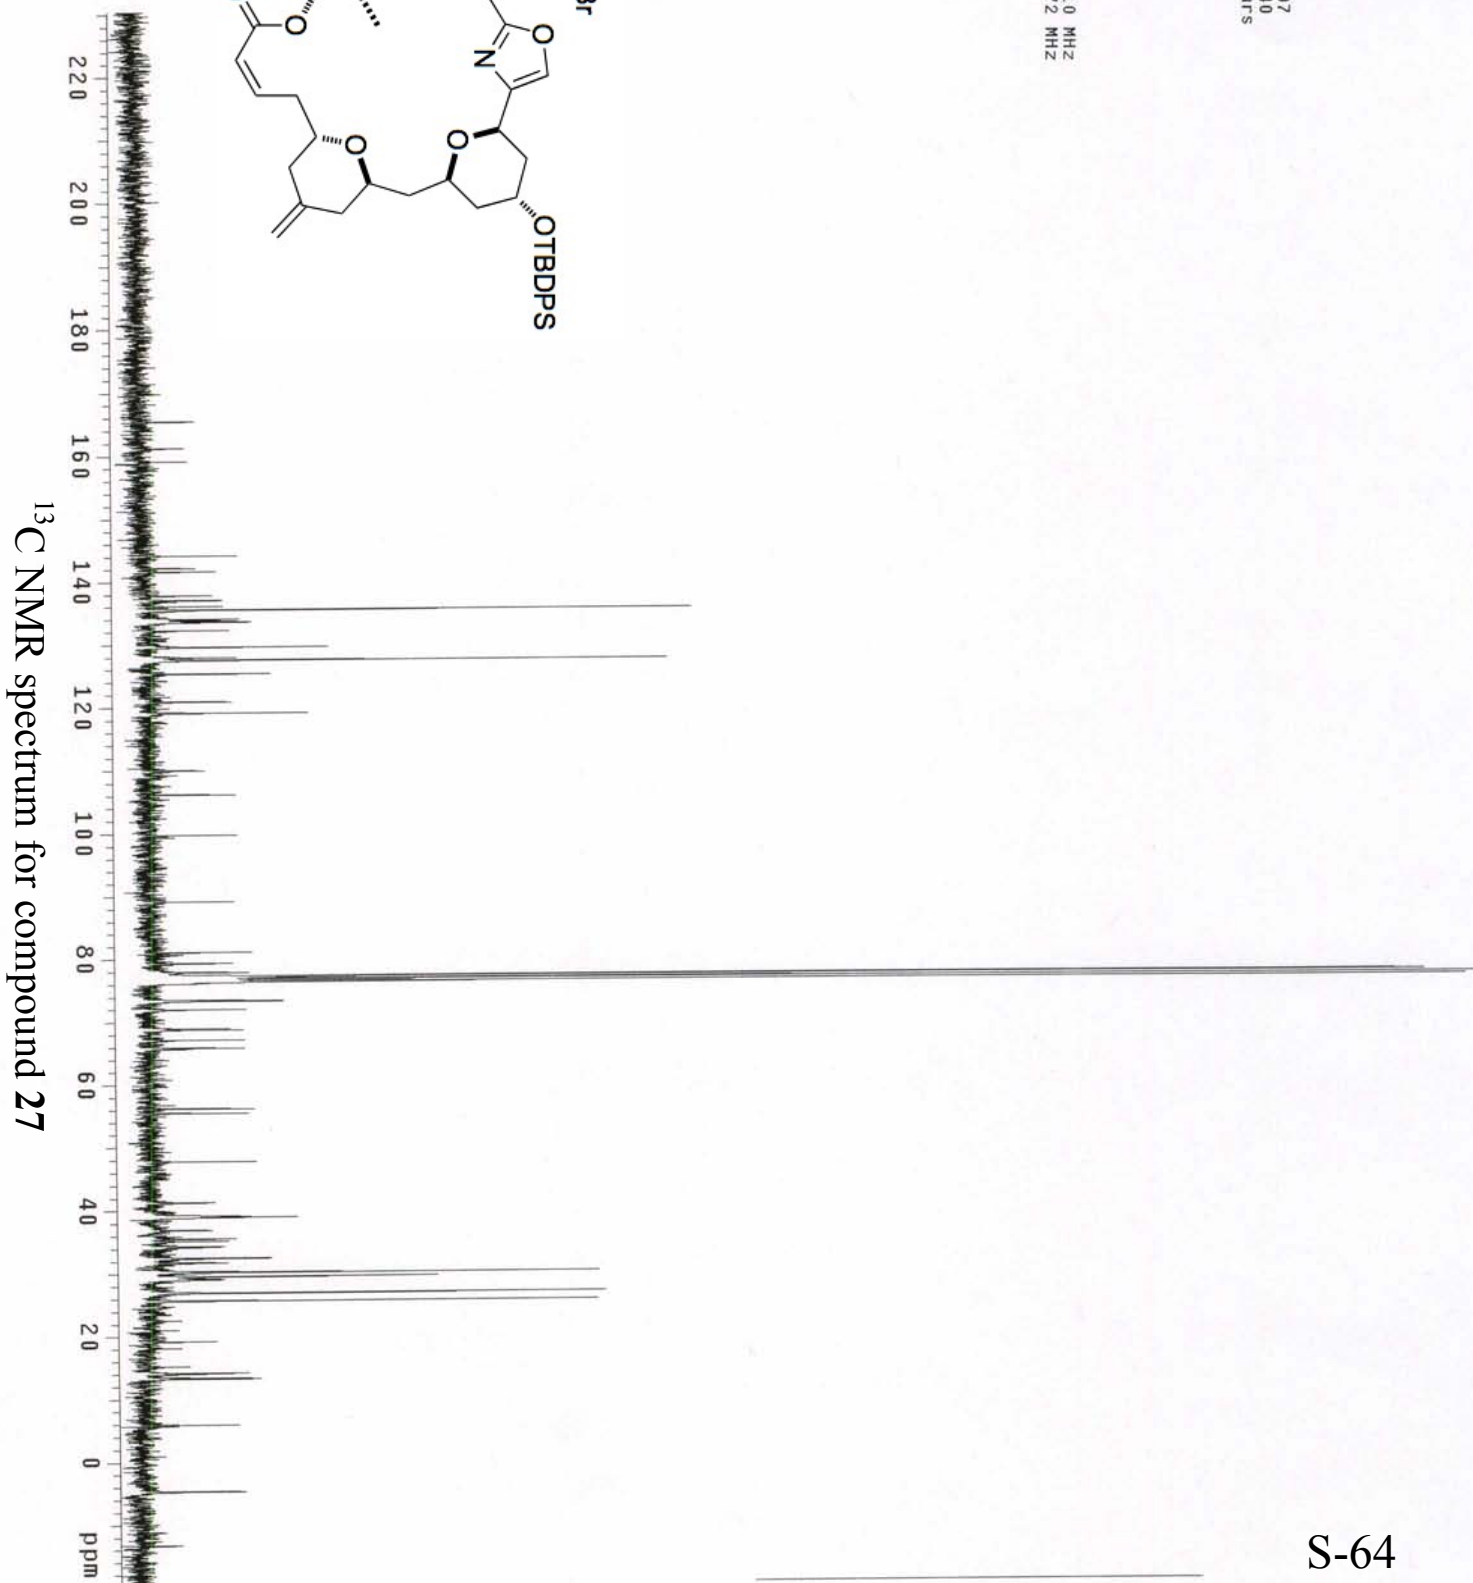

16.46. C29. Amide

Univ of Minnesota, VI-500

Pulse Sequence: s2pu1

Date: Mar. 18, 2002  
Solvent: CDCl<sub>3</sub>  
Starting Time: 17:32:46  
Completion Time: 17:36:31  
Total acq. time 3 minutes

UNITVplus-500 "v1500"  
Ambient temperature

PULSE SEQUENCE  
Relax. delay 1.500 sec  
Pulse 90.0 degrees  
Acq. time 1.892 sec  
Width 8000.0 Hz  
64 repetitions  
OBSERVE H1: 499.8671219 MHz  
DATA PROCESSING  
Line broadening 0.1 Hz  
FT size 32768

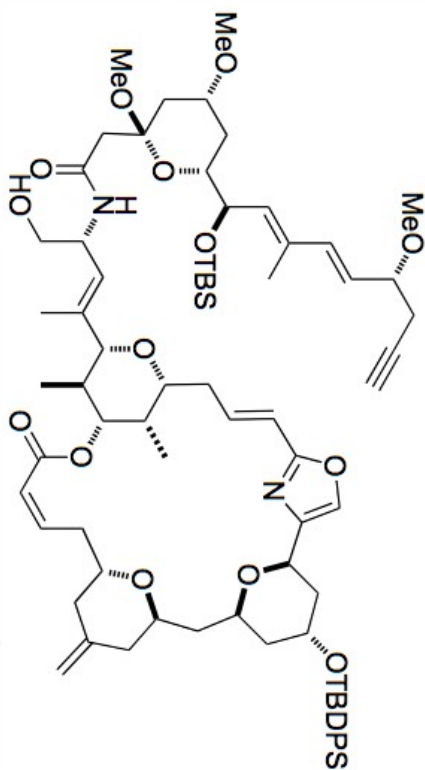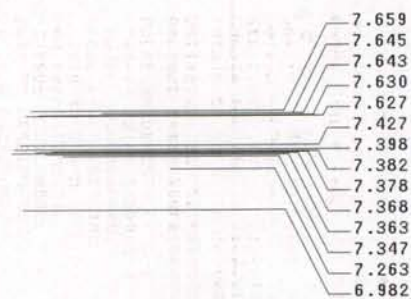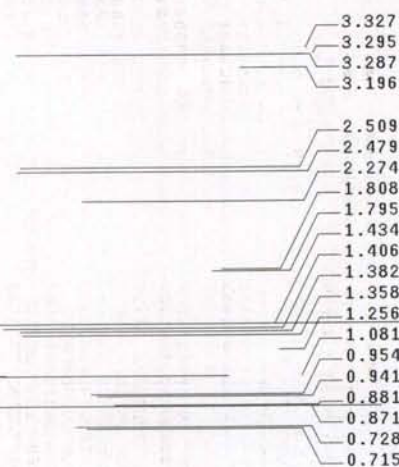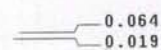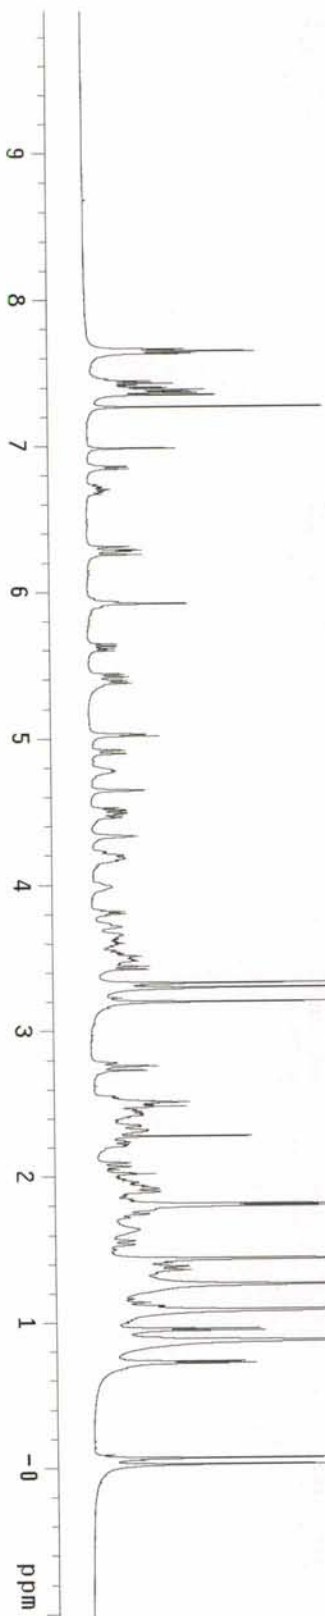

<sup>1</sup>H NMR spectrum for compound 32

University of Minnesota  
Department of Chemistry  
VAC-300

Pulse Sequence: s2pul  
Spin rate: 20  
Date: Mar. 18, 2002  
Solvent: CDCl3  
Starting Time: 17:54:26  
Total acq. time 14.6 hours  
UNITYplus-300 "vvr300"  
Ambient temperature  
PULSE SEQUENCE  
Relax. delay 0.100 sec  
Pulse 67.5 degrees  
Acq. time 0.801 sec  
Width 18867.9 Hz  
18784 repetitions  
OBSERVE C13, 75.395910 MHz  
DECOUPLE H1, 299.8604072 MHz  
Power 38 dB  
on during acquisition  
off during delay  
WALTZ-16 modulated  
DATA PROCESSING  
Line broadening 1.5 Hz  
FT size 65536

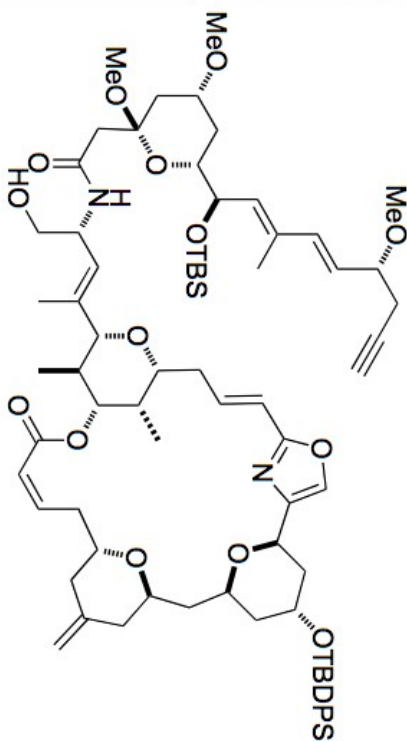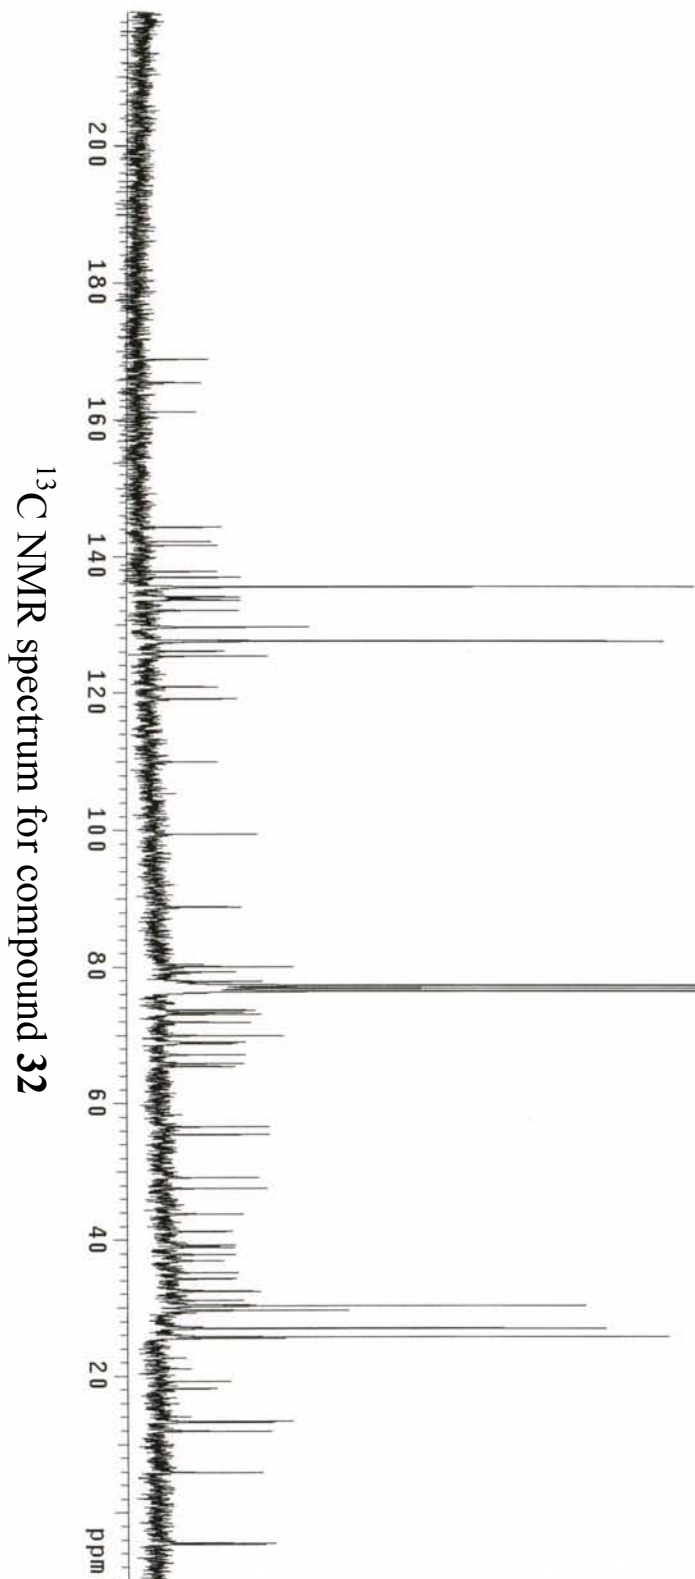

Pulse Sequence: s2pul  
 User: cfotmh  
 Date: Jul 5, 2000  
 Solvent: CDCl3  
 File: Z-oxazolepure  
 Starting Time: 14:31:54  
 Completion Time: 14:40:57  
 Total acq. time 8 minutes  
 UNITplus-500 "spectrum"  
 Ambient temperature  
 PULSE SEQUENCE  
 Relax. delay 1.500 sec  
 Pulse 90.0 degrees  
 Acq. time 1.892 sec  
 Width 8000.0 Hz  
 144 repetitions  
 OBSERVE H1 499.8671218 MHz  
 DATA PROCESSING  
 FT size 32768

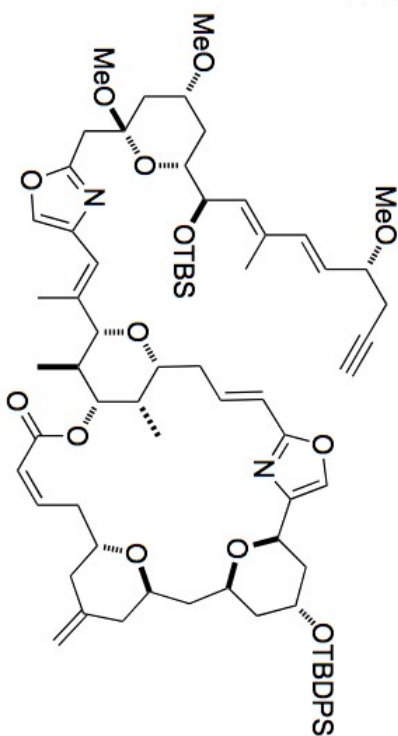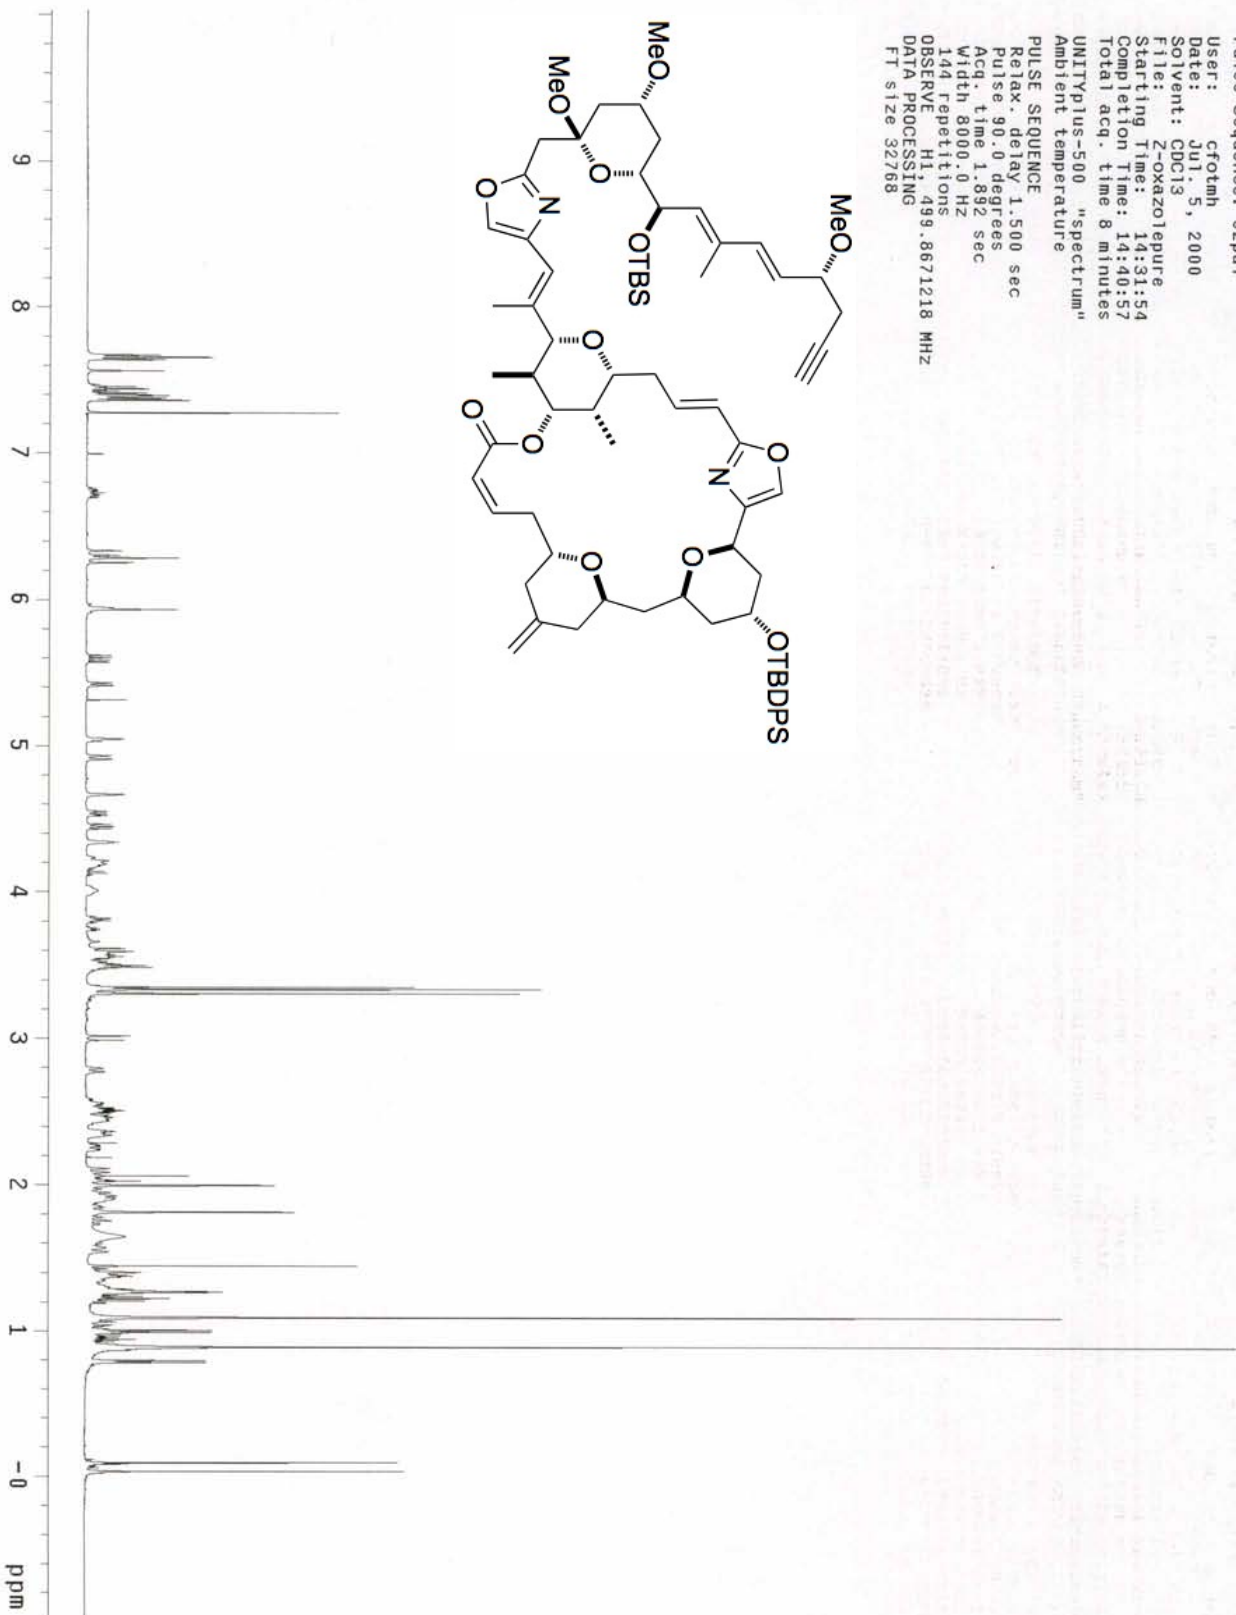

<sup>1</sup>H NMR spectrum for compound 33

Univ of Minnesota, VI-500

Pulse Sequence: s2pul

User: 1-14-87

Date: Jul 5, 2000

Solvent: CDCl<sub>3</sub>

File: Z-oxazoleCarbon

Starting Time: 20:19:56

Completion Time: 08:56:27

Total acq. time 12.6 hours

UNITYplus-500 "spectrum"

Ambient temperature

PULSE SEQUENCE

Relax. delay 0.100 sec

Pulse 67.5 degrees

Acq. time 0.960 sec

Width 32989.7 Hz

15312 repetitions

OBSERVE C13, 125.6916844 MHz

DECOUPLE H1, 499.8696212 MHz

Power 36 dB

on during acquisition

off during delay

WALTZ-16 modulated

DATA PROCESSING

FT size 65536

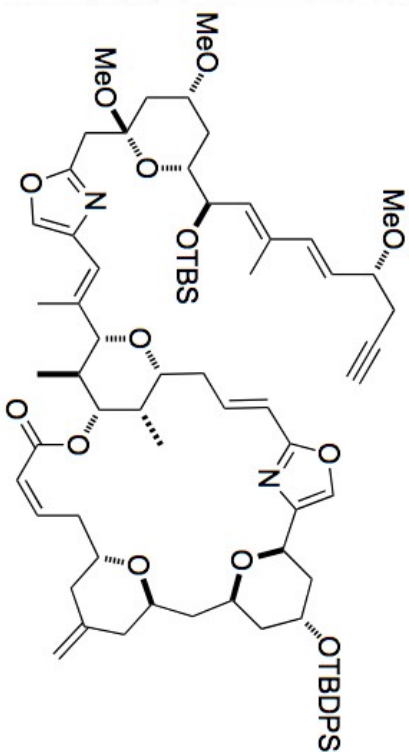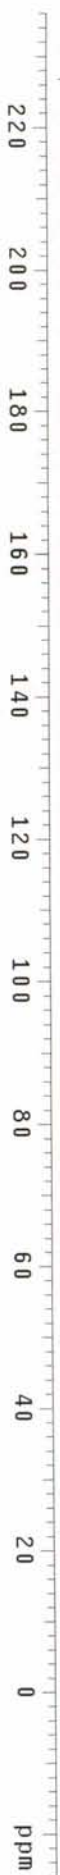

<sup>13</sup>C NMR spectrum for compound 33

Univ of Minnesota, VI-580  
 Pulse Sequence: s2pu1  
 Date: Aug. 4, 2002  
 Solvent: CDCl3  
 Starting Time: 12:21:04  
 Completion Time: 12:21:26  
 Total acq. time 1 minute  
 UNITYplus-500 "v1500"  
 Ambient temperature  
 PULSE SEQUENCE  
 Relax. delay 1.500 sec  
 Pulse 90.0 degrees  
 Acq. time 1.892 sec  
 Width 8000.0 Hz  
 4 repetitions  
 OBSERVE H1, 499.8671219 MHz  
 DATA PROCESSING  
 Line broadening 0.1 Hz  
 FI size 32768

7.654  
 7.636  
 7.450  
 7.436  
 7.422  
 7.401  
 7.387  
 7.375  
 7.360  
 7.271  
 7.269  
 6.854  
 6.838  
 6.282  
 6.271  
 6.251  
 4.849  
 4.781  
 4.322  
 3.457  
 3.437  
 3.324  
 3.289  
 3.222  
 3.193  
 2.712  
 2.526  
 2.518  
 2.512  
 2.502  
 2.496  
 2.491  
 2.483  
 2.477  
 2.286  
 2.031  
 2.027  
 1.956  
 1.947  
 1.929  
 1.921  
 1.818  
 1.804  
 1.789  
 1.572  
 1.427  
 1.259  
 1.132  
 1.118  
 1.104  
 0.947  
 0.934  
 0.880  
 0.870  
 0.719  
 0.706  
 0.084  
 0.074  
 0.063  
 0.048  
 0.019

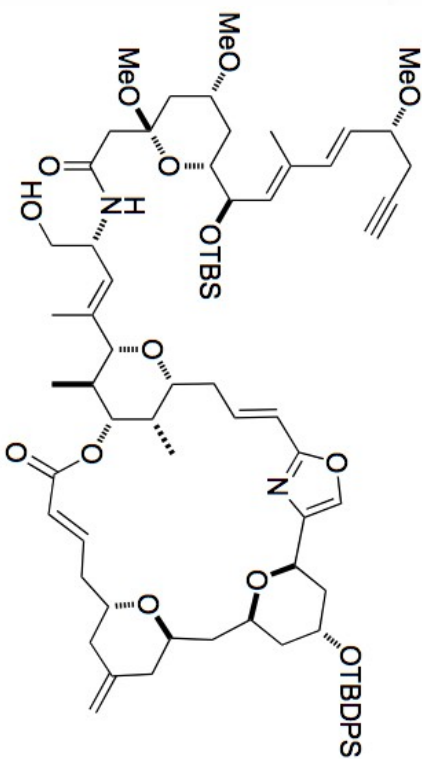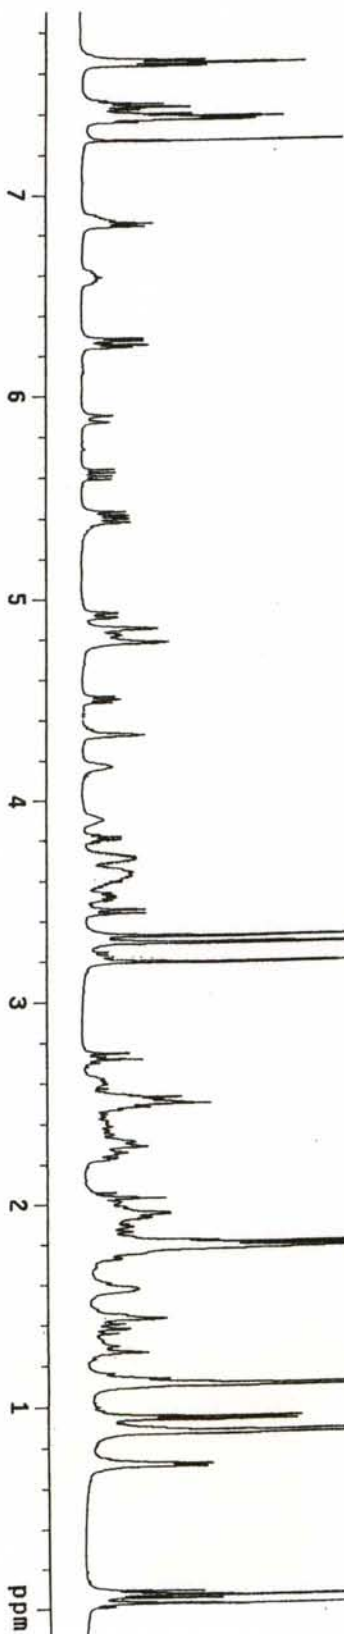

<sup>1</sup>H NMR spectrum for compound 38

File 254161

University of Minnesota  
Department of Chemistry  
VAC-300

Pulse Sequence: s2pul1  
Spin rate: 20  
Date: Aug. 4, 2002  
Solvent: CDCl3  
Starting Time: 15:52:06  
Total acq. time 17.7 hour  
UNITplus-300 "vxr300"  
Ambient temperature  
PULSE SEQUENCE  
Relax. delay 0.100 sec  
Pulse 67.5 degrees  
Acq. time 0.801 sec  
Width 18867.9 Hz  
22784 repetitions  
OBSERVE C13, 75.395910 MHz  
DECUPLE H1, 299.8604072 MHz  
Power 38 dB  
on during acquisition  
off during delay  
WALTZ-16 modulated  
DATA PROCESSING  
Line broadening 1.5 Hz  
FT size 65536

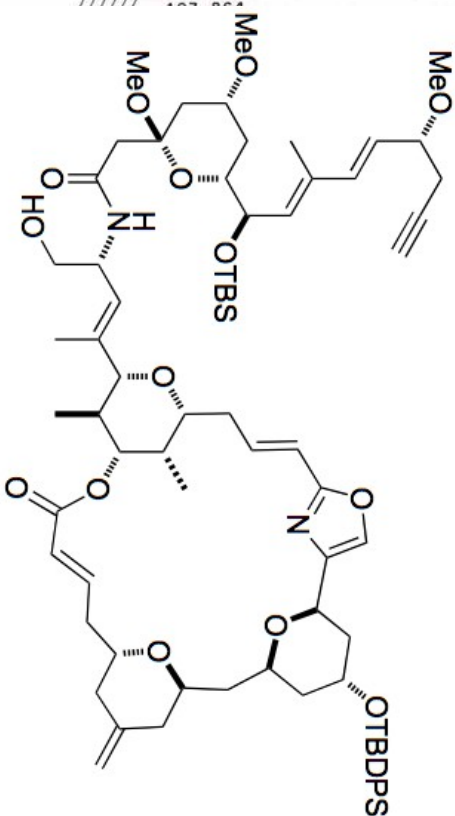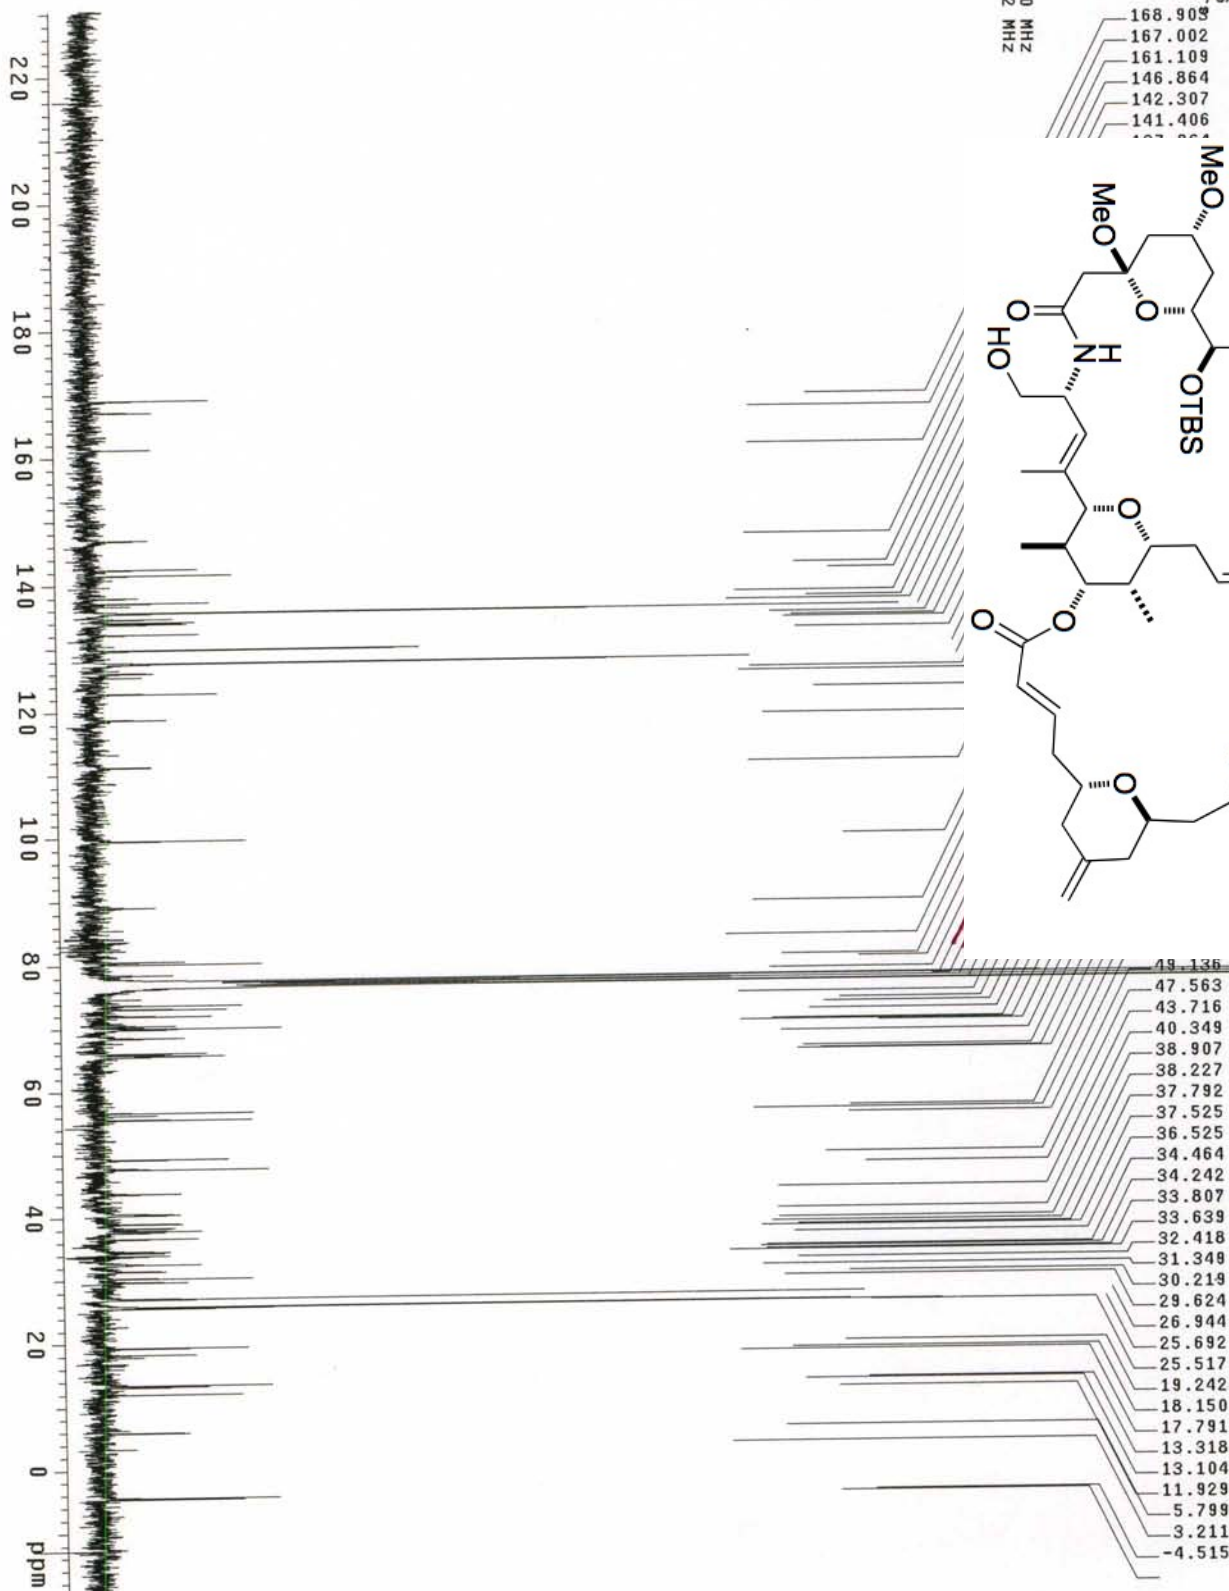

$^{13}\text{C}$  NMR spectrum for compound 38



University of Minnesota  
Department of Chemistry  
VAC-300

Pulse Sequence: szpul

Spin rate: 20

Date: Aug. 22, 2002

Solvent: CDCl<sub>3</sub>

Starting Time: 23:34:50

Total acq. time 10.1 hours

UNITYplus-300 "vxr300"

Ambient temperature

PULSE SEQUENCE

Relax. delay 0.100 sec

Pulse 67.5 degrees

Acq. time 0.801 sec

Width 18867.9 Hz

12932 repetitions

OBSERVE C13, 75.3995910 MHz

DECOUPLE H1, 299.8604072 MHz

Power 38 dB

on during acquisition

off during delay

WALTZ-16 modulated

DATA PROCESSING

Line broadening 1.5 Hz

FT size 65536

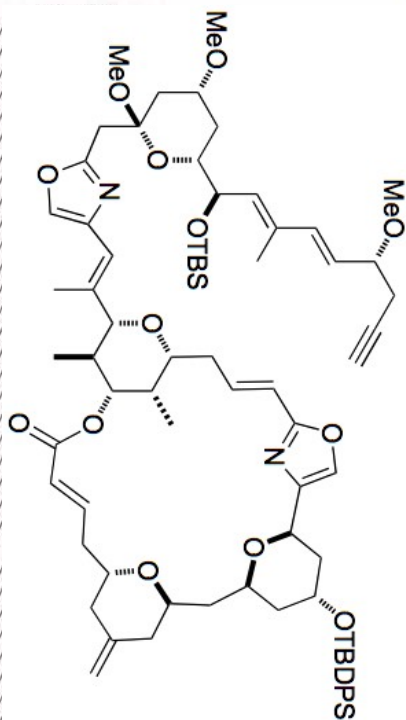

68C

S-72

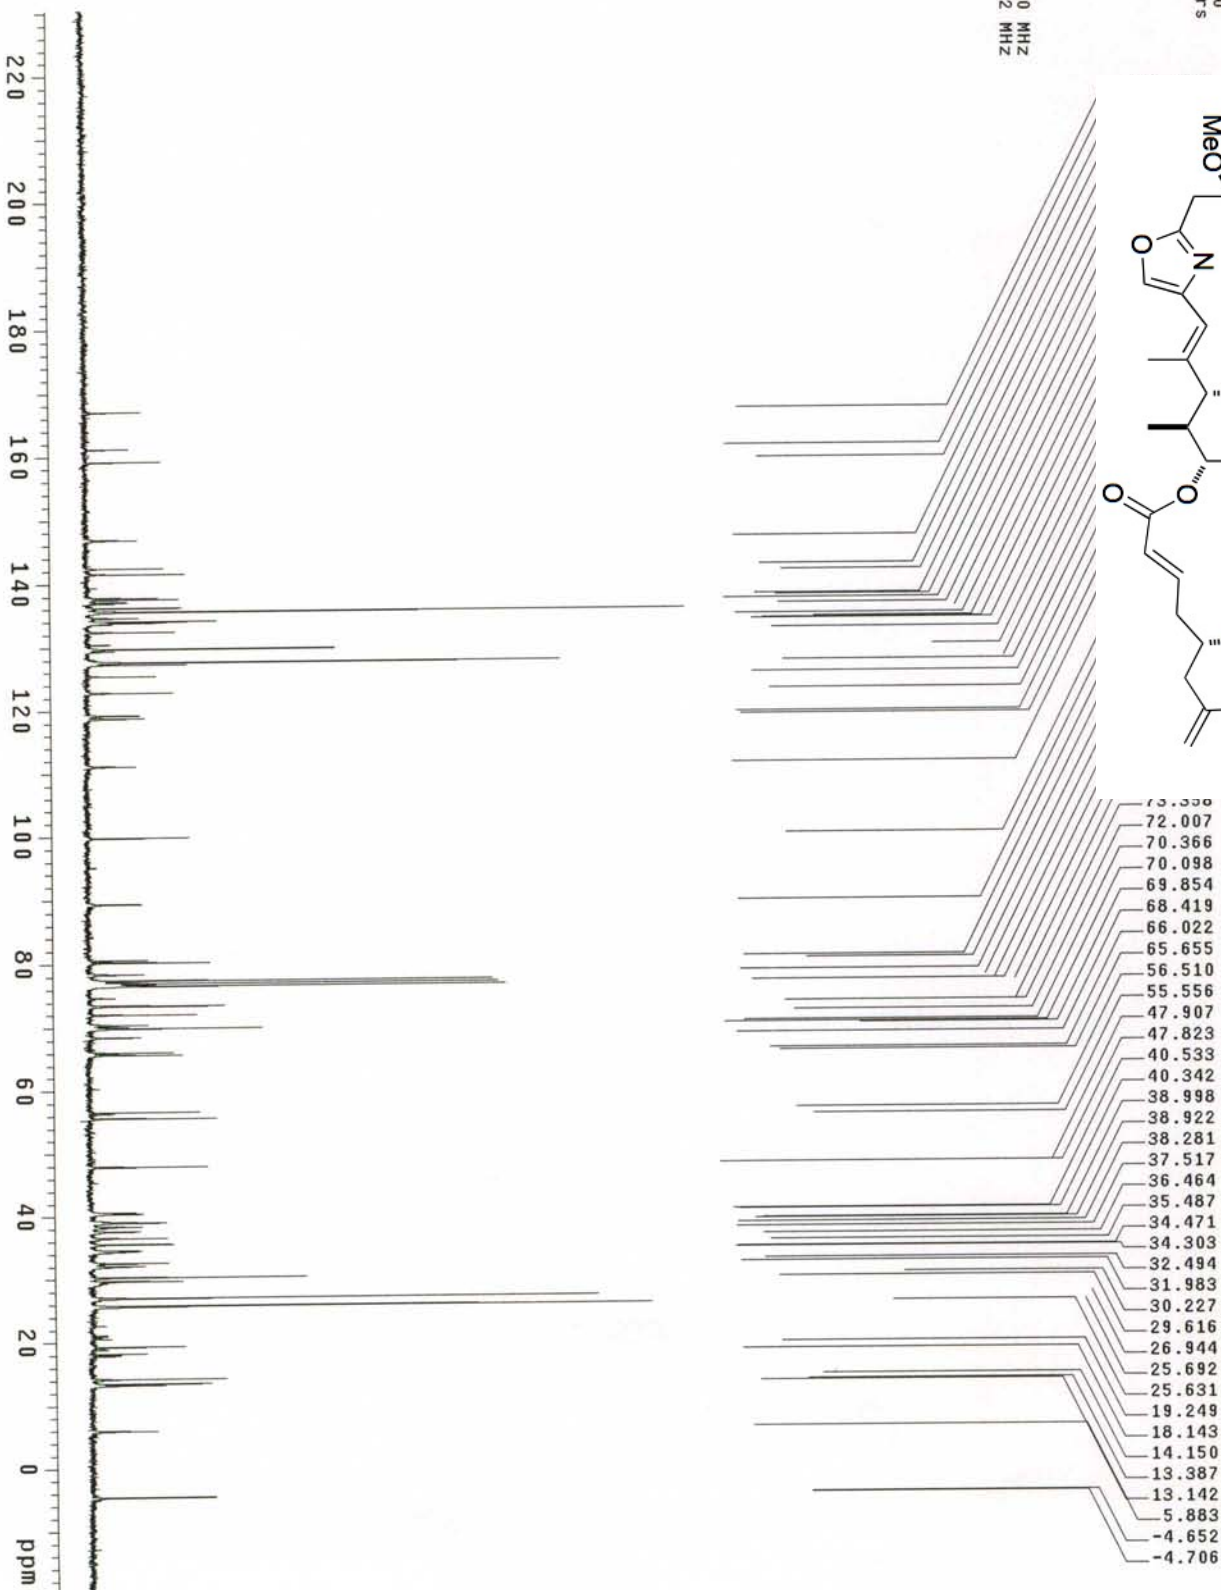

<sup>13</sup>C NMR spectrum for compound 39

Univ of Minnesota, VI-

Pulse Sequence: szpul

Spin rate: 13

Date: Jul 12, 2000

Solvent: CDCl<sub>3</sub>

Starting Time: 12:40

Completion Time: 12:44

Total acq. time 3 min

UNITYplus-500 "v1500"

Ambient temperature

PULSE SEQUENCE

Relax. delay 1.500 se

Pulse 90.0 degrees

Acq. time 1.892 sec

Width 8000.0 Hz

64 repetitions

OBSERVE HL 499.8671

DATA PROCESSING

Line broadening 0.1 H

FT size 32768

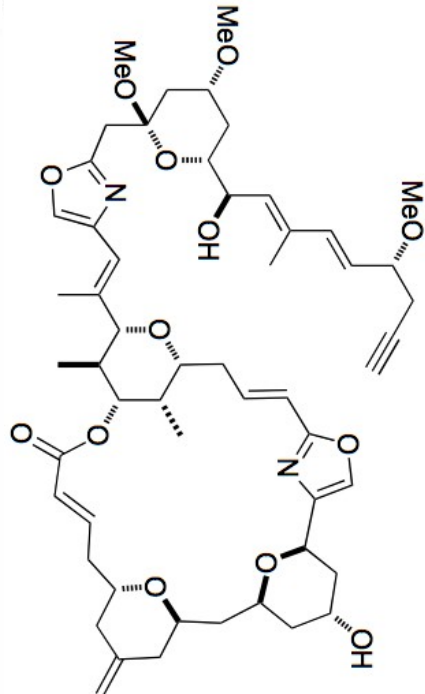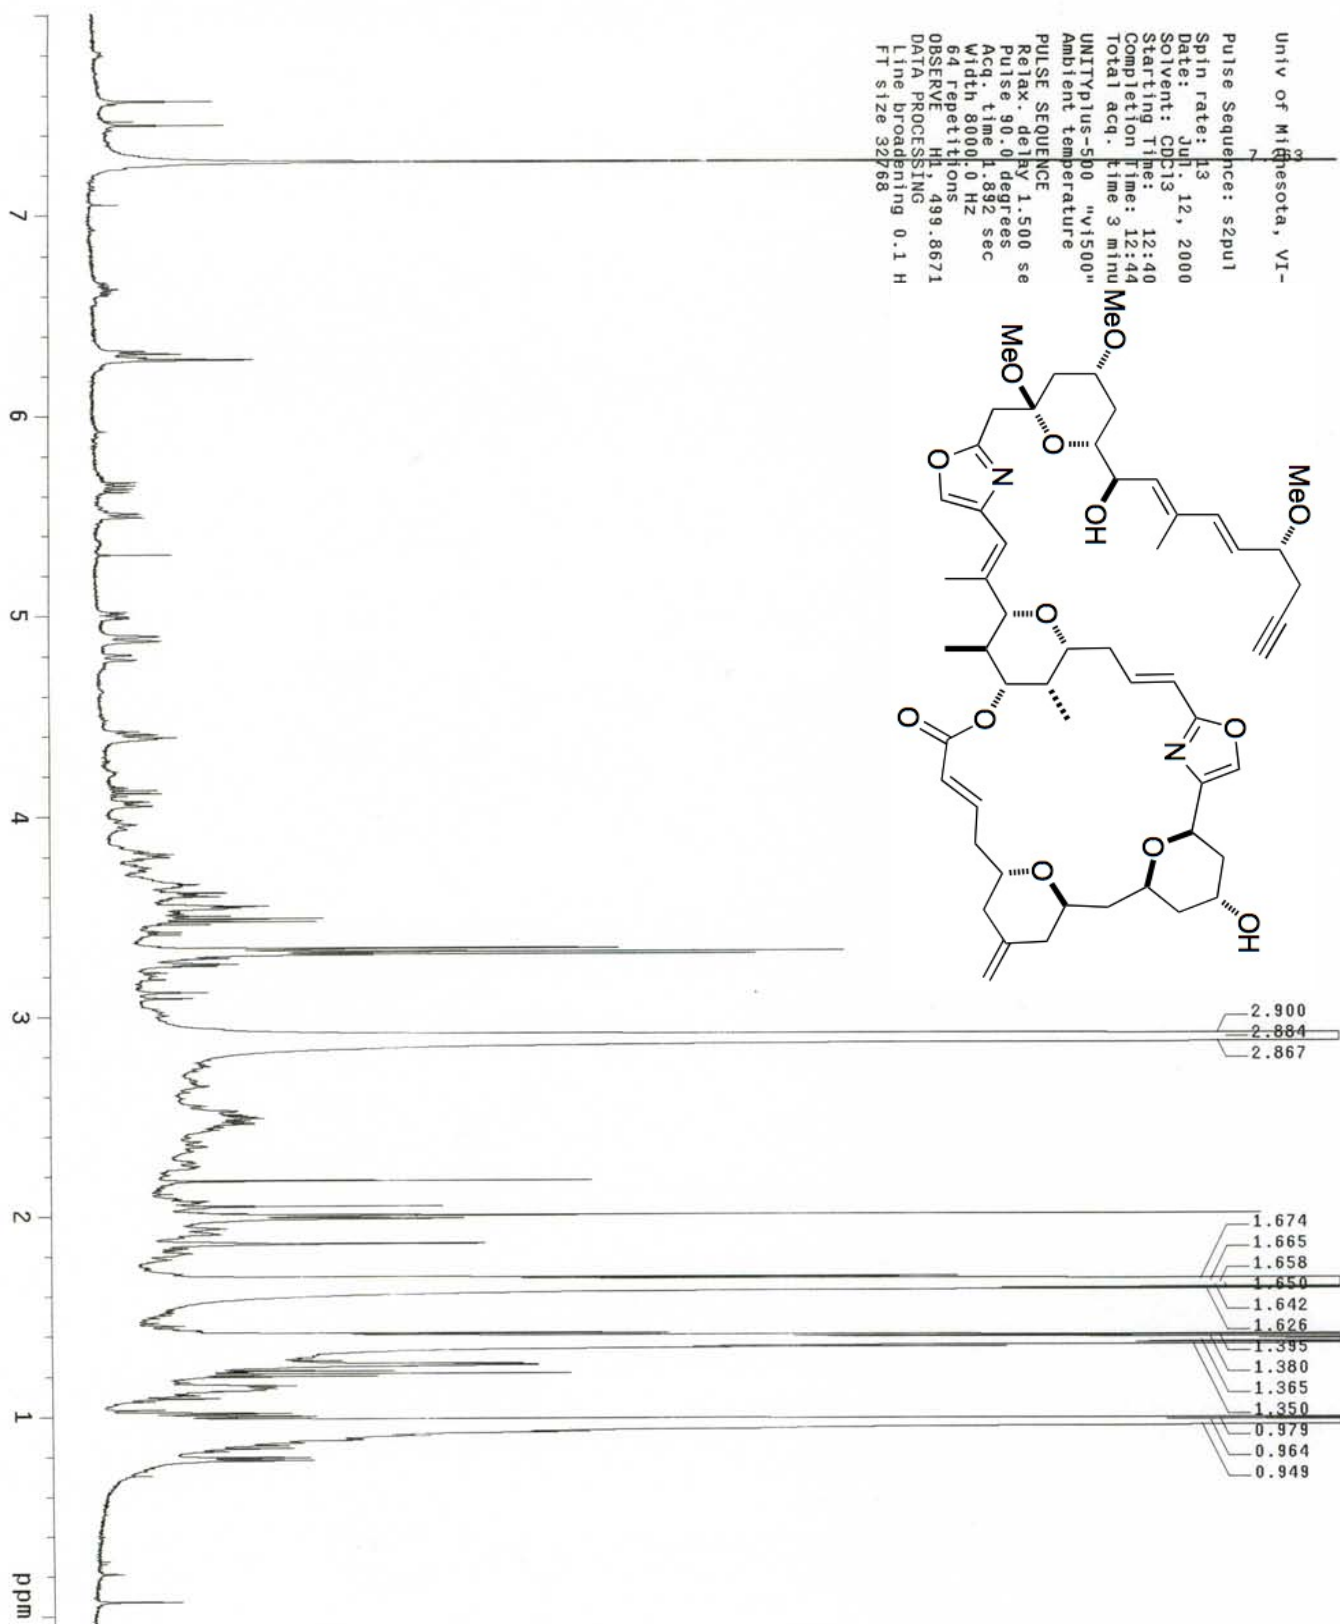

<sup>1</sup>H NMR spectrum for compound 40

2E-Di

University of Minnesota  
Department of Chemistry  
VAC-300

Pulse Sequence: szpu1

Spin rate: 20

Date: Aug. 24, 2002

Solvent: CDCl<sub>3</sub>

Starting time: 22:42:27

Total acq. time 12.6 hours

UNITYplus-300 "vxt300"

Ambient temperature

PULSE SEQUENCE

Relax. delay 0.100 sec

Pulse 67.5 degrees

Acq. time 0.801 sec

Width 18867.9 Hz

16160 repetitions

OBSERVE C13, 75.395910 MHz

DECOUPLE H1, 299.8604072 MHz

Power 38 dB

on during acquisition

off during delay

WALTZ-16 modulated

DATA PROCESSING

Line broadening

FT size 65536

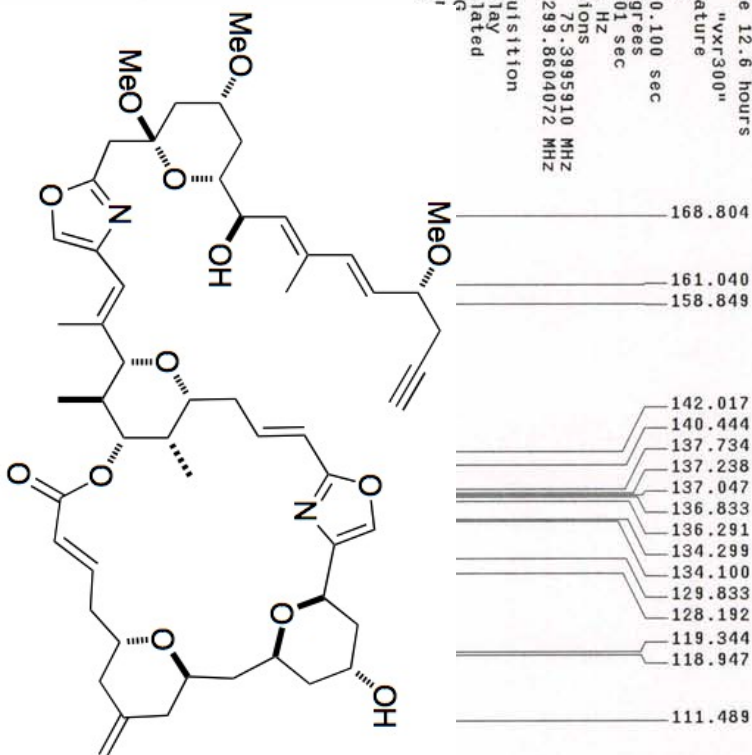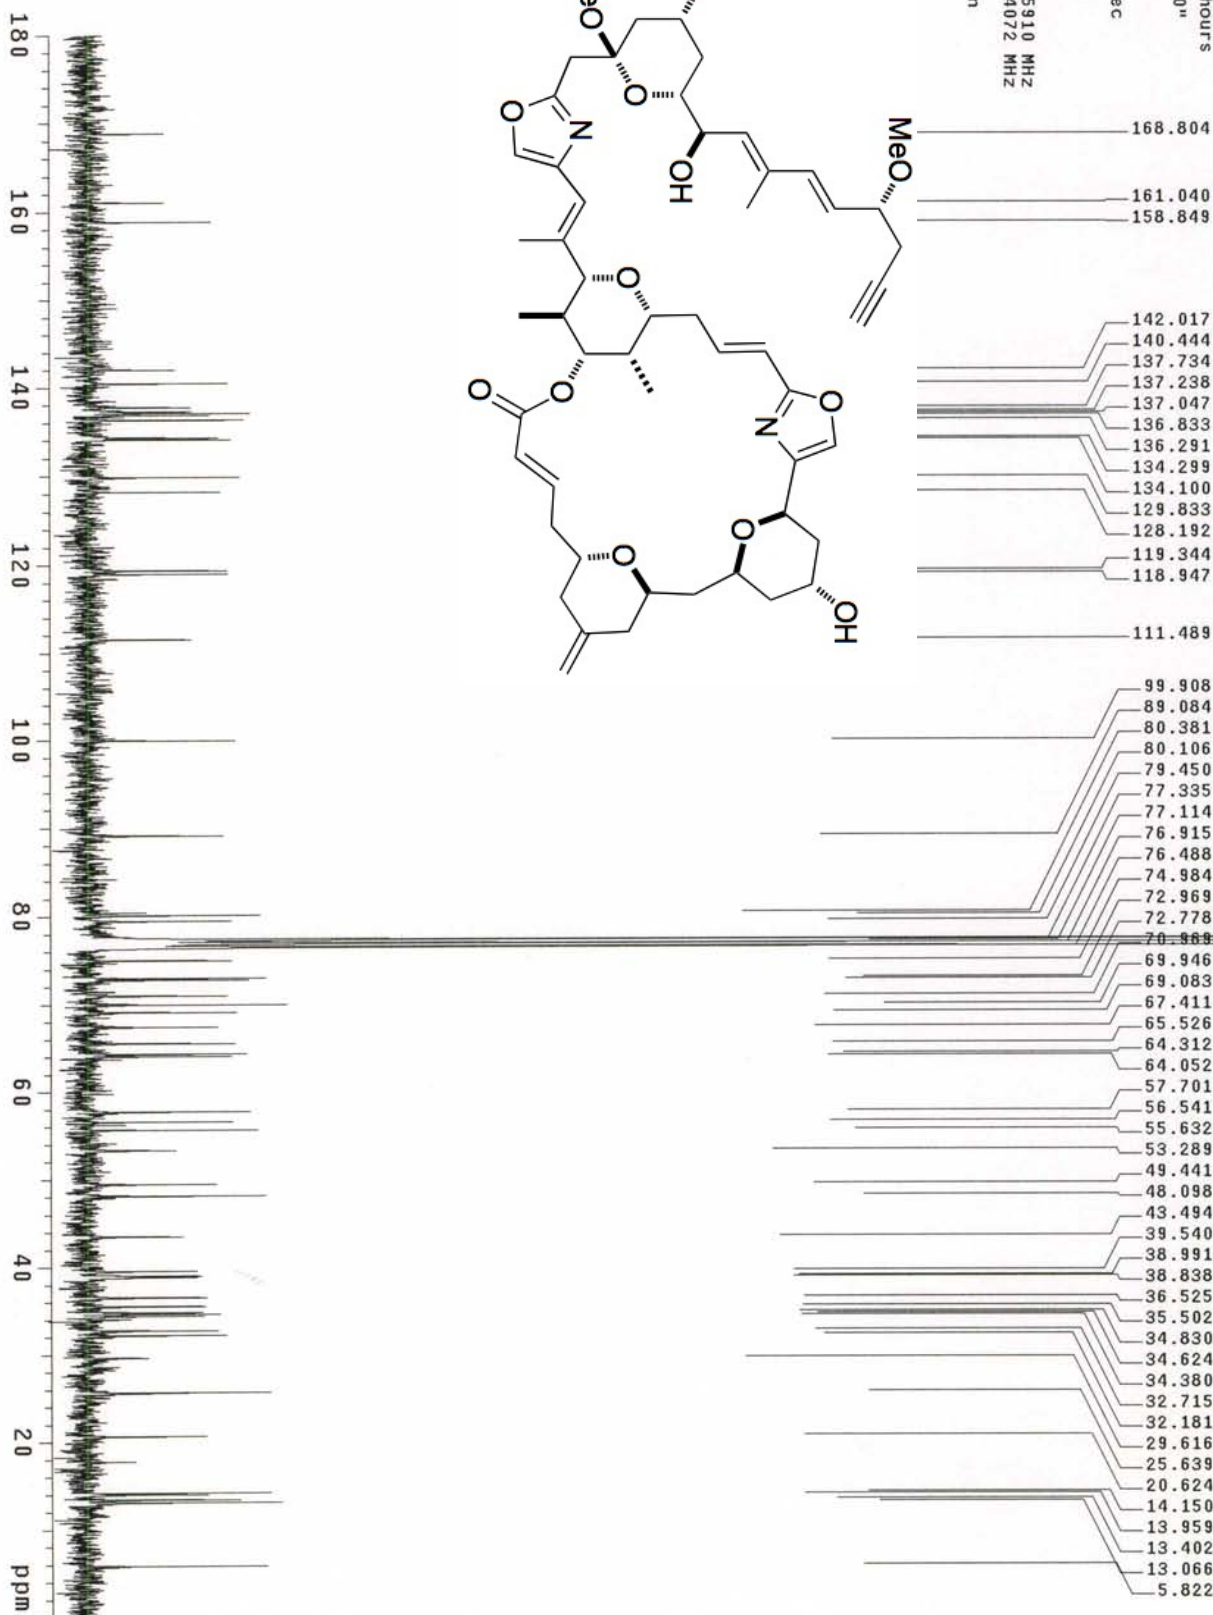

<sup>13</sup>C NMR spectrum for compound 40

Univ of Minnesota, VI

5.03

7.503

7.268

6.624

6.604

6.327

6.293

6.276

6.257

5.633

5.601

5.385

5.367

5.320

4.988

4.904

4.880

4.799

4.779

4.393

4.325

4.308

4.088

4.067

4.046

3.957

3.831

3.803

3.787

3.767

3.745

3.685

3.665

3.615

3.595

3.555

3.521

3.368

3.322

3.276

3.178

3.147

3.104

3.073

2.676

2.651

2.558

2.529

2.495

2.462

2.435

2.378

2.355

2.331

2.074

2.054

2.032

2.013

1.990

1.965

1.937

1.833

1.816

1.642

1.593

1.481

1.429

1.406

1.384

1.257

1.143

1.118

1.095

1.017

0.885

0.792

Pulse Sequence: s2pu1

User: cftmh

Date: Aug. 27, 2002

Solvent: CDCl3

File: 2E4546DBPA

Starting Time: 19:32:29

Completion Time: 19:42:05

Total acq. time 9 minutes

UNITYplus-500 "spectrum"

Ambient temperature

PULSE SEQUENCE

Relax. delay 1.500 sec

Pulse 90.0 degrees

Acq. time 1.892 sec

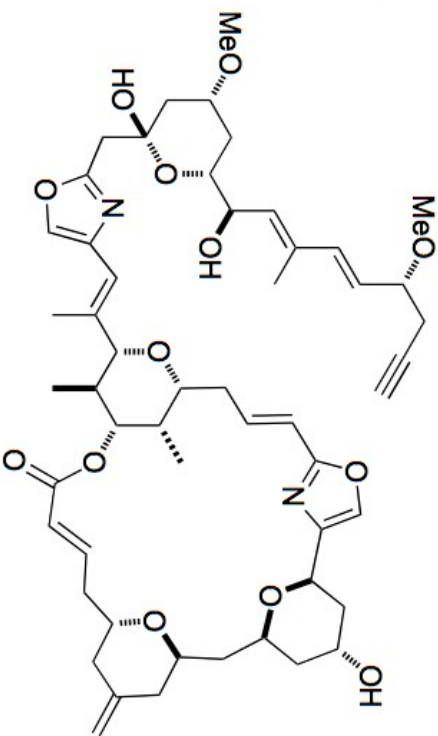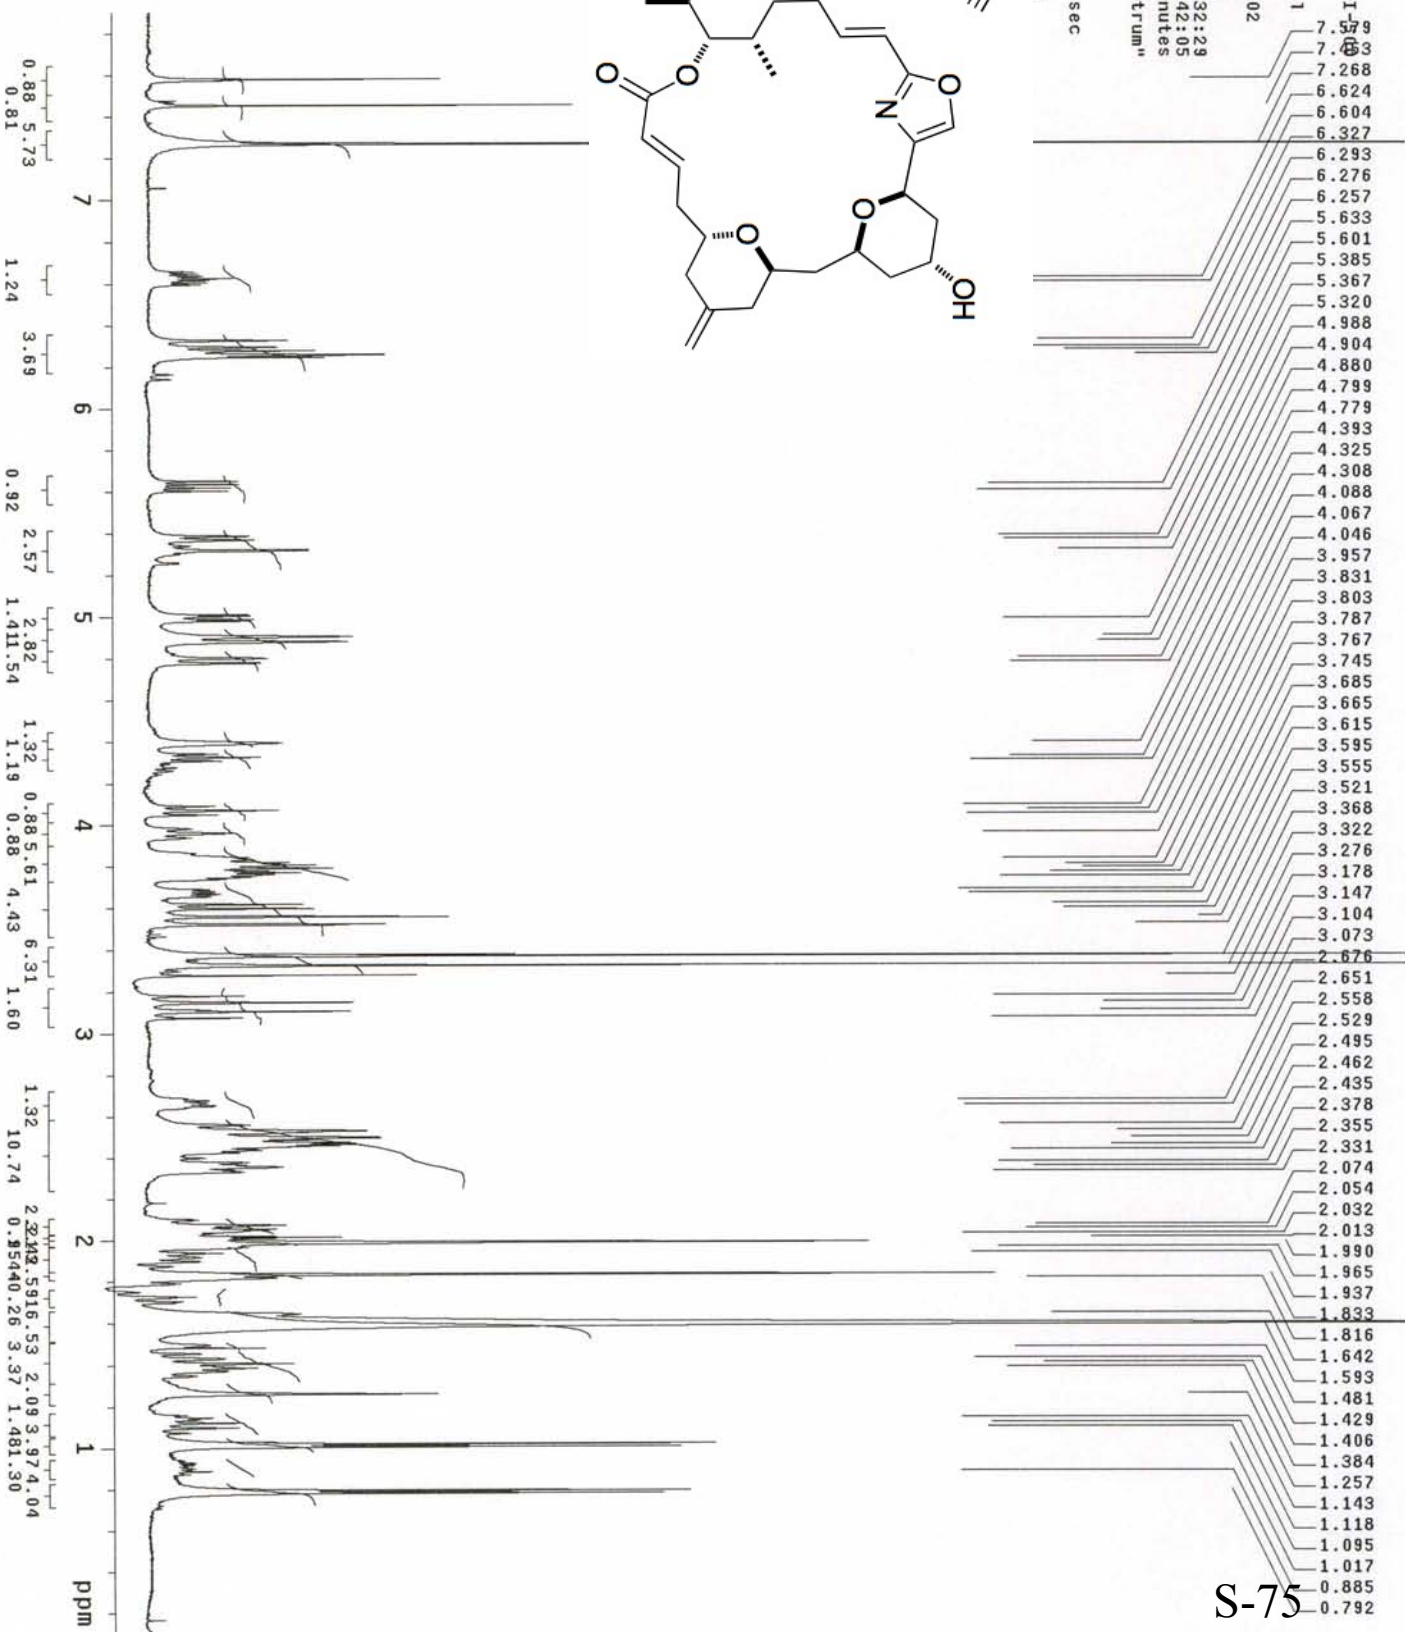

<sup>1</sup>H NMR spectrum for compound 41

9.

9.

27

11

10

115

50

5

1

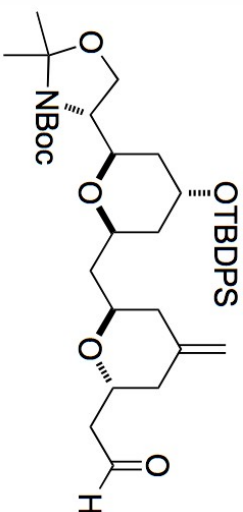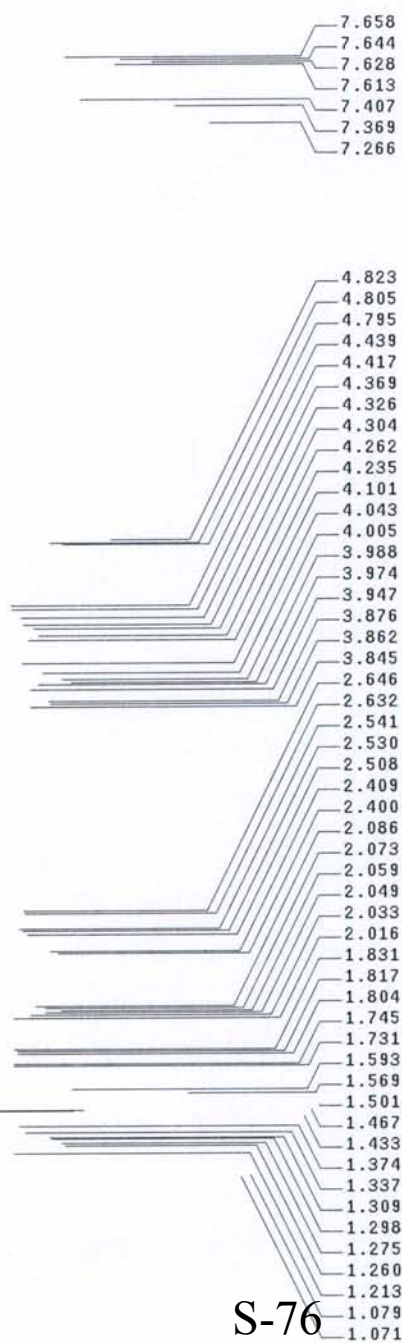

S-76

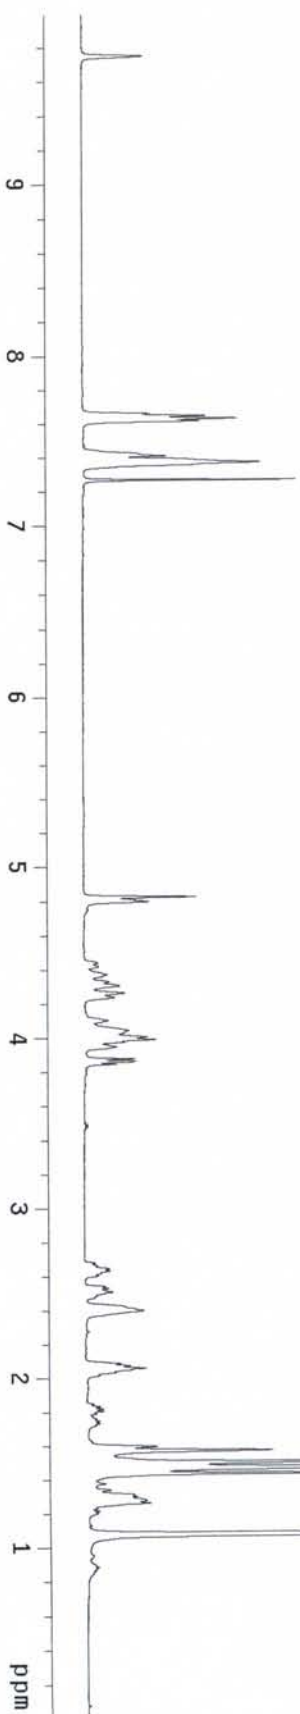

<sup>1</sup>H NMR spectrum for compound **52**

Univ of Minnesota, VI-500  
 Pulse Sequence: szpul  
 Date: Jul, 13, 2006  
 Solvent: cdcl3  
 File: BW-Photo-simuloxazole-C3-aldehyde-C  
 Starting Time: 11:37:12  
 Total acq. time 38 minutes  
 UNITYplus-500 "v1500"  
 Ambient temperature  
 PULSE SEQUENCE  
 Relax. delay 2.000 sec  
 Pulse 67.5 degrees  
 Acq. time 0.360 sec  
 Width 32989.7 Hz  
 480 repetitions  
 OBSERVE C13, 125.6916844 MHz  
 DECOUPLE H1, 499.8696213 MHz  
 Power 36 dB  
 on during acquisition  
 off during delay  
 WALTZ-16 modulated  
 DATA PROCESSING  
 Line broadening 1.0 Hz  
 FT size 65536

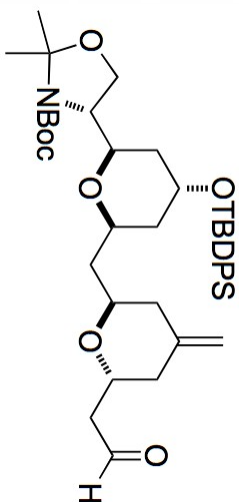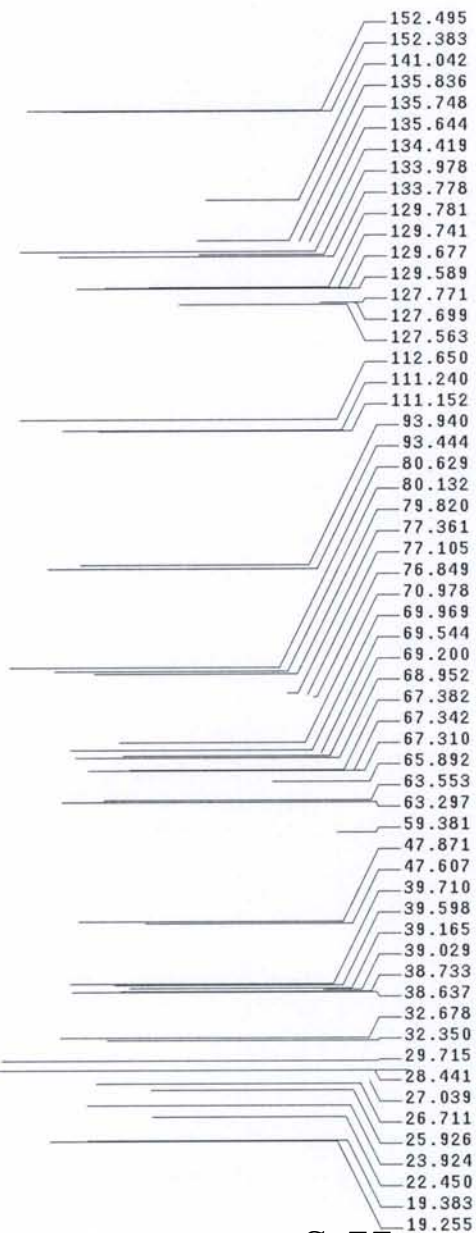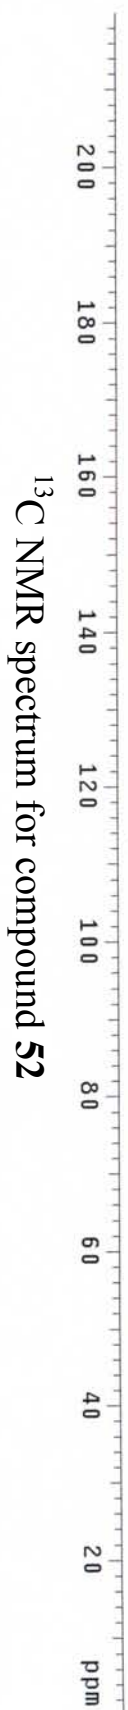

University of Minnesota, VXR-300

Pulse Sequence: s2pul

User: cfoamh

Date: Feb. 15, 2002

Solvent: CDCl3

File: tbncl6c30

Starting Time: 15:32:08

Completion Time: 15:33:28

Total acq. time 1 minute

UNITYplus-500 "Spectrum"

Ambient temperature

PULSE SEQUENCE

Relax. delay 1.500 sec

Pulse 90.0 degrees

Acq. time 2.000 sec

Width 599.7 Hz

16 repetitions

OBSERVE H1 299.8589067 MHz

DATA PROCESSING

FI size 131072

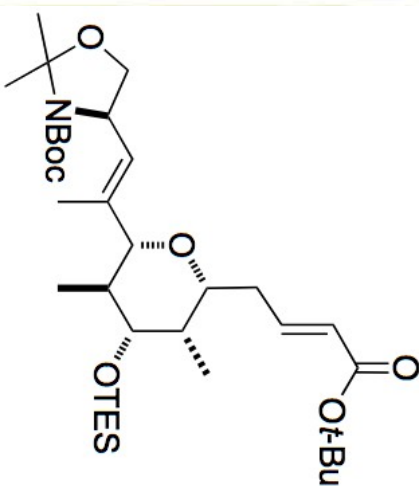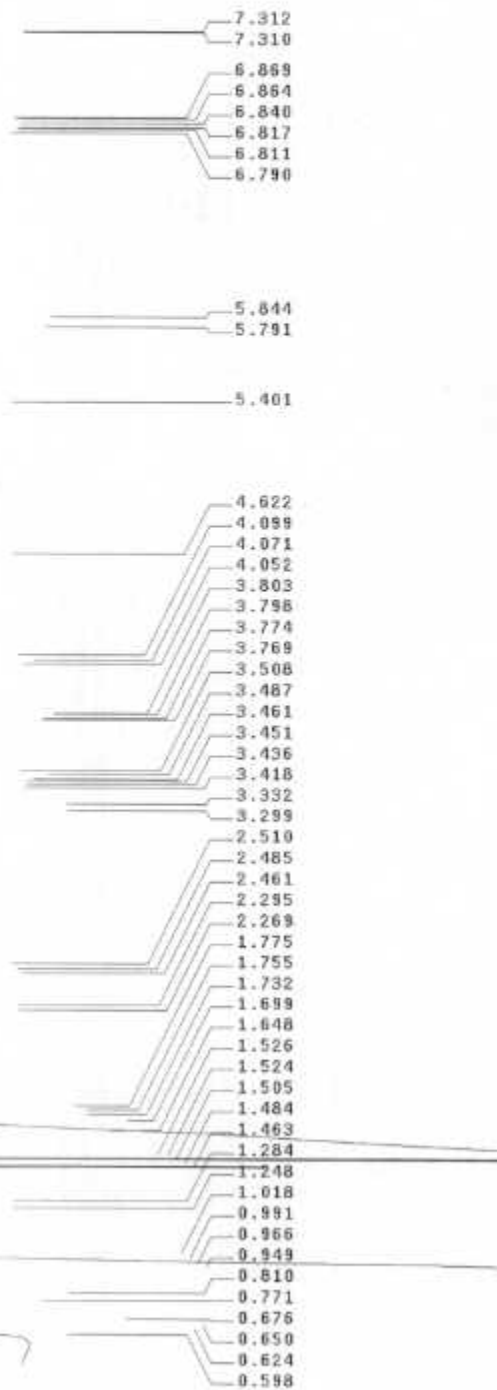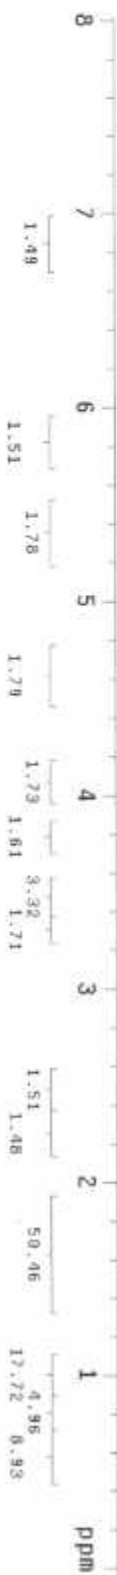

<sup>1</sup>H NMR spectrum for compound 48

University of Minnesota  
Department of Chemistry  
VAC-300

Pulse Sequence: szpu1

Spin rate: 20

Date: Feb. 15, 2002

Solvent: CDCl<sub>3</sub>

Starting time: 15:35:16

Completion time: 16:02:33

Total acq. time 26 minutes

UNITYplus-300 "vxf300"

Ambient temperature

PULSE SEQUENCE

Relax. delay 0.100 sec

Pulse 67.5 degrees

Acq. time 0.801 sec

Width 18667.9 Hz

576 repetitions

OBSERVE C13, 75.385910 MHz

DECOUPLE H1, 299.8604072 MHz

Power 36 dB

on during acquisition

off during delay

WALTZ-16 modulated

DATA PROCESSING

Line broadening 1.5 Hz

FT size 65536

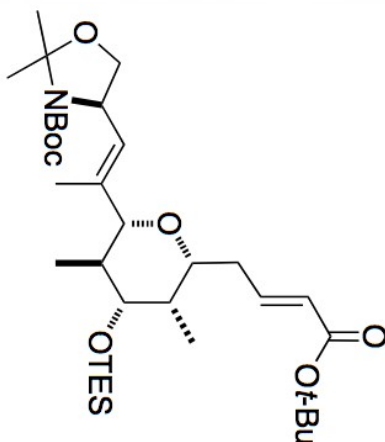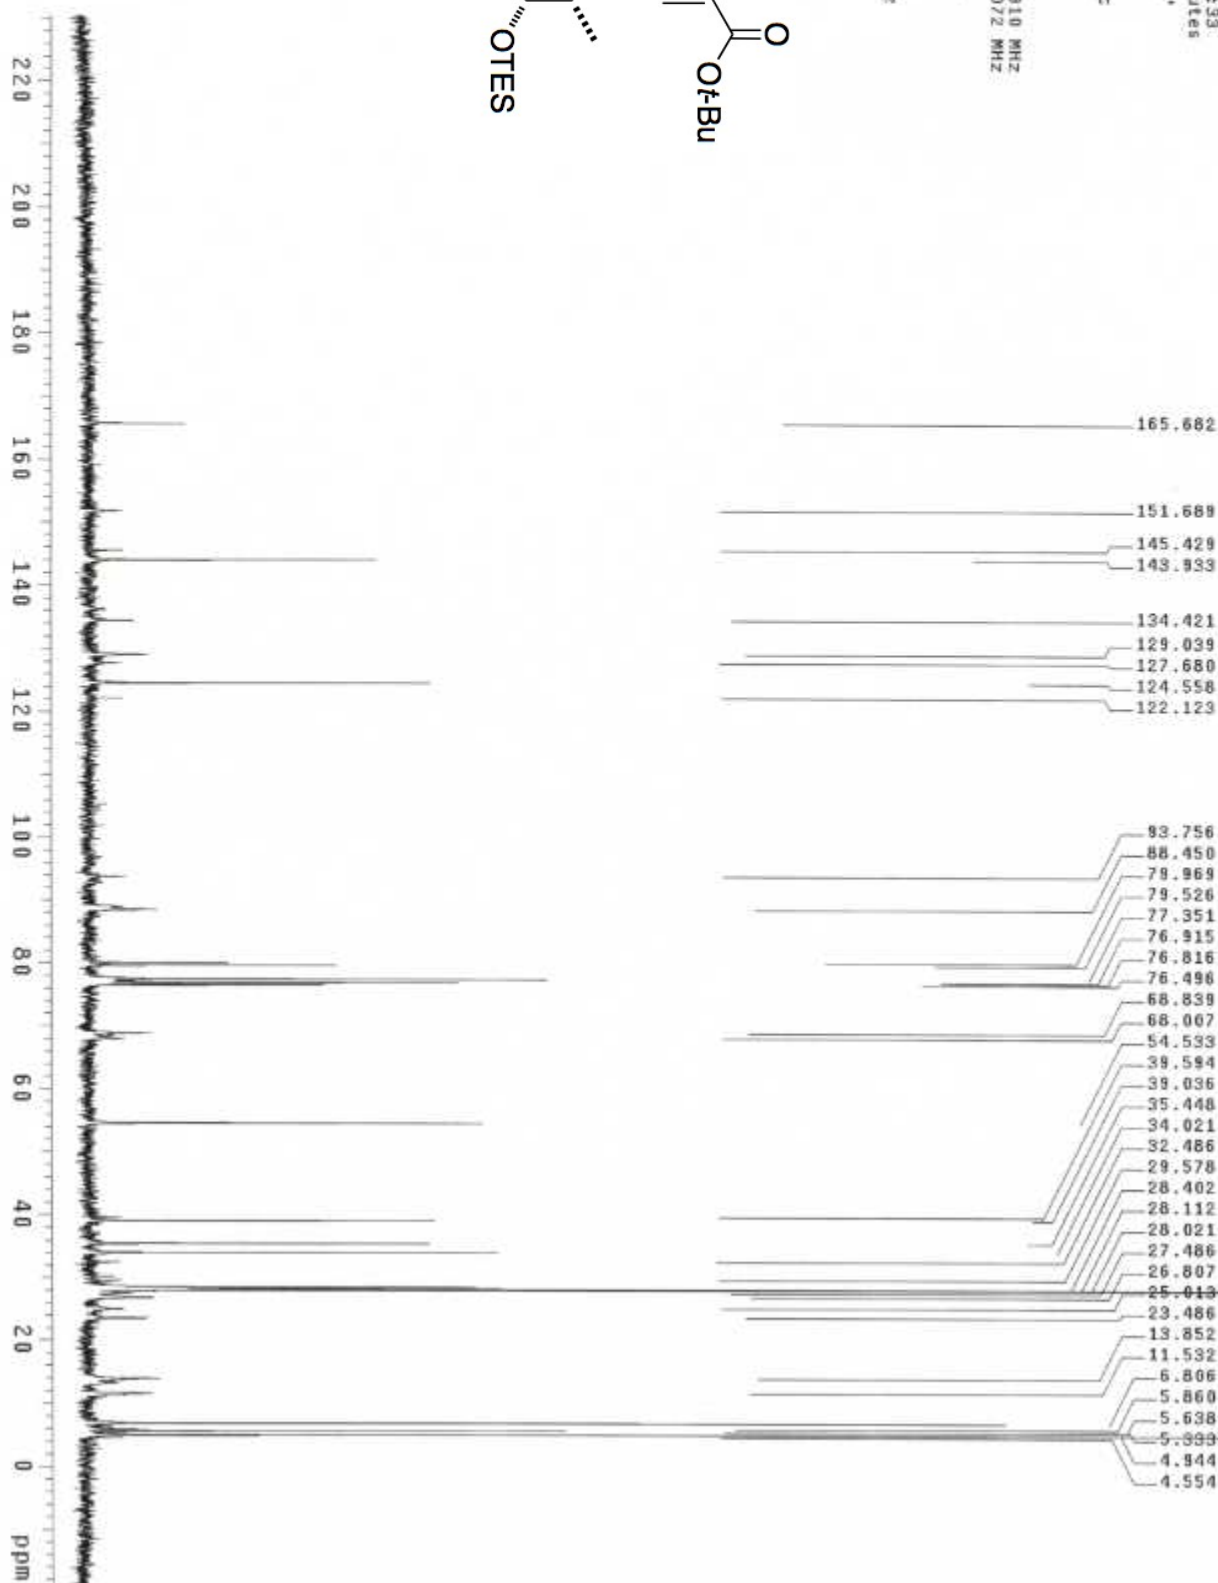

<sup>13</sup>C NMR spectrum for compound 48

Univ of Minnesota, VI-500

Pulse Sequence: szpu1

Date: Jul 5, 2006

File: BW-Phorb-simuloxazole-C18-C30-C24-OH

Starting Time: 21:09:35

Completion Time: 21:10:34

Total acq. time 1 minute

UNITplus-500 "v1500"

Ambient temperature

PULSE SEQUENCE

Relax. delay 1.500 sec

Pulse 45.0 degrees

Acq. time 1.892 sec

Width 8000.0 Hz

16 repetitions

08SERVE H1 499.8671219 MHz

DATA PROCESSING

Line broadening 0.1 Hz

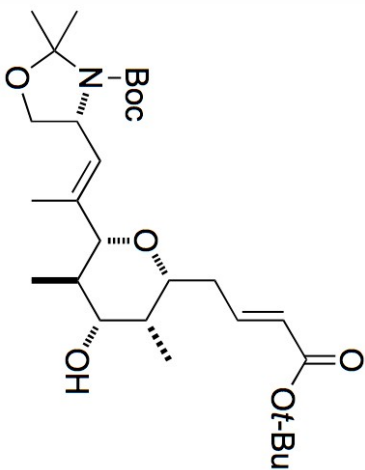

7.265  
6.822  
6.810  
6.805  
6.791  
6.779  
6.774  
6.762

5.820  
5.817  
5.791  
5.788

5.304

4.059  
3.777  
3.759  
3.521  
3.517  
3.507  
3.503  
3.493  
3.489  
3.328  
3.308  
2.479  
2.464  
2.308  
2.293  
1.901  
1.897  
1.891  
1.887  
1.883  
1.877  
1.874  
1.770  
1.685  
1.677  
1.664  
1.656  
1.651  
1.643  
1.630  
1.605  
1.578  
1.562

1.514  
1.480  
1.466  
1.439  
1.400  
1.212  
0.960  
0.948  
0.934  
0.885  
0.882  
0.871  
0.819

S-80

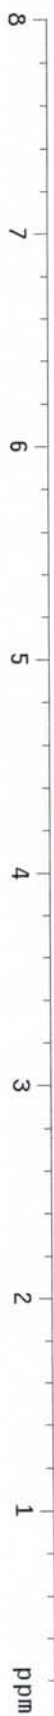

<sup>1</sup>H NMR spectrum for compound 53

Univ of Minnesota, VI-5008  
Pulse Sequence: szpul

Date: Aug. 4, 2006  
Solvent: cdc13  
File: BW-Phorb-stimuloxazole-C24-a1cohol-C  
Starting Time: 18:11:34  
Total acq. time 54 minutes

UNITYplus-500 "v1500"  
Ambient temperature

PULSE SEQUENCE  
Relax. delay 2.000 sec  
Pulse 67.5 degrees  
Acq. time 0.960 sec  
Width 32989.7 Hz  
672 repetitions  
OBSERVE C13, 125.6916844 MHz  
DECOUPLE H1, 499.8696213 MHz  
Power 36 dB  
on during acquisition  
off during delay  
WALTZ-16 modulated  
DATA PROCESSING  
Line broadening 1.0 Hz  
FT size 65536

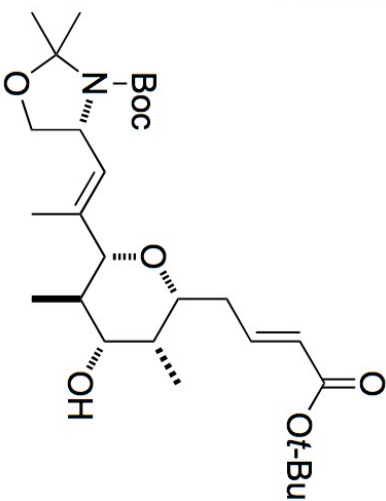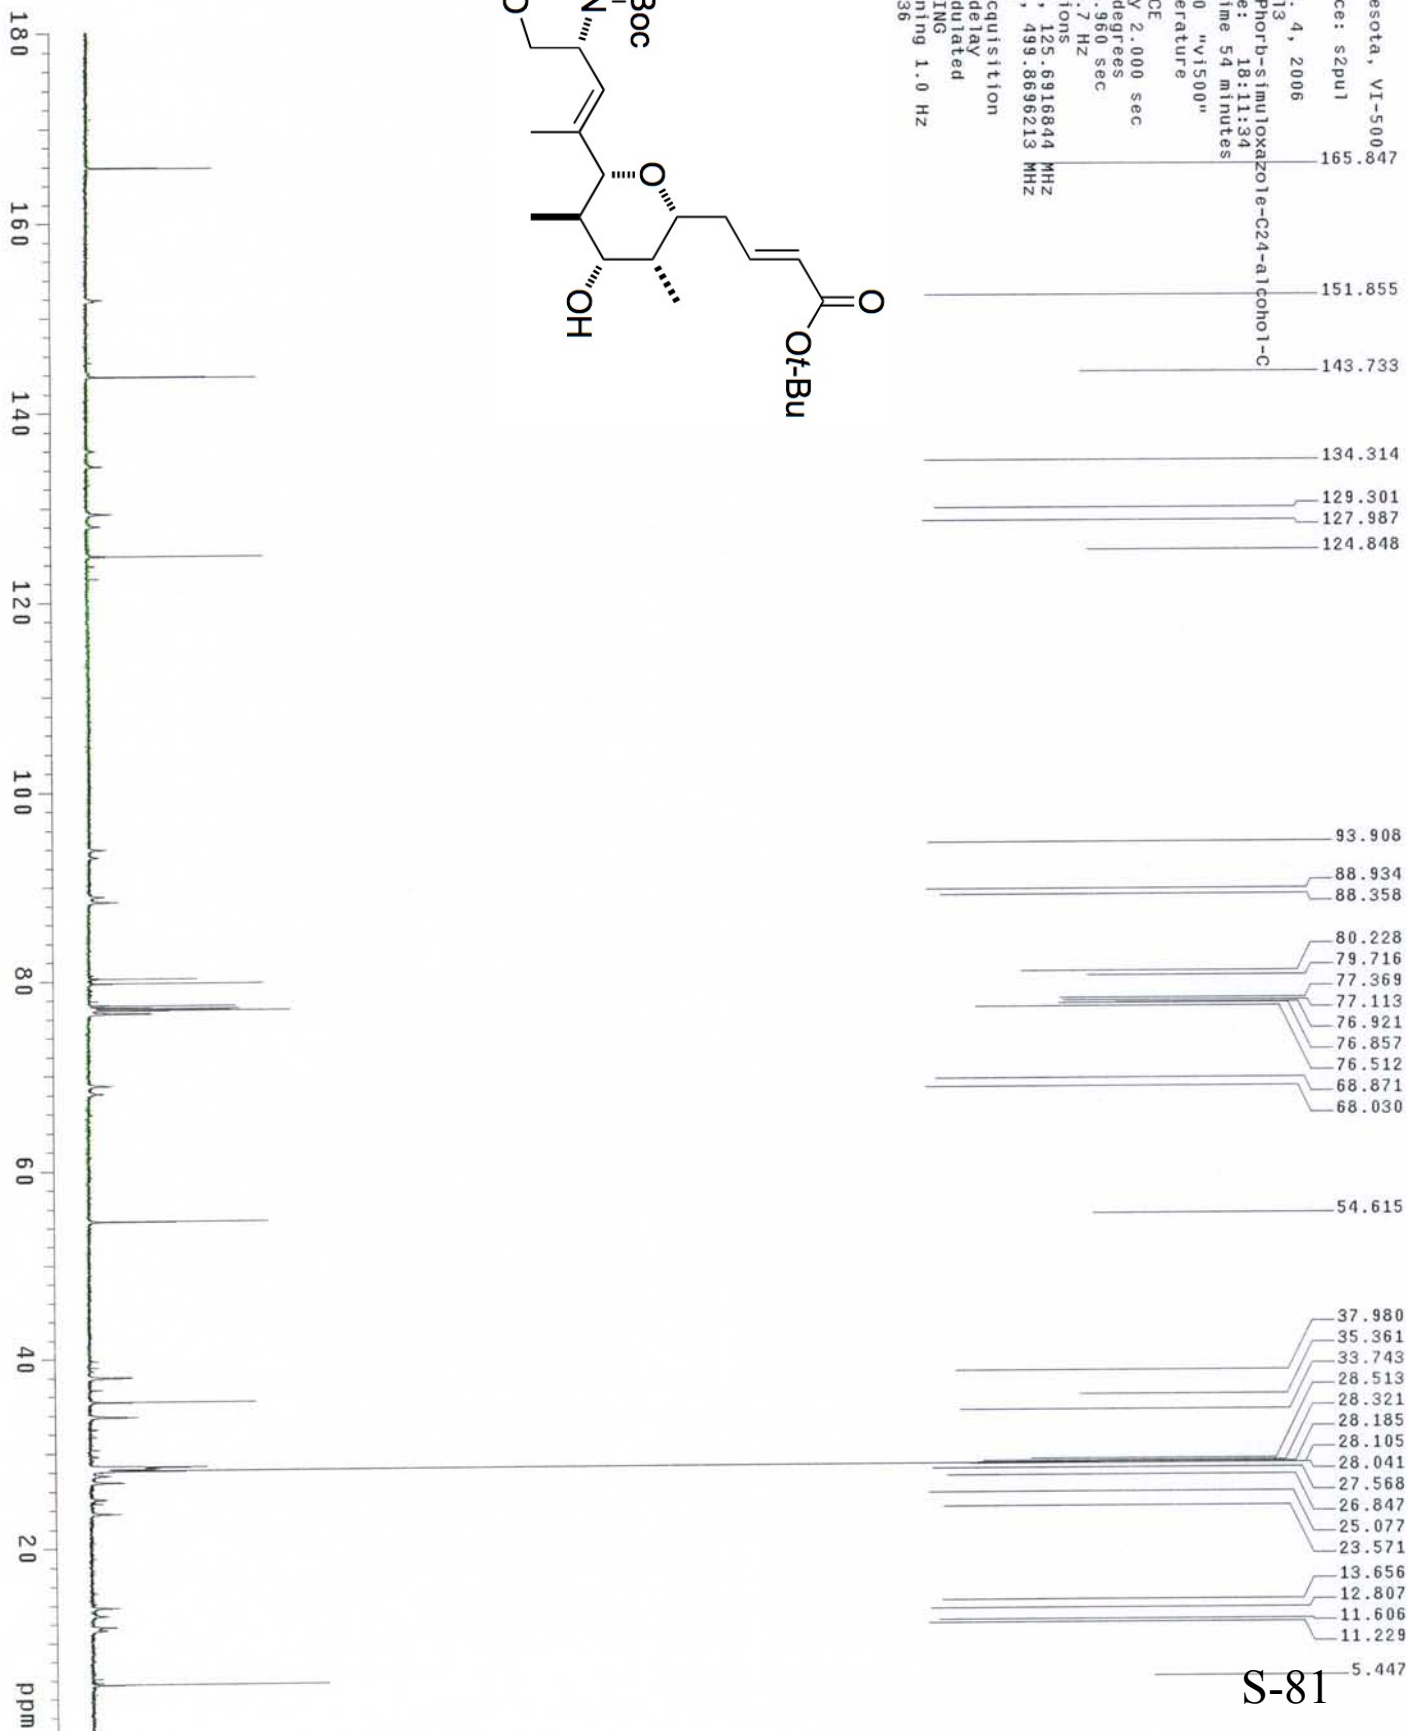

S-81

Pulse Sequence: s2pu1

Date: Jul. 6, 2006  
Solvent:  $\text{CHCl}_3$

File: BW-Phorb-simloxazole-C18-C30-C24-phosphonate

```
Starting Time: 21:41:41
Completion Time: 21:42:41
```

Total acq. time 1 minute

UNITYplus-500 "V15  
Ambient temperature

PULSE SEQUENCE

Relax. delay 1.500 sec  
Pulse 45.0 degrees

Acq. time 1.892 sec  
Width 8000.0 Hz

width 0000.0 Hz  
16 repetitions  
offset 0000.0 Hz

OBSEVE H1, 4  
DATA PROCESSING

Line  
FT si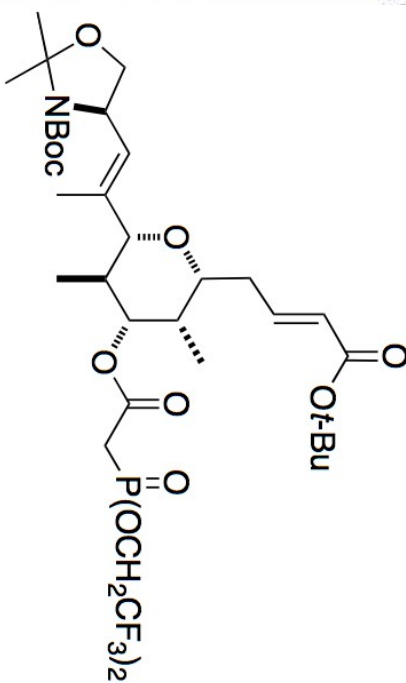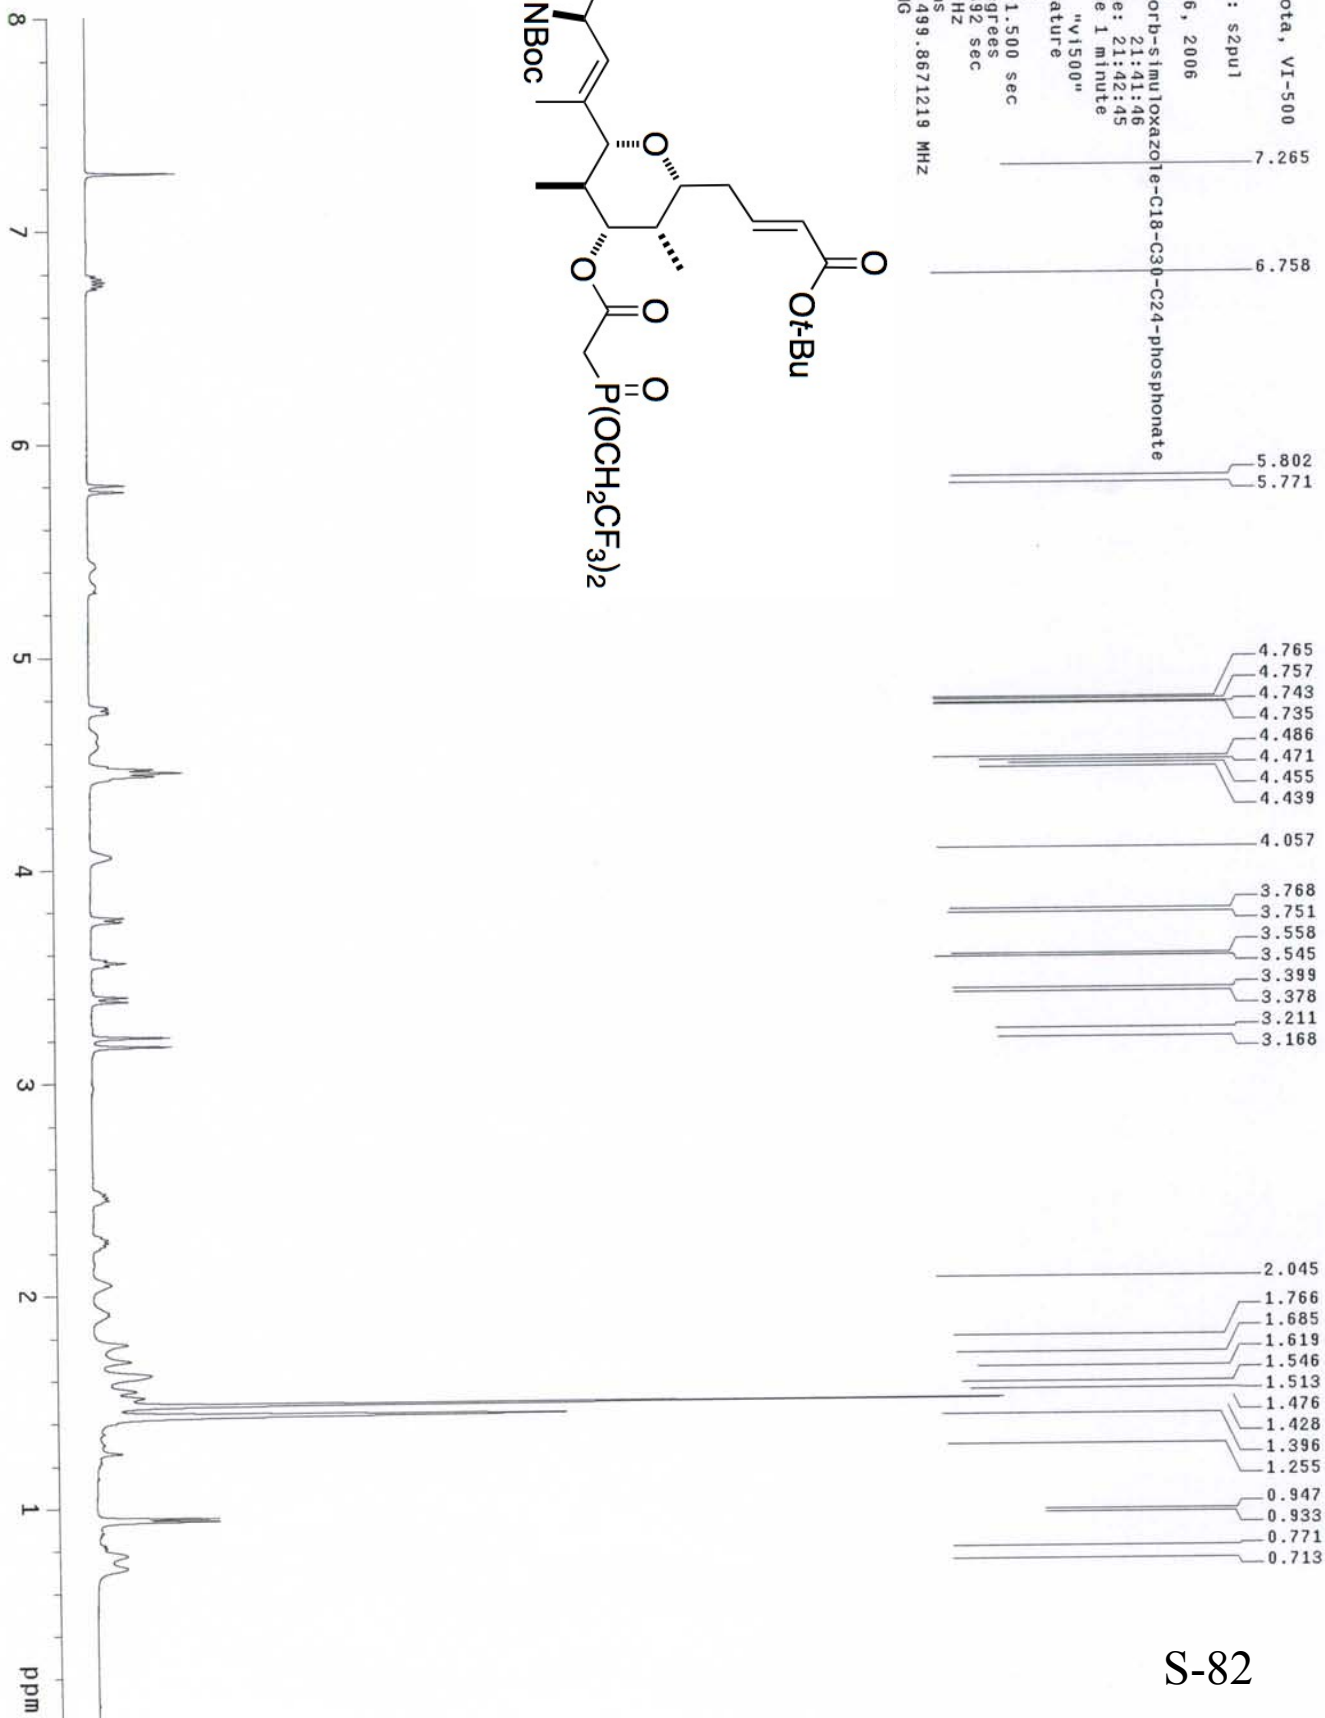

<sup>1</sup>H NMR spectrum for compound **54**

Univ of Minnesota, VI-5006  
 Pulse Sequence: s2pul

Date: Jul 10, 2006  
 Solvent: cdc13  
 File: BW-phorb-simuloxazole-C18-C30-C24-OP-C  
 Starting Time: 21:48:24  
 Total acq. time 106 minutes

UNITYplus-500 "v1500"  
 Ambient temperature

PULSE SEQUENCE  
 Relax. delay 2.000 sec  
 Pulse 67.5 degrees  
 Acq. time 0.960 sec  
 Width 32989.7 Hz  
 1312 repetitions  
 OBSERVE C13, 125.6916844 MHz  
 DECOUPLE H1, 499.8696213 MHz  
 Power 36 dB  
 on during acquisition  
 off during delay  
 WAIT-16 modulated  
 DAT  
 LI  
 FT

165.654  
 163.956

151.783

143.020

135.179

133.514

130.150

128.596

125.697

125.633

125.200

123.486

123.422

121.284

121.219

119.073

119.009

112.658

94.004

93.139

88.814

88.142

81.005

80.661

80.268

79.700

78.763

78.683

77.313

77.057

76.809

76.400

68.847

67.926

67.406

63.017

62.977

62.712

62.672

62.408

62.368

62.104

62.064

54.575

40.006

35.313

35.193

34.624

33.479

31.380

29.658

28.481

28.273

28.073

28.017

27.520

26.831

25.069

24.669

23.547

14.081

13.320

12.735

12.567

11.518

11.085

5.959

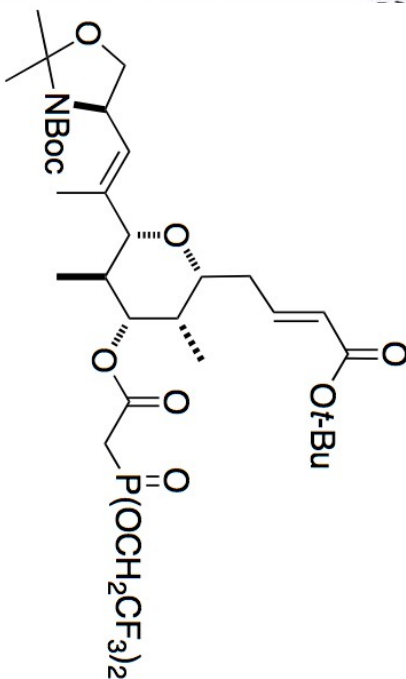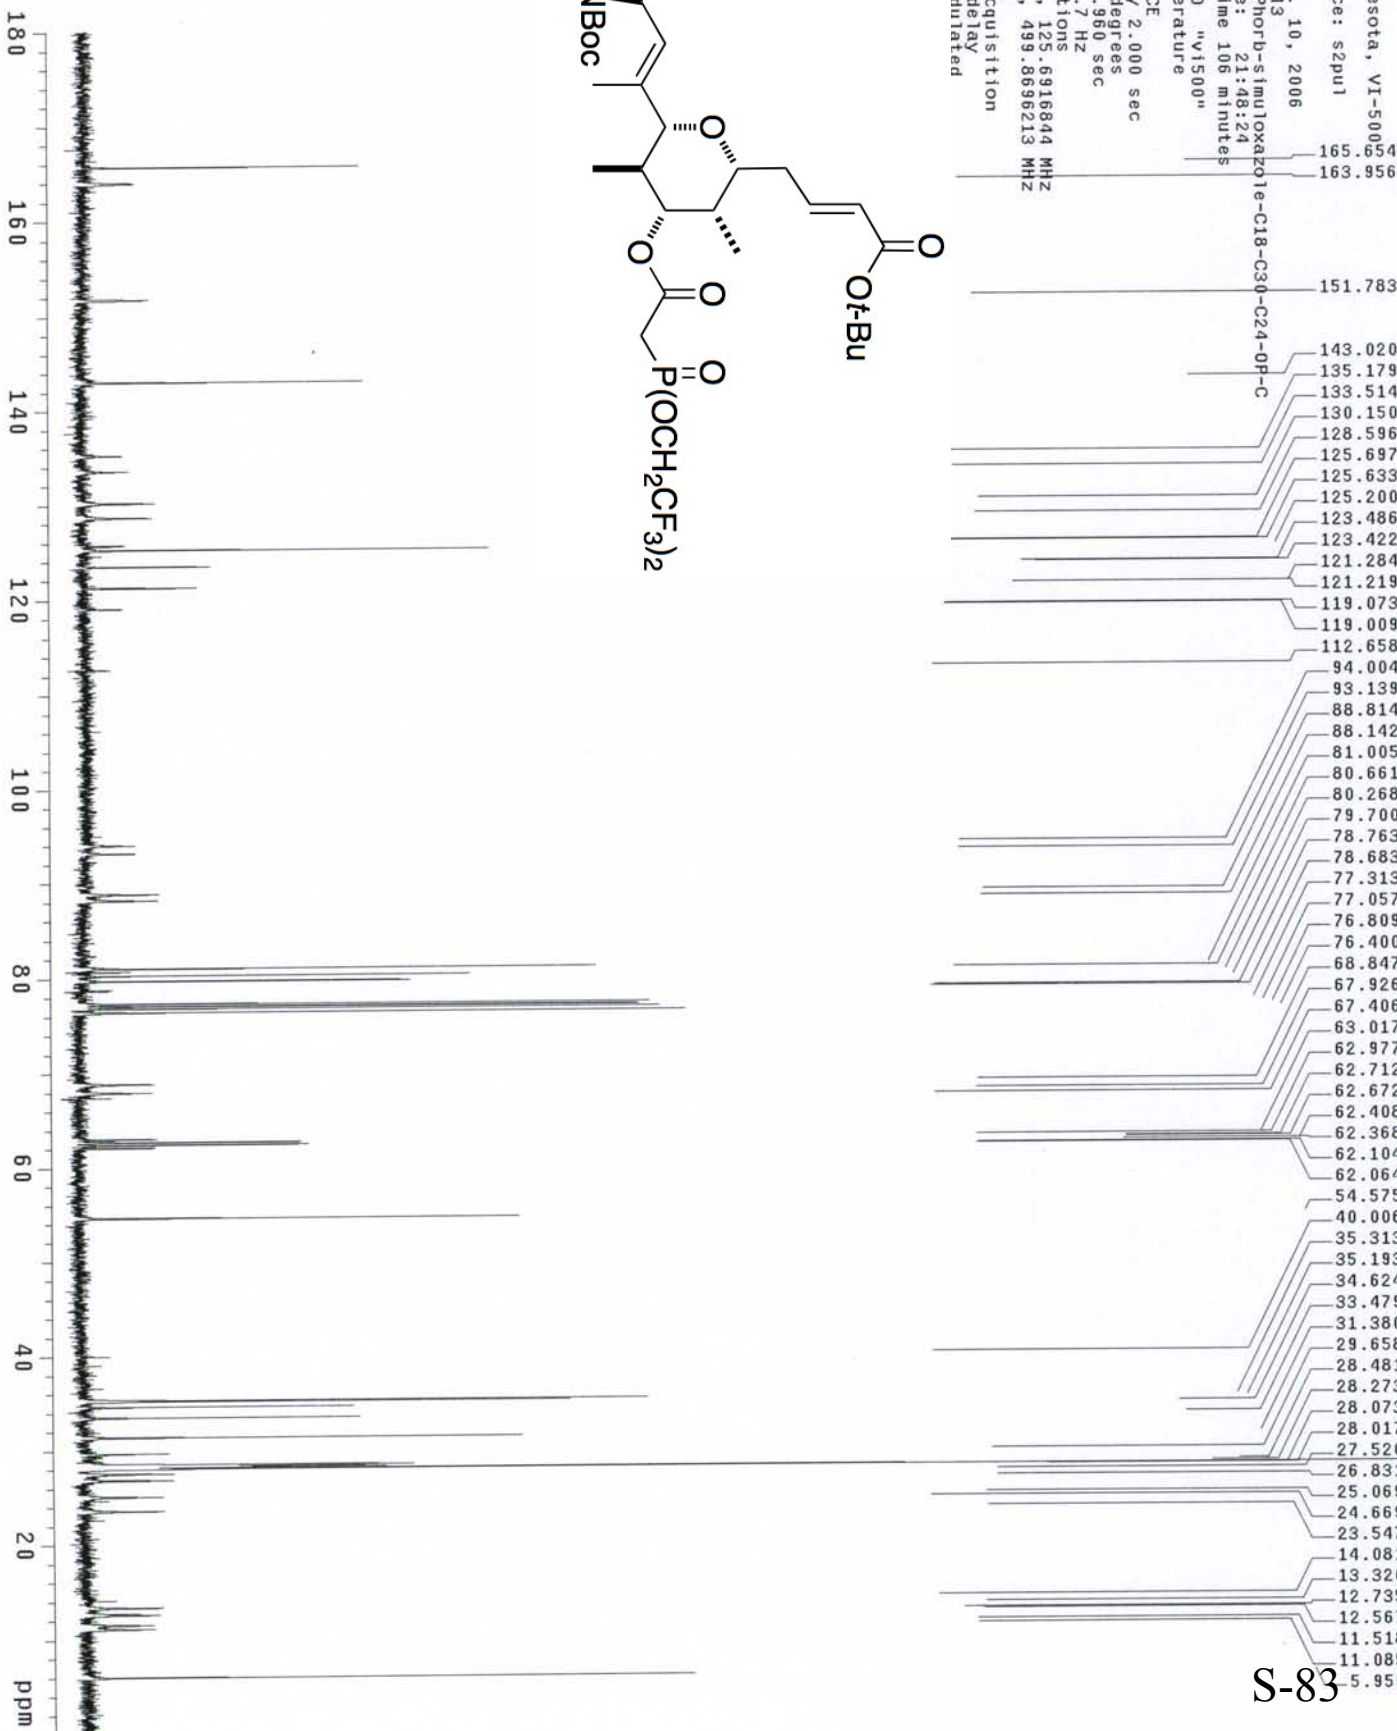

$^{13}\text{C}$  NMR spectrum for compound 54

Univ of Minnesota, VI-2006

Pulse Sequence: szput

User: cfobow

Date: Jul. 13, 2006

Solvent: cdcl3

File: BW-Phorb-simuloxazole-01-C30-2-3-2-1

Starting Time: 22:07:24

Total acq. time 3 minutes

UNITYplus-500 "field"

Ambient temperature

PULSE SEQUENCE

Relax. delay 1.500 sec

Pulse 45.0 degrees

Acq. time 1.845 sec

7.608  
7.608  
7.615  
7.402  
7.391  
7.388  
7.379  
7.366  
7.353  
7.265

4.794  
4.755

3.414  
3.394

1.573  
1.513  
1.496  
1.481  
1.465  
1.454  
1.424  
1.297  
1.273  
1.257  
1.079  
1.068  
0.934  
0.920

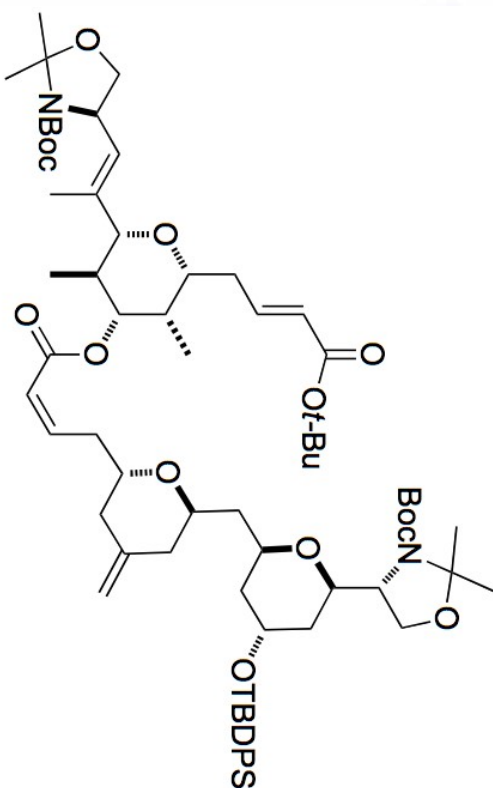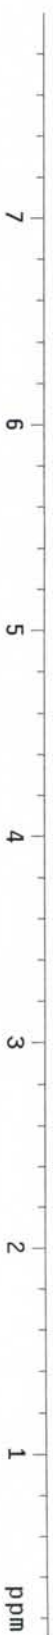

$^1\text{H}$  NMR spectrum for compound (2Z)-47

Univ of Minnesota  
 Date: Jul 16 2006  
 Pulse Sequence: zgpg30  
 Solvent: cdcl3  
 Starting Time: 13:45:38  
 Total acq. time 2.4 hours  
 UNITYplus-500 "v1500"  
 Ambient temperature  
 PULSE SEQUENCE  
 Relax. delay 2.000 sec  
 Pulse 67.5 degrees  
 Acq. time 0.960 sec  
 Width 3299.7 Hz  
 176 repetitions  
 OBSERVE C13, 125.6916844 MHz  
 DECOUPLE H1, 499.8696213 MHz  
 Power 36 dB  
 on during acquisition  
 off during delay  
 WALTZ-16 modulated  
 DATA PROCESSING  
 Line broadening 1.0 Hz  
 FT size 65536

15.290  
 14.145  
 13.528  
 12.815  
 11.662  
 11.205  
 6.256  
 19.375  
 22.410  
 22.698  
 23.636  
 23.900  
 24.717  
 25.149  
 25.894  
 26.695  
 27.047  
 27.568  
 28.161  
 28.433  
 28.577  
 29.699  
 30.331  
 31.533  
 31.669  
 32.293  
 32.654  
 33.455  
 33.895  
 35.425  
 38.869  
 39.181  
 39.790  
 39.966  
 54.639  
 59.373  
 63.265  
 63.513  
 65.884  
 67.069  
 68.014  
 68.903  
 69.144  
 69.272  
 69.536  
 69.889  
 70.890  
 71.306  
 76.616  
 76.825  
 77.081  
 77.337  
 78.042  
 79.692  
 80.100  
 80.260  
 88.350  
 88.982  
 93.412  
 93.940  
 110.623  
 112.377  
 120.595  
 125.088  
 127.555  
 127.699  
 128.340  
 129.549  
 129.725  
 133.746  
 133.970  
 134.403  
 135.628  
 135.740  
 141.651  
 143.340  
 147.458  
 151.477  
 156.577

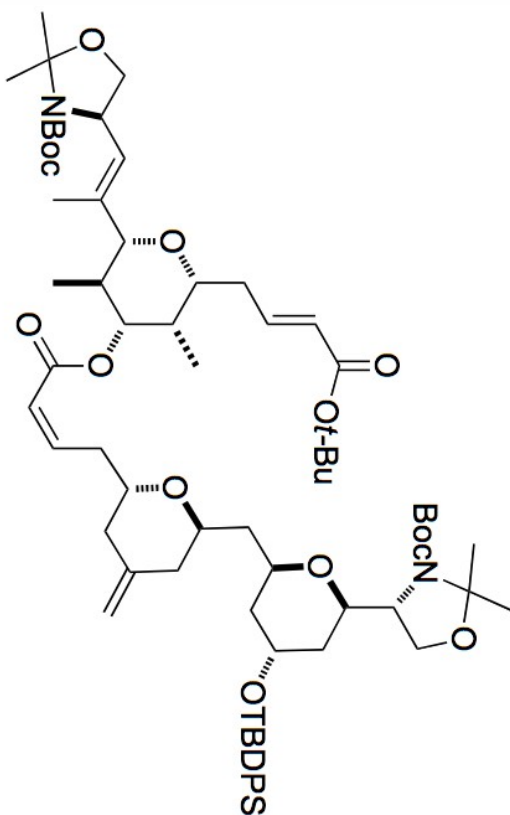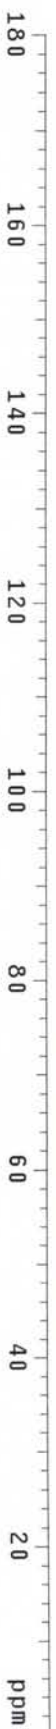

$^{13}\text{C}$  NMR spectrum for compound (2Z)-47

Univ of Minnesota  
 Date: Jul. 16, 2006  
 Solvent: cdc13  
 File: BW-phorb-simuloxazole-C1-C30-C2-C3-E  
 Starting Time: 22:35:35  
 Total acq. time 1 minute  
 UNITplus-500 "v1500"  
 Ambient temperature  
 PULSE SEQUENCE  
 Relax. delay 1.500 sec  
 Pulse 45.0 degrees  
 Acq. time 1.892 sec  
 Width 8000.0 Hz  
 16 repetitions  
 OBSERVE H1, 499.8671219 MHz  
 DATA PROCESSING  
 Line broadening 0.1 Hz  
 F1 S

Pulse Sequence: 62pul1

7.633  
 7.639  
 7.634  
 7.629  
 7.624  
 7.620  
 7.605  
 7.585  
 7.574  
 7.362  
 7.349  
 7.265  
 6.770  
 5.879  
 5.848  
 5.793  
 5.762  
 4.808  
 4.789  
 4.775  
 4.751  
 4.730  
 4.260  
 4.053  
 4.000  
 3.981  
 3.958  
 3.948  
 3.872  
 3.858  
 3.840  
 3.772  
 3.755  
 3.596  
 3.583  
 3.418  
 3.398  
 2.430  
 2.419  
 2.403  
 2.386  
 2.355  
 2.322  
 2.269  
 2.076  
 2.066  
 2.051  
 2.019  
 1.917  
 1.778  
 1.755  
 1.737  
 1.719  
 1.697  
 1.618  
 1.582  
 1.544  
 1.497  
 1.472  
 1.419  
 1.390  
 1.343  
 1.315  
 1.289  
 1.254  
 1.220  
 1.206  
 1.192  
 1.079  
 1.066  
 0.934  
 0.920  
 0.892  
 0.878  
 0.864  
 0.852  
 0.789  
 0.776  
 0.751  
 0.702  
 0.070

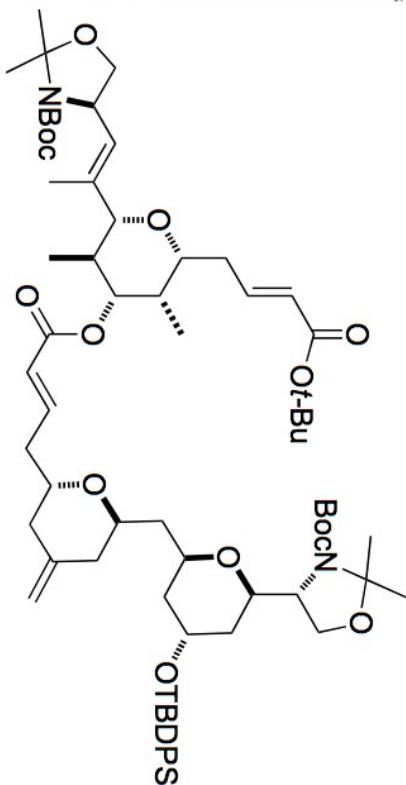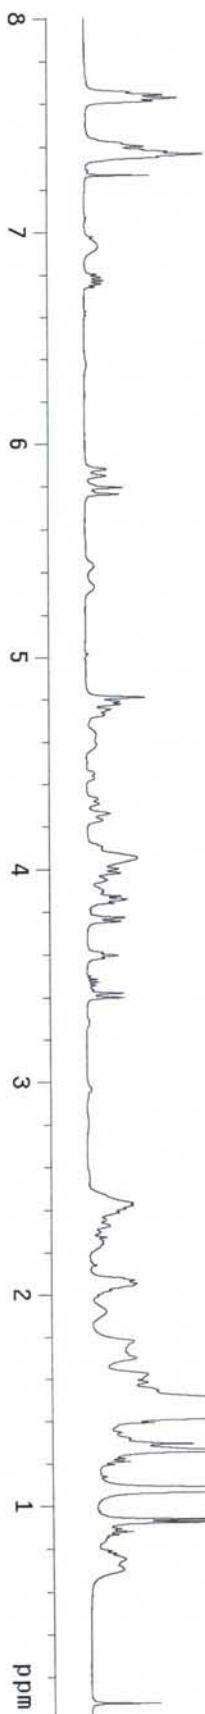

<sup>1</sup>H NMR spectrum for compound (2E)-47

Univ of Minnesota, VI-5007  
 Pulse Sequence: szpu1

Date: Jul. 16, 2006  
 Solvent: cdcl3  
 File: BW-phorb-simuloxazole-C1-C30-C2-C3-E-C  
 Starting Time: 22:43:11  
 Total acq. time 3.2 hours

UNITplus-500 "v1500"  
 Ambient temperature

PULSE SEQUENCE  
 Relax. delay 2.000 sec  
 Pulse 67.5 degrees  
 Acq. time 0.960 sec  
 Width 32989.7 Hz  
 2336 repetitions  
 OBSERVE C13, 125.6916844 MHz  
 DECOUPLE H1, 499.8696213 MHz  
 Power 36 db  
 on during acquisition  
 off during delay  
 WALTZ-16 modulated  
 DATA PROCESSING  
 Line broadening 1.0 Hz

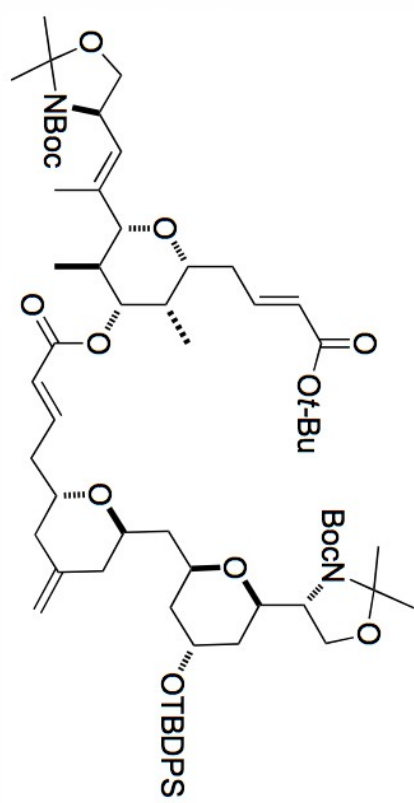

165.759  
 152.359  
 141.531  
 135.828  
 135.740  
 135.660  
 135.620  
 133.978  
 129.773  
 129.725  
 127.755  
 127.699  
 127.651  
 127.555  
 125.088

93.924  
 93.444  
 80.285  
 80.148  
 79.796  
 79.700  
 78.346  
 77.305  
 77.049  
 76.793  
 76.584  
 71.042  
 70.754  
 69.280  
 68.871  
 65.884  
 63.529  
 59.429  
 59.373  
 54.655  
 39.237  
 38.925  
 38.517  
 36.650  
 35.441  
 35.369  
 32.366  
 31.597  
 30.331  
 29.715  
 28.433  
 28.161  
 28.089  
 27.031  
 26.679  
 25.926  
 23.908  
 22.706  
 22.434  
 19.391  
 19.263  
 14.145  
 6.248

S-87

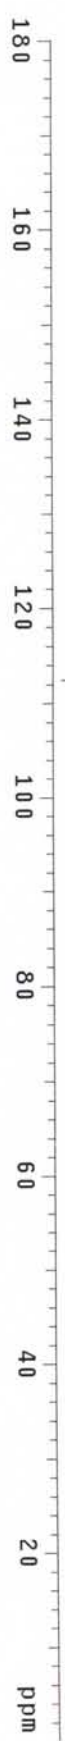

<sup>13</sup>C NMR spectrum for compound (2E)-47





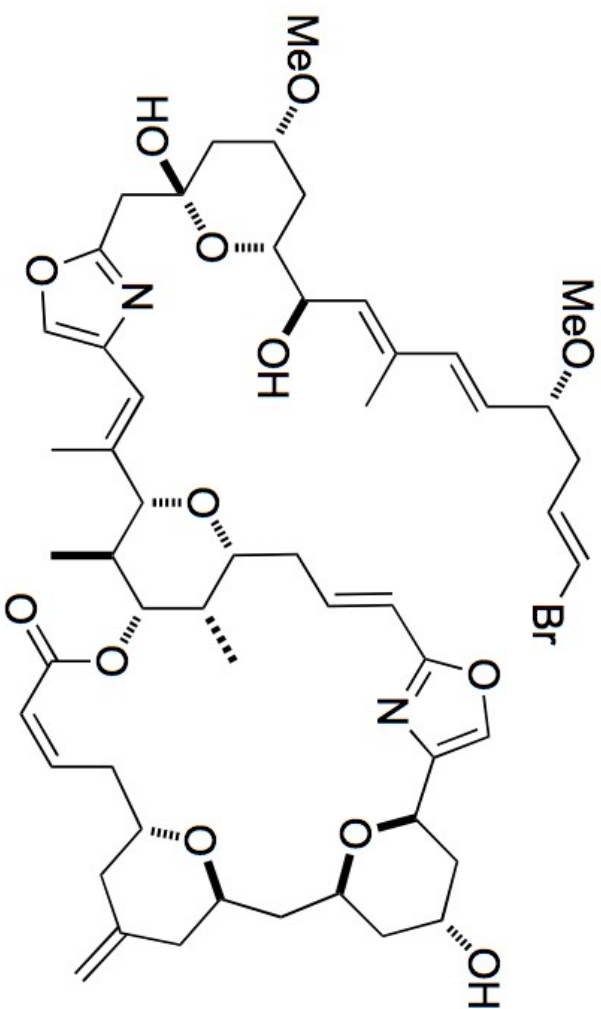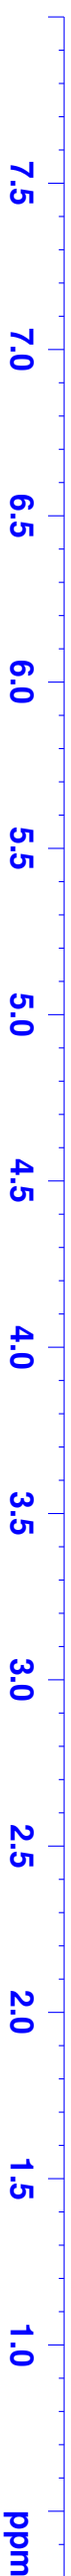

<sup>1</sup>H NMR spectrum for phorbazole A (1)

```

Current Data Parameters
NAME          phorborexazole A
EXPNO         1
PROCNO        1

F2 - Acquisition Parameters
Date_         20070817
Time          17.15
INSTRUM       spect
PROBHD        5 mm Multinuc1
PULPROG       zg30
TD            65536
SOLVENT       CDCl3
NS            144
DS            2
SWH           10330.578 Hz
FIDRES       0.157632 Hz
AQ           3.1719923 sec
RG           724.1
DE           48.400 usec
TE           300.2 K
D1           1.00000000 sec
MCREST       0.00000000 sec
MCWRK       0.01500000 sec

===== CHANNEL f1 =====
NUC1          1H
P1           14.80 usec
PL1         -1.00 dB
SFO1         500.0230878 MHz

F2 - Processing parameters
SI           32768
SF          500.020000 MHz
WDW          EM
SSB          0
LB          0.30 Hz
GB          0
PC          1.00

```



University of Minnesota  
Department of Chemistry  
VI-300

Pulse Sequence: szpul

Date: Jul. 28, 2006

Solvent: cdcl3

File: BW-phorb-simuloxazole-C1-C46-bisamide-C

Starting Time: 22:48:18

Total acq. time 3.4 hours

UNITplus-300 "v1300"

Ambient temperature

PULSE SEQUENCE

Relax. delay 2.000 sec

Pulse 67.5 degrees

Acq. time 0.801 sec

Width 18867.9 Hz

2624 repetitions

OBSERVE C13, 75.4774055 MHz

DECOUPLE H1, 300.1698406 MHz

Power 38 dB

on during acquisition

off during delay

168.263  
166.488  
165.920

143.622  
141.424  
138.287  
137.302  
137.019  
135.508  
134.126  
133.905  
133.531  
132.080  
129.684  
129.600  
127.569  
127.516  
126.561  
125.859  
122.218  
109.897

99.332  
88.996  
80.386  
79.958  
79.485  
77.355  
76.928  
76.508  
75.729  
74.111  
73.523  
73.027  
71.775  
71.271  
70.905  
69.989  
65.531  
64.890  
56.439  
55.340  
53.737  
48.859  
47.462  
43.630  
40.248  
39.050  
38.126  
37.836  
37.668  
35.294  
33.477  
32.882  
32.378  
32.126  
30.928  
29.470  
26.844  
25.561  
25.355  
19.057  
17.989  
13.172  
11.706  
5.958  
-4.668  
-4.859

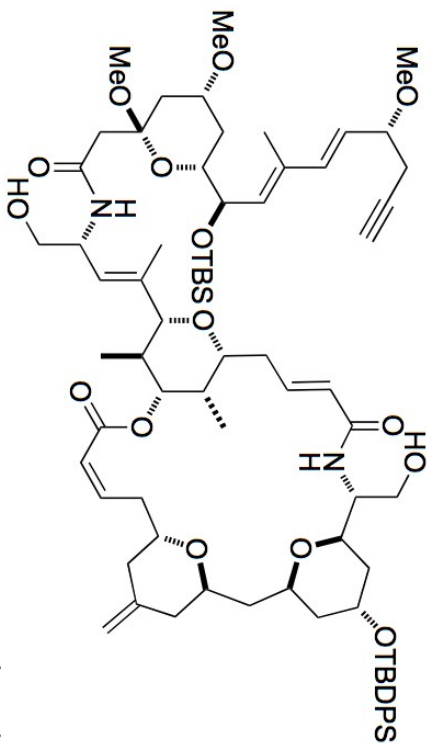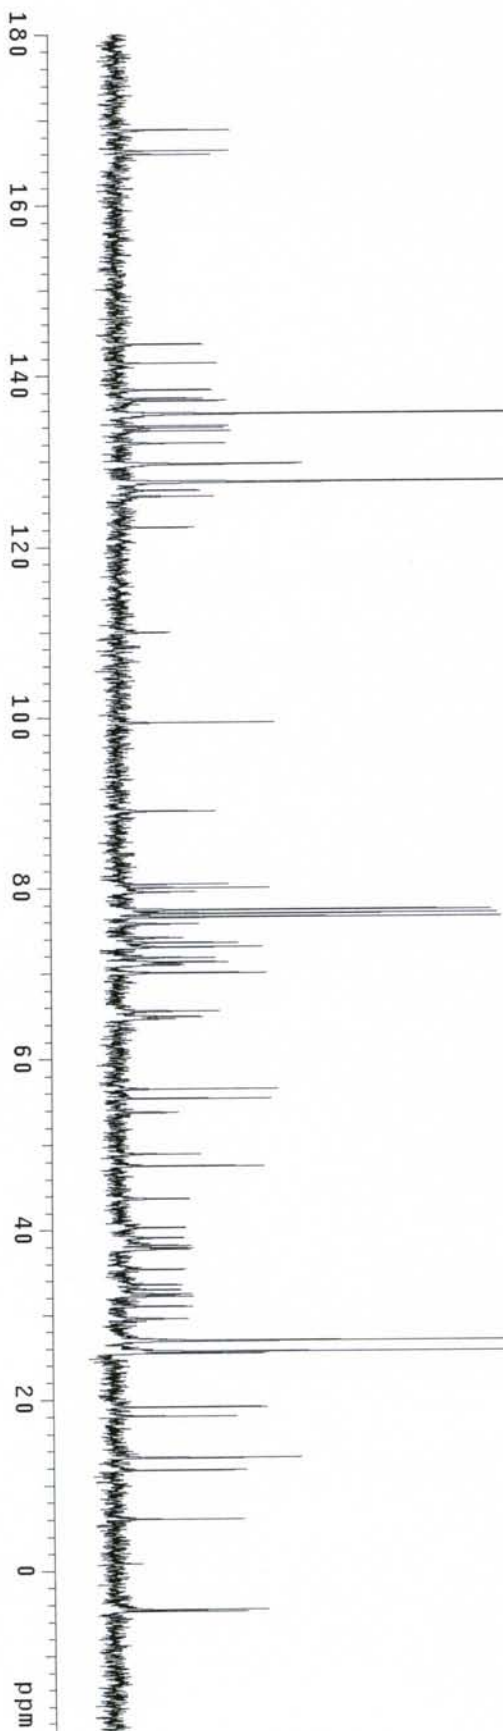

$^{13}\text{C}$  NMR spectrum for compound 45

7.662  
7.659  
7.657  
7.646  
7.643  
7.634  
7.630  
7.628  
7.551  
7.440  
7.428  
7.425  
7.409  
7.399  
7.384  
7.381  
7.377  
7.376  
7.367  
7.363  
7.360  
7.350  
7.344  
7.266  
6.274  
6.242  
5.922  
3.582  
3.340  
3.324  
3.317  
3.313  
3.311  
3.303  
3.295  
3.287  
3.009  
2.017  
2.012  
2.006  
1.987  
1.985  
1.912  
1.891  
1.805  
1.803  
1.414  
1.394  
1.392  
1.386  
1.369  
1.289  
1.357  
1.272  
1.255  
1.243  
1.242  
1.082  
1.056  
1.032  
0.994  
0.980  
0.889  
0.878  
0.873  
0.862  
0.857  
0.785  
0.772  
0.080  
0.074  
0.072  
0.021  
0.018

3

3-9

**S**

[illegible][illegible]

121.9 MHz

>>

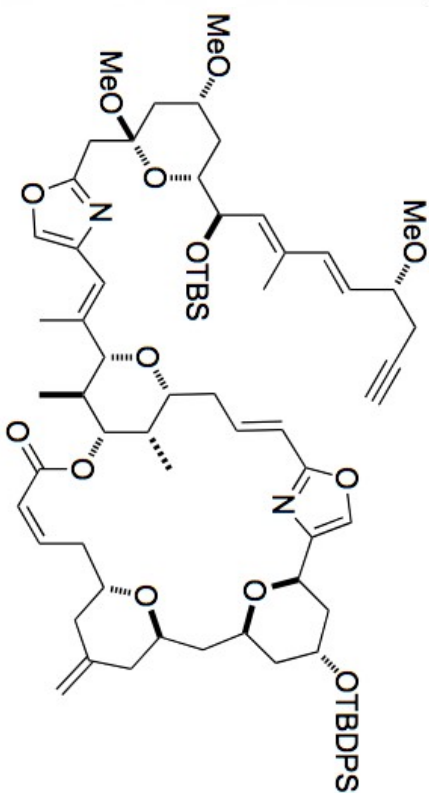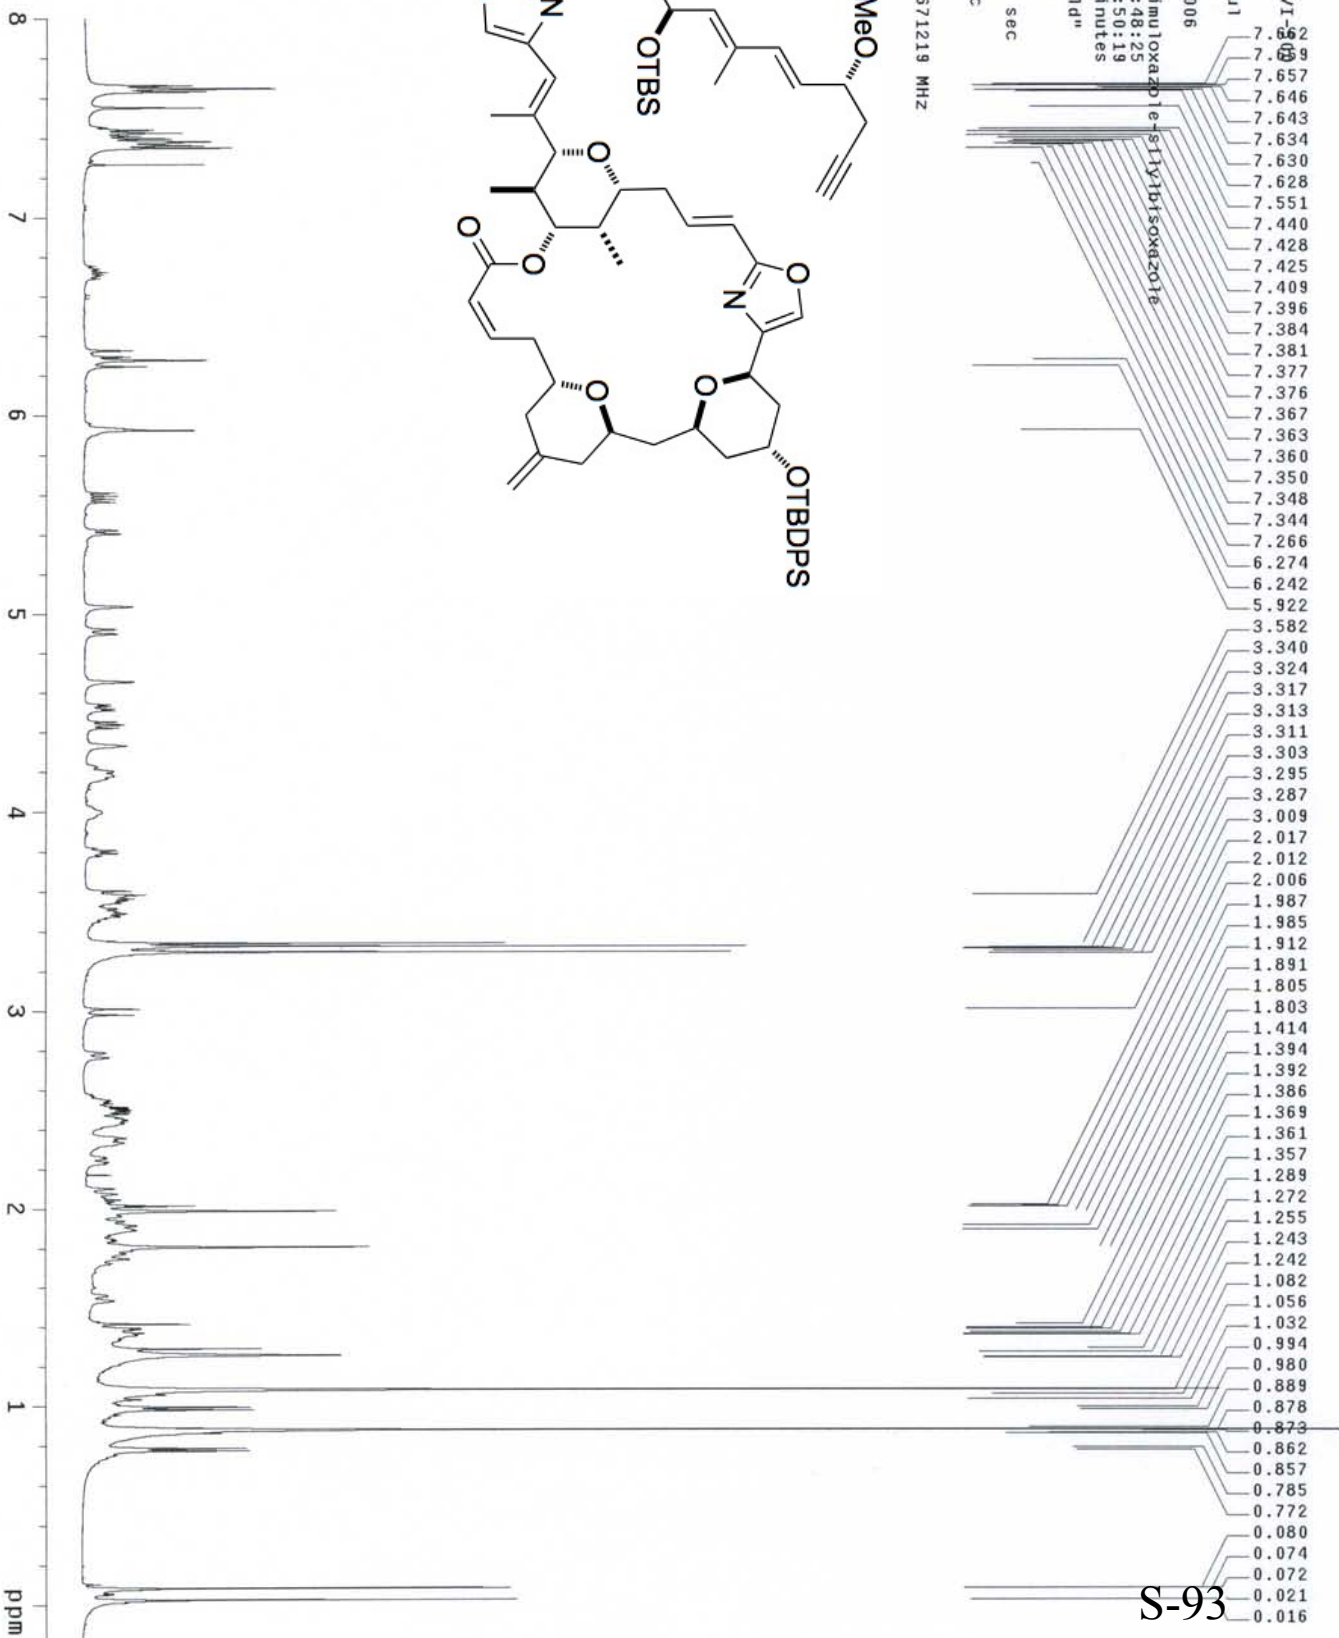

<sup>1</sup>H NMR spectrum for compound 33

Univ of Minnesota VLSI  
Pulse Sequence: seq1  
159 160 161 162 163 164 165 166 167 168 169 170 171 172 173 174 175 176 177 178 179 180 181 182 183 184 185 186 187 188 189 190 191 192 193 194 195 196 197 198 199 200 201 202 203 204 205 206 207 208 209 210 211 212 213 214 215 216 217 218 219 220 221 222 223 224 225 226 227 228 229 230 231 232 233 234 235 236 237 238 239 240 241 242 243 244 245 246 247 248 249 250 251 252 253 254 255 256 257 258 259 260 261 262 263 264 265 266 267 268 269 270 271 272 273 274 275 276 277 278 279 280 281 282 283 284 285 286 287 288 289 290 291 292 293 294 295 296 297 298 299 300 301 302 303 304 305 306 307 308 309 310 311 312 313 314 315 316 317 318 319 320 321 322 323 324 325 326 327 328 329 330 331 332 333 334 335 336 337 338 339 340 341 342 343 344 345 346 347 348 349 350 351 352 353 354 355 356 357 358 359 360 361 362 363 364 365 366 367 368 369 370 371 372 373 374 375 376 377 378 379 380 381 382 383 384 385 386 387 388 389 390 391 392 393 394 395 396 397 398 399 400 401 402 403 404 405 406 407 408 409 410 411 412 413 414 415 416 417 418 419 420 421 422 423 424 425 426 427 428 429 430 431 432 433 434 435 436 437 438 439 440 441 442 443 444 445 446 447 448 449 450 451 452 453 454 455 456 457 458 459 460 461 462 463 464 465 466 467 468 469 470 471 472 473 474 475 476 477 478 479 480 481 482 483 484 485 486 487 488 489 490 491 492 493 494 495 496 497 498 499 500 501 502 503 504 505 506 507 508 509 510 511 512 513 514 515 516 517 518 519 520 521 522 523 524 525 526 527 528 529 530 531 532 533 534 535 536 537 538 539 540 541 542 543 544 545 546 547 548 549 550 551 552 553 554 555 556 557 558 559 560 561 562 563 564 565 566 567 568 569 570 571 572 573 574 575 576 577 578 579 580 581 582 583 584 585 586 587 588 589 590 591 592 593 594 595 596 597 598 599 600 601 602 603 604 605 606 607 608 609 610 611 612 613 614 615 616 617 618 619 620 621 622 623 624 625 626 627 628 629 630 631 632 633 634 635 636 637 638 639 640 641 642 643 644 645 646 647 648 649 650 651 652 653 654 655 656 657 658 659 660 661 662 663 664 665 666 667 668 669 670 671 672 673 674 675 676 677 678 679 680 681 682 683 684 685 686 687 688 689 690 691 692 693 694 695 696 697 698 699 700 701 702 703 704 705 706 707 708 709 710 711 712 713 714 715 716 717 718 719 720 721 722 723 724 725 726 727 728 729 730 731 732 733 734 735 736 737 738 739 740 741 742 743 744 745 746 747 748 749 750 751 752 753 754 755 756 757 758 759 760 761 762 763 764 765 766 767 768 769 770 771 772 773 774 775 776 777 778 779 780 781 782 783 784 785 786 787 788 789 790 791 792 793 794 795 796 797 798 799 800 801 802 803 804 805 806 807 808 809 810 811 812 813 814 815 816 817 818 819 820 821 822 823 824 825 826 827 828 829 830 831 832 833 834 835 836 837 838 839 840 841 842 843 844 845 846 847 848 849 850 851 852 853 854 855 856 857 858 859 860 861 862 863 864 865 866 867 868 869 870 871 872 873 874 875 876 877 878 879 880 881 882 883 884 885 886 887 888 889 890 891 892 893 894 895 896 897 898 899 900 901 902 903 904 905 906 907 908 909 910 911 912 913 914 915 916 917 918 919 920 921 922 923 924 925 926 927 928 929 930 931 932 933 934 935 936 937 938 939 940 941 942 943 944 945 946 947 948 949 950 951 952 953 954 955 956 957 958 959 960 961 962 963 964 965 966 967 968 969 970 971 972 973 974 975 976 977 978 979 980 981 982 983 984 985 986 987 988 989 990 991 992 993 994 995 996 997 998 999 1000 1001 1002 1003 1004 1005 1006 1007 1008 1009 1010 1011 1012 1013 1014 1015 1016 1017 1018 1019 1020 1021 1022 1023 1024 1025 1026 1027 1028 1029 1030 1031 1032 1033 1034 1035 1036 1037 1038 1039 1040 1041 1042 1043 1044 1045 1046 1047 1048 1049 1050 1051 1052 1053 1054 1055 1056 1057 1058 1059 1060 1061 1062 1063 1064 1065 1066 1067 1068 1069 1070 1071 1072 1073 1074 1075 1076 1077 1078 1079 1080 1081 1082 1083 1084 1085 1086 1087 1088 1089 1090 1091 1092 1093 1094 1095 1096 1097 1098 1099 1100 1101 1102 1103 1104 1105 1106 1107 1108 1109 1110 1111 1112 1113 1114 1115 1116 1117 1118 1119 1120 1121 1122 1123 1124 1125 1126 1127 1128 1129 1130 1131 1132 1133 1134 1135 1136 1137 1138 1139 1140 1141 114

144.390  
142.236  
141.763  
137.847  
137.582  
137.142  
136.293  
135.708  
134.234  
134.170  
133.986  
133.866  
133.778  
132.496  
129.813  
129.781  
127.715  
127.371  
121.027  
119.377  
119.257  
110.183  
—99.851

89.279  
80.653  
80.589  
80.325  
79.412  
77.986  
77.313  
77.057  
76.801  
73.581  
73.493  
72.123  
69.977  
69.120  
68.871  
67.238  
65.924  
56.617  
55.656  
47.935  
41.328  
39.302  
39.149  
38.981  
37.027  
35.601  
35.241  
34.400  
32.582  
31.781  
30.459  
29.715  
27.039  
25.798  
25.726  
19.295  
18.245  
14.241  
13.488  
13.336  
6.031  
-4.5499  
-4.605

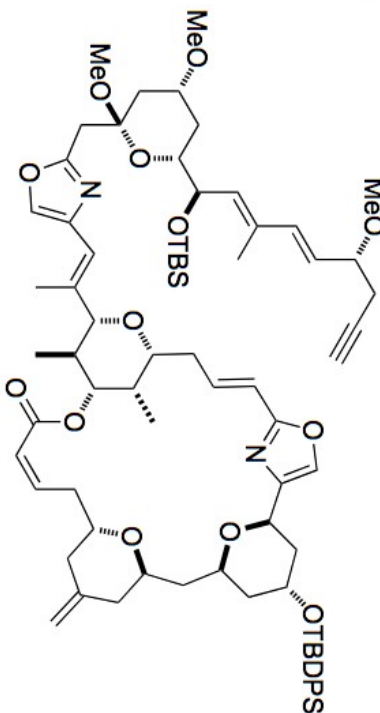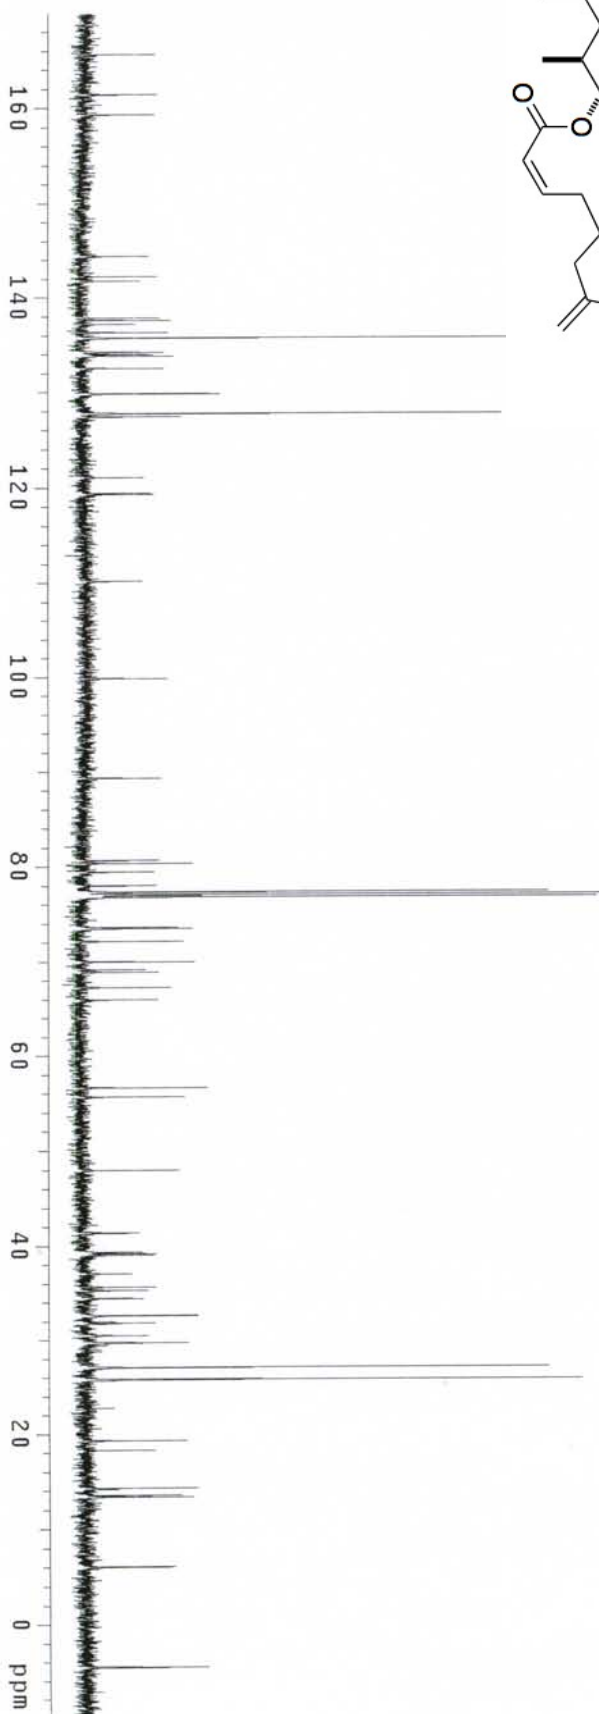

**$^{13}\text{C}$  NMR spectrum for compound 33**

Pulse Sequence: szpu1  
 User: cfobow  
 Date: Aug 12, 2006  
 Solvent: cdcl3  
 File: BW-33-Dmethyl-45-46-5-ethyl-10-methyl-10-oxo-2,3,4,5-tetrahydro-2H-pyran-2-yl  
 Starting Time: 16:21:50  
 Completion Time: 16:21:55  
 Total acq. time 1 minute  
 UNITYplus-500 "field"  
 Ambient temperature  
 PULSE SEQUENCE  
 Relax. delay 1.500 sec  
 Pulse 88.1 degrees  
 Acq. time 1.892 sec  
 Width 4383.1 Hz  
 Single scan  
 OBSERVE H1, 499.8671220 MHz  
 DATA PROCESSING  
 FT size 131072

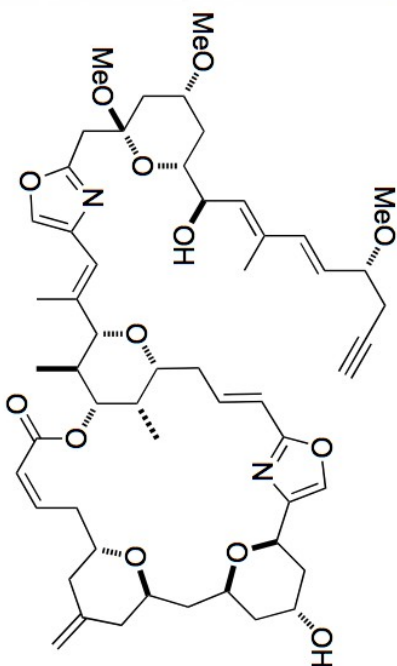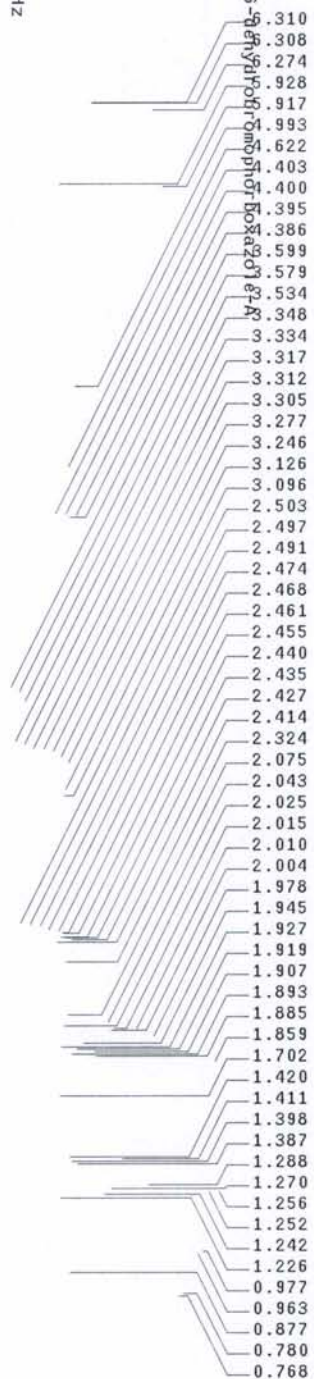

<sup>1</sup>H NMR spectrum for compound 34



45-46-DEBPA

Pulse Sequence: s2pul

Solvent: CDCl<sub>3</sub>

Temp. 20.0 C / 293.1 K

User: 1-15-87

INNOVA-800 "inova8001"

Relax. delay 1.500 sec

Pulse 108.0 degrees

Acq. time 2.000 sec

Width 10000.0 Hz

64 repetitions

OBSERVE H1, 800.2406560 MHz

DATA PROCESSING

Line broadening 0.1 Hz

FT size 8192

Total time 3 min, 44 sec

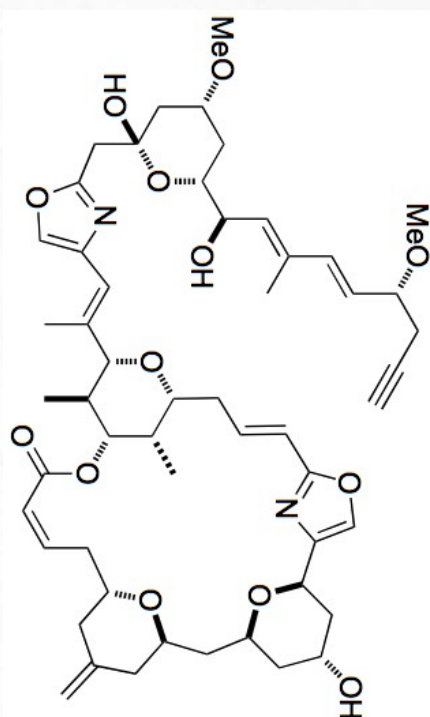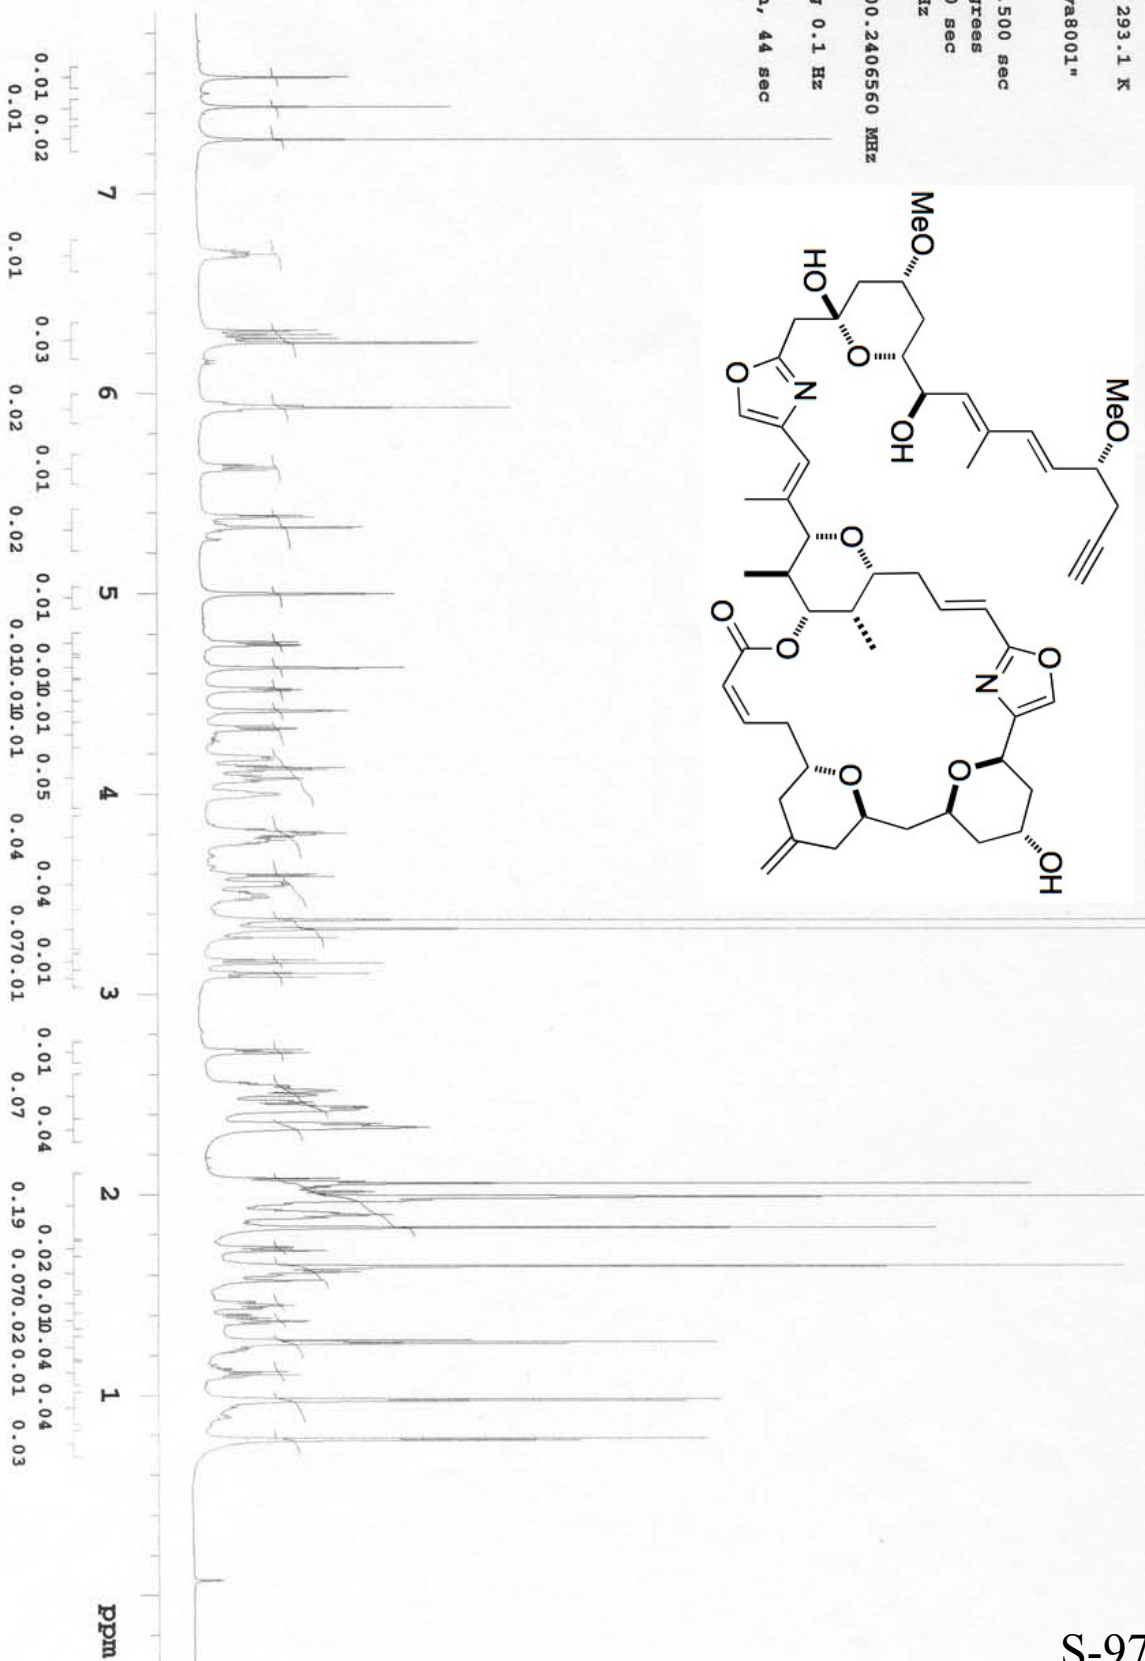

<sup>1</sup>H NMR spectrum for 45,46-dehydrobromo-phorboxazole (35)

Line broadening 1.5 Hz  
FT size 65536

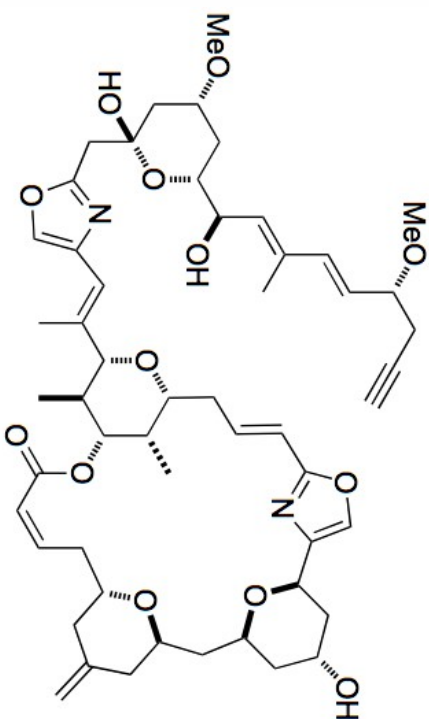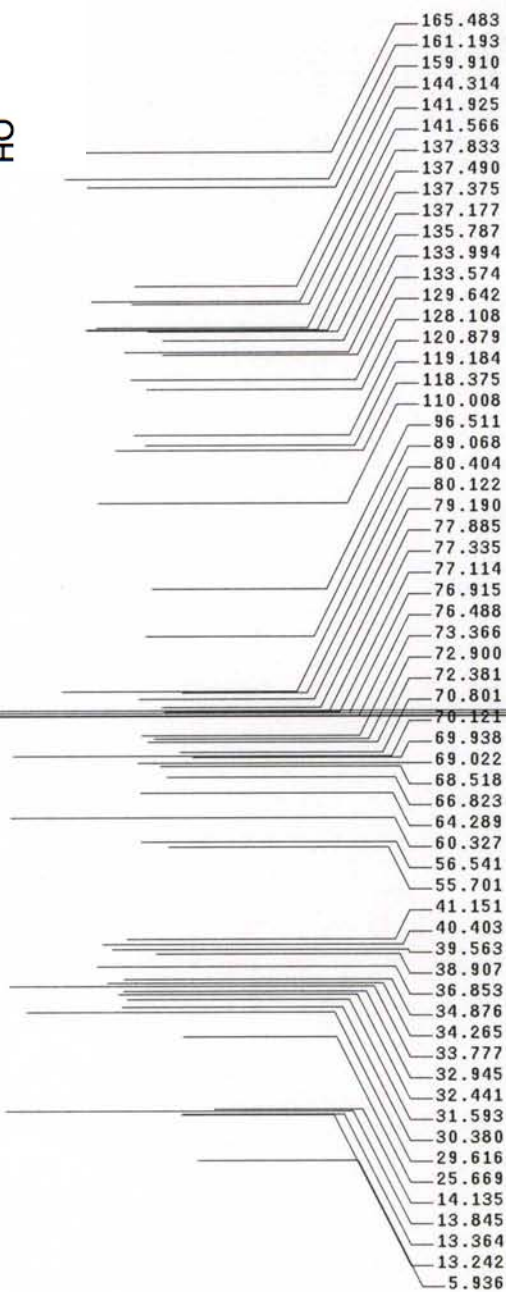

S-98

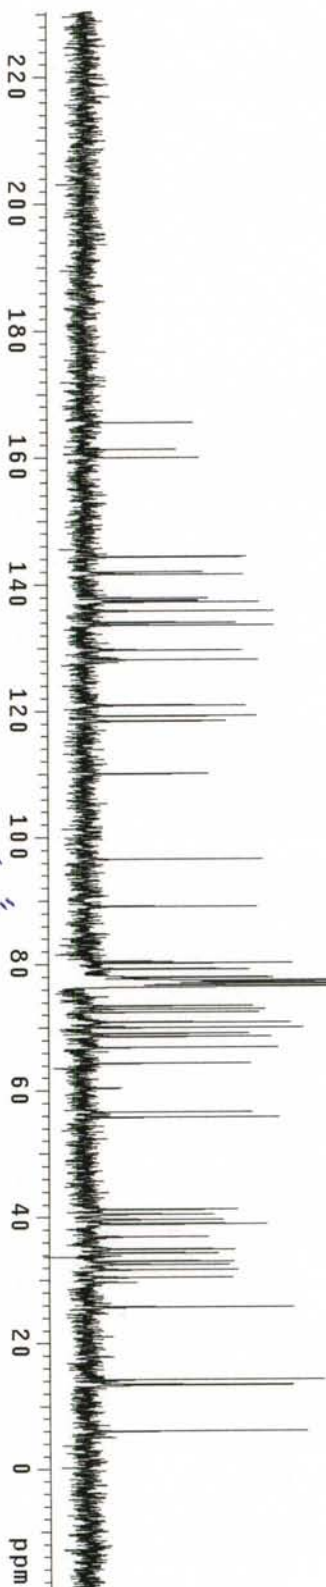

<sup>13</sup>C NMR spectrum for 4,5,4,6-dehydrobromo-phorbaxazole (**35**)
